# Supplementary material for: Home-Based Exercise and Self-Management After Lung Cancer Resection: A Randomized Clinical Trial
Source: PubMed Central journal article supplement (PMC11612835; doi:10.1001/jamanetworkopen.2024.47325), 2024-12-02
Supplement: jamanetwopen-e2447325-s001.pdf [file jamanetwopen-e2447325-s001.pdf]

1 Supplement to “Home based exercise and self-management following lung cancer  
2 resection: a randomized clinical trial”  
3  
4 **Table of contents**  
5  
6 **1.1 Trial Protocol.....2**  
7 **1.2 Amendments to original protocol, including pauses to recruitment during screening  
8 period.....31**  
9 **1.3 Statistical Analysis Plan.....34**  
10  
11

12 **Supplement 1.**

13 **1.1 Trial Protocol**

14

# Cancer And Physical ACTivity (CAPACITY) trial: A randomised control trial of exercise and self-management for people with lung cancer

---

Protocol Number: 1

Version: 6

Date: 14/09/2022

#### **Author/s:**

A/Prof Catherine Granger, A/Prof Louis Irving, Mr Phillip Antippa, Prof Mei Krishnasamy, Dr Selina Parry, Dr Karen Lamb, Ms Shaza Abo, A/Prof Gavin Wright, Prof Christine McDonald, Ms Jane Mack, Ms Georgina Whish-Wilson and Prof Linda Denehy

#### **Funding:**

Victorian Cancer Agency Clinical Research Fellowship (CRF16011)- Dr Granger (awarded 2016);

The University of Melbourne, Melbourne Clinical and Translational Sciences (MCATS) research platform seed grant (awarded 2016).

Cancer Council Victoria Grant-in-Aid

#### **CONFIDENTIAL**

This document is confidential and the property of The University of Melbourne and Royal Melbourne Hospital. No part of it may be transmitted, reproduced, published, or used without prior written authorization from the institution.

#### **Statement of Compliance**

This study will be conducted in compliance with all stipulation of this protocol, the conditions of the ethics committee approval, the NHMRC National Statement on ethical Conduct in Human Research (2007) and the Note for Guidance on Good Clinical Practice (CPMP/ICH-135/95).

16  
17  
18  
19  
20  
21  
22  
23  
24  
25  
26  
27  
28  
29  
30  
31  
32  
33  
34  
35  
36  
37  
38  
39  
40  
41  
42  
43  
44  
45  
46  
47  
48  
49  
50  
51  
52  
53  
54  
55  
56  
57  
58  
59  
60  
61  
62  
63  
64  
65  
66  
67  
68

# TABLE OF CONTENTS

|                                                                                   |           |
|-----------------------------------------------------------------------------------|-----------|
| TABLE OF CONTENTS .....                                                           | 4         |
| <b>1. GLOSSARY OF ABBREVIATIONS &amp; TERMS .....</b>                             | <b>10</b> |
| <b>2. STUDY SITE .....</b>                                                        | <b>10</b> |
| 2.1 STUDY LOCATION.....                                                           | 10        |
| <b>3. INTRODUCTION/BACKGROUND INFORMATION.....</b>                                | <b>12</b> |
| 3.1 LAY SUMMARY .....                                                             | 12        |
| 3.2 BACKGROUND INFORMATION.....                                                   | 12        |
| <b>4. STUDY OBJECTIVES.....</b>                                                   | <b>14</b> |
| 4.1 STUDY AIMS AND HYPOTHESES.....                                                | 14        |
| 4.2 OUTCOME MEASURES.....                                                         | 14        |
| <b>5. STUDY DESIGN.....</b>                                                       | <b>18</b> |
| 5.1 STUDY TYPE & DESIGN & SCHEDULE .....                                          | 18        |
| 5.2 USUAL CARE AND INTERVENTION .....                                             | 20        |
| 5.3 RANDOMISATION .....                                                           | 22        |
| 5.4 STUDY METHODOLOGY .....                                                       | 22        |
| <b>6. STUDY POPULATION .....</b>                                                  | <b>23</b> |
| 6.1 RECRUITMENT PROCEDURE .....                                                   | 23        |
| 6.2 INCLUSION CRITERIA .....                                                      | 23        |
| 6.3 EXCLUSION CRITERIA.....                                                       | 23        |
| 6.4 CONSENT .....                                                                 | 24        |
| <b>7. PARTICIPANT SAFETY AND WITHDRAWAL .....</b>                                 | <b>24</b> |
| 7.1 RISK MANAGEMENT AND SAFETY .....                                              | 24        |
| 7.2 HANDLING OF WITHDRAWALS.....                                                  | 24        |
| <b>8. STATISTICAL METHODS .....</b>                                               | <b>24</b> |
| 8.1 SAMPLE SIZE ESTIMATION & JUSTIFICATION .....                                  | 25        |
| 8.2 STATISTICAL METHODS TO BE UNDERTAKEN.....                                     | 25        |
| <b>9. DATA SECURITY &amp; HANDLING .....</b>                                      | <b>26</b> |
| 9.1 DETAILS OF WHERE RECORDS WILL BE KEPT & HOW LONG WILL THEY BE<br>STORED ..... | 26        |
| 9.2 CONFIDENTIALITY AND SECURITY.....                                             | 26        |
| 9.3 ANCILLARY DATA .....                                                          | 26        |
| <b>10. APPENDIX.....</b>                                                          | <b>26</b> |
| <b>11. REFERENCES.....</b>                                                        | <b>27</b> |
| LIST OF ABBREVIATIONS.....                                                        | 39        |
| <b>1. INTRODUCTION.....</b>                                                       | <b>40</b> |
| 1.1 Preface.....                                                                  | 40        |
| 1.2 Purpose of the SAP.....                                                       | 40        |
| <b>2 STUDY OBJECTIVES AND ENDPOINTS.....</b>                                      | <b>41</b> |
| 2.1 Study Objectives and Hypotheses .....                                         | 41        |
| 2.2 Outcome measures.....                                                         | 41        |
| 2.3 Safety outcomes .....                                                         | 42        |
| 2.4 Other outcomes.....                                                           | 42        |
| <b>3 STUDY METHODS .....</b>                                                      | <b>43</b> |
| 3.1 Study Design and Plan.....                                                    | 43        |
| 3.2 Intervention groups .....                                                     | 44        |
| 3.3 Inclusion-Exclusion Criteria .....                                            | 44        |
| 3.4 Randomisation and Blinding.....                                               | 45        |
| 3.5 Sample Size.....                                                              | 45        |
| 3.6 Study Visit Schedule.....                                                     | 46        |
| 3.7 Outcome Variables.....                                                        | 47        |
| 3.7.1 <i>Physical function</i> .....                                              | 48        |

|     |                                                                    |    |
|-----|--------------------------------------------------------------------|----|
| 69  | 3.7.2 Health-related quality of life and symptoms .....            | 49 |
| 70  | 3.7.3 Functional exercise capacity .....                           | 51 |
| 71  | 3.7.4 Muscle strength .....                                        | 51 |
| 72  | 3.7.5 Physical activity levels .....                               | 52 |
| 73  | 3.7.6 Self-efficacy for physical activity .....                    | 53 |
| 74  | 3.7.7 Fatigue .....                                                | 53 |
| 75  | 3.7.8 Distress .....                                               | 53 |
| 76  | 3.7.9 Sleep .....                                                  | 54 |
| 77  | 3.7.10 Financial toxicity.....                                     | 54 |
| 78  | 3.7.11 Return to work/Return to usual activities .....             | 55 |
| 79  | 3.7.12 Survival.....                                               | 55 |
| 80  | 3.7.13 Hospital re-admissions .....                                | 55 |
| 81  | 3.7.14 Outcomes not being covered in the main study analysis.....  | 55 |
| 82  | 4 GENERAL CONSIDERATIONS .....                                     | 55 |
| 83  | 4.1 Timing of Final Analysis .....                                 | 55 |
| 84  | 4.2 Analysis Populations.....                                      | 56 |
| 85  | 4.2.1 Full Analysis/Randomised Population .....                    | 56 |
| 86  | 4.2.2 Per Protocol Population .....                                | 57 |
| 87  | 4.2.3 Safety Population .....                                      | 57 |
| 88  | 4.3 Covariates and Subgroups.....                                  | 57 |
| 89  | 4.3.1 Covariates .....                                             | 57 |
| 90  | 4.3.2 Subgroups .....                                              | 57 |
| 91  | 4.4 Missing Data .....                                             | 57 |
| 92  | 4.5 Interim Analyses and Data Monitoring.....                      | 57 |
| 93  | 4.6 Multi-centre Studies.....                                      | 58 |
| 94  | 4.7 Multiple Testing .....                                         | 58 |
| 95  | 4.8 Estimand Framework .....                                       | 58 |
| 96  | 5 SUMMARY OF STUDY DATA .....                                      | 59 |
| 97  | 5.1 Subject Disposition.....                                       | 59 |
| 98  | 5.2 Derived variables.....                                         | 59 |
| 99  | 5.3 Protocol deviations and violations.....                        | 59 |
| 100 | 5.4 Baseline Demographic Variables .....                           | 59 |
| 101 | 5.5 Treatment Compliance.....                                      | 60 |
| 102 | 6 EFFICACY ANALYSES .....                                          | 61 |
| 103 | 6.1 Primary Efficacy Analysis .....                                | 61 |
| 104 | 6.2 Secondary Efficacy Analyses.....                               | 61 |
| 105 | 6.3 Estimand-to-analysis for primary and secondary objectives..... | 62 |
| 106 | 6.4 Exploratory Efficacy Analyses .....                            | 65 |
| 107 | 6.4.1 Complier average causal effect.....                          | 65 |
| 108 | 6.4.2 Subgroup analyses .....                                      | 65 |
| 109 | 7 SAFETY ANALYSES .....                                            | 65 |
| 110 | 7.1 Adverse Events.....                                            | 65 |
| 111 | 7.2 Serious Adverse Events .....                                   | 66 |
| 112 | 8 FIGURES .....                                                    | 66 |
| 113 | 9 REPORTING CONVENTIONS .....                                      | 66 |
| 114 | 10 TECHNICAL DETAILS .....                                         | 66 |
| 115 | 11 SUMMARY OF CHANGES TO THE PROTOCOL .....                        | 66 |
| 116 | APPENDIX A – TABLE AND FIGURE LISTING FOR THE FINAL REPORT.....    | 67 |
| 117 | APPENDIX B – TEMPLATES FOR TABLES AND FIGURES.....                 | 68 |
| 118 | APPENDIX C – DATA MAPPING TO DATABASE .....                        | 81 |
| 119 |                                                                    |    |
| 120 |                                                                    |    |
| 121 |                                                                    |    |

122

123

124

125

126

127

128

129

130

131

132

133

## STUDY SYNOPSIS

|                      |                                                                                                                                                                                                                                                                                                                                                                                                                                                                                                                                                                                                                                                                                                                                                                  |
|----------------------|------------------------------------------------------------------------------------------------------------------------------------------------------------------------------------------------------------------------------------------------------------------------------------------------------------------------------------------------------------------------------------------------------------------------------------------------------------------------------------------------------------------------------------------------------------------------------------------------------------------------------------------------------------------------------------------------------------------------------------------------------------------|
| Title:               | Cancer And Physical ACTivity (CAPACITY) trial: A randomised control trial of exercise and self-management for people with lung cancer                                                                                                                                                                                                                                                                                                                                                                                                                                                                                                                                                                                                                            |
| Short Title:         | CAPACITY trial                                                                                                                                                                                                                                                                                                                                                                                                                                                                                                                                                                                                                                                                                                                                                   |
| Design:              | Assessor blinded, two-arm superiority randomised controlled trial                                                                                                                                                                                                                                                                                                                                                                                                                                                                                                                                                                                                                                                                                                |
| Study Centres:       | Royal Melbourne Hospital<br>St Vincent's Hospital Melbourne<br>Austin Hospital                                                                                                                                                                                                                                                                                                                                                                                                                                                                                                                                                                                                                                                                                   |
| Hospital:            | Royal Melbourne Hospital<br>St Vincent's Hospital Melbourne<br>Austin Hospital                                                                                                                                                                                                                                                                                                                                                                                                                                                                                                                                                                                                                                                                                   |
| Study Question:      | What is the benefit of an exercise and education self-management program for people undergoing surgery for lung cancer?                                                                                                                                                                                                                                                                                                                                                                                                                                                                                                                                                                                                                                          |
| Primary Objectives:  | In comparison to usual care (no exercise intervention) this study aims to:<br><br>1: Test the effect of a self-management program (exercise and education) on physical function at 3 months post-operatively in patients with operable lung cancer.<br><br>Hypothesis 1: The self-management program compared with usual care will improve physical function at three months after surgery.                                                                                                                                                                                                                                                                                                                                                                      |
| Secondary Objectives | In comparison to usual care (no exercise intervention) this study aims to:<br><br>2: Test the effect of a self-management program (exercise and education) on physical activity, muscle strength and function, health-related quality of life (HRQoL), sleep and symptoms in patients with operable lung cancer at three, six and 12 months after surgery.<br><br>Hypothesis 2: The self-management program compared with usual care will improve physical activity, muscle strength and function, health-related quality of life (HRQoL), sleep and symptoms in patients with operable lung cancer at three, six and 12 months after surgery.<br><br>3: Test the effect of a self-management program (exercise and education) on health care resource usage and |

|                             |                                                                                                                                                                                                                                                                                                                                                                                                                                                                                                                                                                                                                                                                                                                                                                                                                                                                        |
|-----------------------------|------------------------------------------------------------------------------------------------------------------------------------------------------------------------------------------------------------------------------------------------------------------------------------------------------------------------------------------------------------------------------------------------------------------------------------------------------------------------------------------------------------------------------------------------------------------------------------------------------------------------------------------------------------------------------------------------------------------------------------------------------------------------------------------------------------------------------------------------------------------------|
|                             | financial burden for patients with operable lung cancer at 12 months after surgery. Hypothesis 3: The self-management program compared with usual care will reduce health care resource usage (including hospitalisations, length of stay and intensive care admissions) in the first 12 months after surgery and reduce financial burden for patients.                                                                                                                                                                                                                                                                                                                                                                                                                                                                                                                |
| Inclusion Criteria:         | <ul style="list-style-type: none"> <li>- Adults, aged 18 years or over</li> <li>- Able to provide consent</li> <li>- Planned to receive surgical treatment for non-small cell lung cancer (NSCLC)</li> <li>- Expected to be alive &gt; 6 months</li> <li>- Surgeon or physician approval</li> <li>- Eastern Cooperative Oncology Group (ECOG) performance status of 0-2 at study entry</li> <li>- Not currently meeting the physical activity guidelines (150 minutes of moderate intensity physical activity per week)</li> </ul>                                                                                                                                                                                                                                                                                                                                     |
| Exclusion Criteria:         | <p>Participants will be excluded if they meet any of the following:</p> <ul style="list-style-type: none"> <li>- Non-English speaking (insufficient English language skills to complete the questionnaires)</li> <li>- Metastatic disease (stage IV lung cancer)</li> <li>- Acute uncontrolled cardiovascular or respiratory issues</li> <li>- Decompensated heart failure, severe aortic stenosis, uncontrolled arrhythmia, or acute coronary syndrome</li> <li>- Non-ambulant (for example: amputee, spinal cord injury, wheel-chair bound)</li> <li>- ECOG performance status of 3 or 4 at study entry</li> <li>- Cognitive impairment (determined as not being able to provide consent for surgery)</li> </ul>                                                                                                                                                     |
| Number of Planned Subjects: | 112                                                                                                                                                                                                                                                                                                                                                                                                                                                                                                                                                                                                                                                                                                                                                                                                                                                                    |
| Intervention:               | <p>Participants in both arms will receive usual medical, nursing and allied health care. Usual physiotherapy care does not routinely involve assessment or treatment pre-operatively or after discharge from the acute hospital stay.</p> <p>In addition to usual care, participants in the intervention arm will receive an exercise and education self-management program. The program consists of two appointments with physiotherapists (prior to hospital discharge post surgery). This includes 1) assessing patient's readiness for physical activity (PA) behavioural change, goals, confidence; 2) verbal education for patient/carer/family about PA; 3) provision of resources to support PA (activity monitor – Garmin watch, exercise diary, pamphlets); 4) setting personalized PA goals and a home program; and 5) identifying barriers/enablers to</p> |



|                        |                                                                                                                                                                                                                                                                                                                                                                                                                                                                                                                                                                                                                                                                                                                     |
|------------------------|---------------------------------------------------------------------------------------------------------------------------------------------------------------------------------------------------------------------------------------------------------------------------------------------------------------------------------------------------------------------------------------------------------------------------------------------------------------------------------------------------------------------------------------------------------------------------------------------------------------------------------------------------------------------------------------------------------------------|
|                        | <p>achieve PA goals. Additionally, the patient will receive weekly phone calls to promote adherence to PA goals, discuss barriers/issues and progress exercise. The intervention is designed to be equitable and inclusive of rural patients- appointments are timed with surgical consults and additional intervention is phone-based. The intervention continues until 3 months post-surgery.</p>                                                                                                                                                                                                                                                                                                                 |
| Safety considerations: | <p>The tests and exercise program to be applied in this trial are unlikely to cause physical and/or psychological distress. The assessments will be performed by a trained physiotherapist. Participants may find the walking and functional tests and the exercise program tiring as these are types of physical activity. Participants will be provided a rest between these tests. If a participant reports an injury associated with exercise at home they will be referred to their general practitioner for review.</p>                                                                                                                                                                                       |
| Statistical Methods:   | <p>The randomisation list will be devised by the independent statistician and carried out through a central telephone service to ensure allocation concealment. Following consent and assessment, participants are randomised 1:1 (intervention or usual care).</p> <p>All data analyses will be undertaken on an intention-to-treat approach. We expect missing data will be missing completely at random (MCAR) so missing data will be ignored unless otherwise specified. For the primary analysis, the distribution of mean change in EORTC QLQ-C30 physical function domain from baseline to 3 months will be compared between the two arms (intervention and usual care) using a Wilcoxon rank sum test.</p> |
| Subgroups:             | <p>Sub-group analyses will be conducted between participants who receive post-operative chemotherapy and or radiotherapy and participants who do not receive any post-operative chemotherapy or radiotherapy, as these groups have a different recovery path following surgery and may respond differently to the exercise intervention.</p>                                                                                                                                                                                                                                                                                                                                                                        |

135

136

137

138  
139

## 1. GLOSSARY OF ABBREVIATIONS & TERMS

| Abbreviation           | Description                                                                                                         |
|------------------------|---------------------------------------------------------------------------------------------------------------------|
| COST                   | COmprehensive Score for financial Toxicity                                                                          |
| ECOG                   | Eastern Cooperate Oncology Group                                                                                    |
| EORTC QLQ C30 and LC13 | European Organisation for the Research and Treatment of Cancer Quality of Life Questionnaire and Lung Cancer Module |
| HADS                   | Hospital Anxiety and Depression Scale                                                                               |
| HRQoL                  | Health-Related Quality of Life                                                                                      |
| IPAQ                   | International Physical Activity Questionnaire                                                                       |
| NSCLC                  | Non-small Cell Lung Cancer                                                                                          |
| PA                     | Physical Activity                                                                                                   |
| PASE                   | Physical Activity Scale for the Elderly                                                                             |
| RMH                    | Royal Melbourne Hospital                                                                                            |
| SPPB                   | Short Physical Performance Battery                                                                                  |
| QALYs                  | Quality adjusted life years                                                                                         |
| 6MWD                   | Six Minute Walk Distance                                                                                            |

140

## 2. STUDY SITE

141  
142

### 2.1 STUDY LOCATION

| Site                            | Address                                                          | Contact Person       | Phone | Email |
|---------------------------------|------------------------------------------------------------------|----------------------|-------|-------|
| Royal Melbourne Hospital        | Level 3 Physio Department, 300 Grattan Street Parkville Victoria | Dr Catherine Granger |       |       |
| St Vincent's Hospital Melbourne | Department of Cardiothoracics<br>41 Victoria Parade Fitzroy 3065 | A/Prof Gavin Wright  |       |       |

|                                         |                                                                                                                                                                                                     |                            |  |  |
|-----------------------------------------|-----------------------------------------------------------------------------------------------------------------------------------------------------------------------------------------------------|----------------------------|--|--|
| St Vincent's Private Hospital (Fitzroy) | 59 Victoria Parade Fitzroy 3065                                                                                                                                                                     | A/Prof Gavin Wright        |  |  |
| Austin Hospital                         | Austin Hospital, Department of Respiratory and Sleep Medicine, Harold Stokes Building, Level 5, Heidelberg VIC 3084<br><br>PO Box 5555, Heidelberg, VIC, 3084<br>PO Box 5555, Heidelberg, VIC, 3084 | Prof Christine McDonald AM |  |  |

144

145

146 **3. INTRODUCTION/BACKGROUND INFORMATION**

147 **3.1 LAY SUMMARY**

148 The majority of people with operable lung cancer now survive yet they suffer significant  
149 physical hardship. New models of care are required to minimise morbidity for this large  
150 and vulnerable group. This project will test the benefit of an exercise and education self-  
151 management program, compared to usual care, for people undergoing surgery for lung  
152 cancer to improve their physical function and functional recovery. The project will involve  
153 112 people undergoing surgery for lung cancer in Victoria, Australia. Participants will be  
154 randomised before surgery to either the intervention arm (exercise and education self-  
155 management program) or the usual care (no exercise program) arm. Participants in both  
156 arms will receive usual medical, nursing and allied health care. In addition to usual care,  
157 participants in the intervention arm will receive an exercise and education self-  
158 management program. The program consists of two appointments with a physiotherapist  
159 (before hospital discharge post-operatively). Additionally, the patient will receive weekly  
160 phone calls up to 12 weeks after surgery to promote adherence to physical activity goals,  
161 discuss barriers/issues with their exercise and progress their exercise program. The  
162 intervention is designed to be equitable and inclusive of rural patients, as measurement  
163 and intervention appointments are timed with surgical consults and additional intervention  
164 is phone-based. Participants in both arms will undergo a battery of tests with a blinded  
165 assessor including measurement of physical function, quality of life and physical activity at  
166 before surgery, at hospital discharge, and at 12 weeks, 6 months and 12 months post-  
167 surgery. We will also follow up to look at health care resource usage (including hospital  
168 length of stay and hospital readmission) and the cost effectiveness of the intervention over  
169 12 months from surgery. This study will provide important information on the benefit of an  
170 exercise based intervention for people with lung cancer.

171

172 **3.2 BACKGROUND INFORMATION**

173 Lung cancer significantly impacts on the health and wellbeing of Australians, the  
174 community and the healthcare system [1, 2]. The majority of people with operable lung  
175 cancer now survive (stage I-II five year survival is 38 to 76%) [3], however the burden on  
176 the patient (activity limitations, participation restrictions and diminished health-related  
177 quality of life [HRQoL]) and healthcare system (high hospital utilization) is high [1, 2, 4].  
178 There is a need for improved models of care [5]. Our vision through the generation of high  
179 quality research is to improve the quality of survival of people with lung cancer through  
180 feasibly and sustainably implementing exercise into the model of care.

181 Physical inactivity is a global pandemic [6]. There are strong well-established evidence-  
182 based guidelines regarding the amount of physical activity (PA) that people with cancer  
183 should undertake [7-9]. The PA guidelines state that individuals with cancer should  
184 engage in 30 minutes of moderate intensity PA on five or more days of the week [8].  
185 These guidelines are supported by a strong evidence base demonstrating that increased  
186 levels of PA in cancer are associated improved physical function, fitness, HRQoL and  
187 lower levels of symptoms and depression [10]. In breast and colon cancer, increased PA  
188 is also associated improved survival [11, 12]. Exercise is an inexpensive, safe, simple and  
189 powerful treatment in cancer. However the evidence has not translated into clinical  
190 practice and patients are not therefore currently receiving best-practice [5]. Our research  
191 program targets this evidence-practice translation gap.

192 **In part I of our research program** we led the first study to measure PA levels of people  
 193 with lung cancer in Australia (Dr Granger's PhD project; study funded by 2010 Victorian  
 194 Cancer Agency Palliative/Supportive Care Capacity Building Grant) [4, 13]. Including 50  
 195 patients with stage I-IIIB non-small cell lung cancer (NSCLC) from Royal Melbourne  
 196 Hospital (RMH), Peter MacCallum and Austin Hospital, and 35 aged-matched healthy  
 197 controls, we found people with lung cancer have low PA levels (33% fewer steps/day than  
 198 healthy-controls at diagnosis) and suffer detrimental functional decline (measured by the  
 199 six minute walk distance 6MWD) over first 6-months post-surgery (Figure 1) [4, 13]. Only  
 200 40% of patients met PA guidelines at diagnosis, 26% during treatment and 31% at 6  
 201 months. Patients who were more active had better HRQoL, physical function and fitness,  
 202 and less depression and symptoms [4, 13].

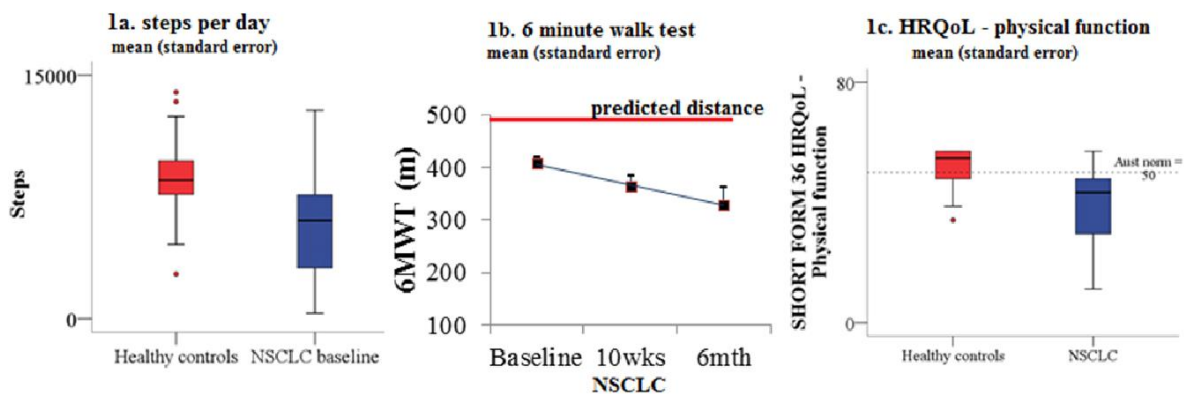

203  
 204 Figure 1: Low PA levels (1a) and poor HRQoL (1c) compared to aged matched healthy  
 205 controls; and decline in functional capacity over 6 months from diagnosis (1b)[4, 13]

206 Importantly, only 8% of patients had access to exercise treatment in the first 6 months  
 207 after diagnosis [4, 13]: this is a significant issue and will not change without changes to  
 208 the model of care. Current outpatient exercise programs/services (i.e. pulmonary  
 209 rehabilitation) are at full capacity with waiting lists and expansion of their inclusion criteria  
 210 beyond respiratory diseases [14] to cancer is not possible. An alternative, cost-effective,  
 211 low-resource and feasible model is required to effectively and sustainably implement  
 212 exercise into cancer care to improve patient outcomes. We developed a new model and  
 213 investigated the feasibility of its implementation (PART II) in 2014 as described below.

214 **In part II of our research program** (Dr Granger funded by 2013 NHMRC/Cancer  
 215 Australia Translating Research Into Practice Fellowship) we piloted a new model, which  
 216 included an exercise and education self-management program for patients before and  
 217 after surgery for lung cancer [15]. The pilot (n=42 patients, RMH 2014 - 2015)  
 218 demonstrated high feasibility (88% consent rate), safety (no adverse events), inclusion of  
 219 rural patients, high patient satisfaction (mean 9.8/10 global satisfaction score) and was  
 220 associated with trends of efficacy including improved global HRQoL (European  
 221 Organisation for Research and Treatment of Cancer EORTC-QLQ-C30 questionnaire  
 222 mean difference +21.4, 95%CI 7.9–35.0, p=0.005) and maintained PA levels (p=0.416)  
 223 from pre-operatively to 6-months post-surgery. Patient's confidence to exercise increased  
 224 from 5.4/10 to 9.2/10. As part of this research we also investigated barriers and facilitators  
 225 to implementation of exercise using quantitative and qualitative methodology with 17  
 226 multi-disciplinary clinicians and 8 consumers, and a systematic review (including 1074  
 227 patients, 23 carers and 169 clinicians) [16, 17] - these results informed the current RCT  
 228 proposal for Part III.

229 **For part III of our research program we are now** conducting a world first clinical trial to  
230 evaluate this exercise and education self-management program. The current trial is  
231 funded by the Victorian Cancer Agency via a Clinical Research Fellowship for Dr Granger  
232 (2017 - 2023) and a Cancer Council Victoria grant in aid.

233

## 234 **4. STUDY OBJECTIVES**

### 235 **4.1 STUDY AIMS AND HYPOTHESES**

236 In comparison to usual care (no exercise intervention) this study aims to:

237 1. Test the effect of a self-management program (exercise and education) on  
238 physical function at 3 months post-operative in patients with operable lung cancer.  
239 Hypothesis 1: The self-management program compared with usual care will  
240 improve physical function at three months after surgery.

241 2. Test the effect of a self-management program (exercise and education) on  
242 physical function, physical activity (levels and self-efficacy), muscle strength and  
243 function, health-related quality of life (HRQoL), sleep and symptoms in patients  
244 with operable lung cancer. Hypothesis 2: The self-management program  
245 compared with usual care will improve physical function, physical activity (levels  
246 and self-efficacy), muscle strength and function, health-related quality of life  
247 (HRQoL), sleep and symptoms in patients with operable lung cancer at three, six  
248 and 12 months after surgery.

249 3. Test the effect of a self-management program (exercise and education) on health  
250 care resource usage and financial burden for patients with operable lung cancer at  
251 12 months after surgery. Hypothesis 3: The self-management program compared  
252 with usual care will reduce health care resource usage (including hospitalisations,  
253 length of stay and intensive care admissions) in the first 12 months after surgery  
254 and reduce financial burden for patients.

255 4. Exploratory aim: to explore the cost effectiveness of a self-management program  
256 (exercise and education) for patients with operable lung cancer. Hypothesis 4: The  
257 self-management program will be cost-effective compared to current standard  
258 treatment in patients with operable lung cancer at 12 months after surgery.

259

### 260 **4.2 OUTCOME MEASURES**

261 Outcomes will be evaluated at the following five time points: prior to surgery, prior to  
262 hospital discharge post-operatively, and 12 weeks, 6 months and 12 months post-  
263 operatively. Please refer to Figure 2 for the time schedule for each test (not all tests are  
264 completed at every time point). This testing will take up to 90 minutes per testing session.

265 The primary outcome is physical function measured by physical function domain of the  
266 European Organization for the Research and Treatment of Cancer questionnaire (EORTC  
267 QLQ C3) [18] (primary endpoint). We are also measuring physical function using two  
268 objective tests: the 6 minute walk distance [19-21] and the Short Physical Performance  
269 Battery (SPPB) [22] although these are secondary end points. The study is powered for

270 the primary outcome measure of physical function domain of the EORTC QLQ C30 not  
271 the secondary outcomes.

272 The EORTC is a self-reported questionnaire that assesses HRQoL over the past week.  
273 The 30 item core questionnaire includes nine multi-item scales comprised of five  
274 functional scales (physical, role, emotional, cognitive and social functioning), three  
275 symptom scales (pain, fatigue and nausea/vomiting) and a global health status/quality of  
276 life scale and six single-item scales (appetite loss, dyspnoea, diarrhea, constipation,  
277 insomnia and financial impact [18]. The 13 item LC13 supplementary module includes  
278 multi and single items scales measuring symptoms and treatment side-effects specific to  
279 lung cancer [23]. Responses to most questions are rated on a four point Likert type scale  
280 according to occurrence in the past week (not at all, a little, quite a bit and very much). All  
281 domain and single-item raw scores are linearly transformed to a scale of zero to 100 [24].  
282 Higher scores on functional domains and global health status/quality of life scale  
283 represent higher functioning and higher HRQoL. Lower scores on symptom domains and  
284 single-items represent less symptoms [18, 24]. The EORTC-QLQ-C30 core questionnaire  
285 has strong test-retest reliability for the physical function domain ( $r=0.91$ ) [25] and is  
286 responsive to change from pre-treatment to during-cancer treatment [18, 23].

287 The 6 Minute Walk Distance (6MWD) is a commonly used and validated surrogate  
288 measure of submaximal exercise tolerance, with high clinical utility [26]. Participants are  
289 asked to walk up and down a 25 – 30m flat straight corridor and cover as much ground as  
290 possible in six minutes [21]. Studies have demonstrated a familiarisation effect of the  
291 6MWD, with the second 6MWD increasing 9 to 15m during a testing session [27];  
292 therefore guidelines recommend the use of two repeated 6MWD [26]. The 6MWD has  
293 moderate to strong criterion-concurrent validity against the gold standard measure of  
294 functional capacity (cardio-pulmonary exercise testing) ( $r = 0.51 - 0.93$ ) [28-31]. Inter-rater  
295 reliability for the 6MWD in chronic lung and cardiac disease is strong (ICC = 0.90 - 0.93)  
296 [32-35]. Responsiveness has been demonstrated by multiple studies, with the distance  
297 increased in individuals undergoing thoracic surgery or participating in an exercise  
298 intervention [31]. We have previously shown that the 6MWD deteriorates by 78m over six  
299 months in a usual care cohort (effect size = 0.7) of 90 patients with lung cancer stages I-IV  
300 and that ceiling effects occurred in only 3.6% of patients [19]. We have also shown that  
301 the minimal important difference in lung cancer is 22 to 42m [19].

302 The Short Physical Performance Battery (SPPB) is an objective measure of physical  
303 function [22] consists of three tests: 1) Gait speed: participants are instructed to walk a  
304 distance of eight feet (2.4 meters) and the average of two trials are used; 2) Standing  
305 balance: participants are assessed in three different static positions (side-by-side stand,  
306 semi-tandem stand and tandem stand) for 10 seconds each; and 3) Chair rise task:  
307 participants are instructed to stand up and sit down five times in a row as quickly as  
308 possible. Each individual test is scored on a scale of zero to four points (higher scores are  
309 better performance). The three test scores are summated to give an overall SPPB  
310 performance score ranging from zero to 12 points. A zero score indicates poor function  
311 whilst 12 indicates excellent function. If the participant is unable to physically perform a  
312 specific test, a score of zero is assigned. It has been previously reported in the literature  
313 that for older adults a score of 10 is considered the cut-off for mobility impairment (i.e.  
314 scores <10 = poor mobility) [36].

### 315 **Secondary outcomes:**

316 The following secondary outcomes will also be assessed.

317

318

319 Objective tests:

320 - *Quadriceps muscle Strength*: Participants will have their isometric peripheral muscle  
321 strength measured in bed for quadriceps muscles using the MicroFET hand held  
322 dynamometer (which can be used to assess peripheral musculature). This device has  
323 been shown to have robust measurement properties (both reliability and validity)  
324 against the criterion reference KinCom laboratory based dynamometer [37]. These  
325 muscles will be assessed using standardised methodology in a seated position. The  
326 highest value achieved among three maximum contractions with a coefficient of  
327 variation less than 10% will be recorded.

328

329 - *Quadriceps muscle ultrasound Imaging*: Ultrasound imaging will be conducted using  
330 Sonosite iViz ultrasound machine with a linear transducer by the blinded assessor  
331 physiotherapist. Device settings will be kept constant between participants and  
332 across timepoints. The quadriceps will be measured at 2/3 distance from anterior  
333 superior iliac spine to superior border of the patella. Muscle ultrasound is  
334 inexpensive, and has high reproducibility and reliability [38].

335 - *Physical activity levels*: A movement sensor device will be placed on the participant's  
336 wrist or hip (depending on patient preference). The device is small (size of a  
337 matchbox) and will be worn for up to one week at each time-point of testing and  
338 participants will be given a pre-paid addressed envelope to post the device back to the  
339 investigators at the end of the week. This has worked in our previous studies.

340 Questionnaires (please see the appendix for a copy of the questionnaires):

341 - *Physical activity levels*: Physical activity will be measured using the International  
342 Physical Activity Questionnaire (IPAQ) [39] and the Physical Activity Scale for the  
343 Elderly (PASE) (Washburn 1999; Washburn 2000; Schuit 1997). There is significant  
344 controversy within the literature as to the most suitable questionnaire to assess  
345 physical activity and therefore to allow us to compare our results with the  
346 recommended guidelines, normative Australian and international data and previous  
347 studies we need to use both questionnaires. Participants will be informed that whilst  
348 there is some overlap in the questions, it is important to try to complete all questions.

349

350 - *Self-efficacy questionnaires*: measured with the barriers, task and walking self-efficacy  
351 scales [40, 41] which have been used in cancer exercise trials before and were  
352 specifically designed to evaluate self-efficacy of people with cancer.

353

354 - *Sleep*: measured with the 8-item Sleep Disturbance – Short Form 8b, a valid measure  
355 of sleep disturbance [42].

356

357 - *Fatigue*: measured with the Brief Fatigue Inventory [43]. This tool assesses the  
358 severity of fatigue and the impact of fatigue on daily function in patients with cancer,  
359 and asks about fatigue over the past 24 hours [43].

360

361 - *Mood*: measured with the Hospital Anxiety and Depression Scale (HADS) [44, 45].  
362 The HADS is a tool for identification of depression, anxiety and distress [44, 46, 47].



363 Distress will be recorded using the Distress Thermometer, a modified 11 point visual  
364 analogous scale, which asks the participant to rate the distress they have been  
365 experiencing over the previous seven days from zero (no distress) to 10 (extreme  
366 distress) [48].

367  
368 - *Financial toxicity*: measured with the COmprehensive Score for financial Toxicity  
369 (COST) questionnaire specifically developed and validated to measure financial risk  
370 for patients with cancer [49, 50].

371  
372 - *Return to work*: measured with the Employment questionnaire [51]. This is a newly  
373 developed questionnaire by our colleagues studying intensive care rehabilitation in the  
374 USA [51]. We have adapted this to refer to lung cancer instead of intensive care as a  
375 means to collect these data.

376  
377 - *Economic analyses*: using the European Quality of Life EQ-5D-5L [52]. This 5-item  
378 questionnaire is a commonly used measure of HRQoL that can be used to calculate  
379 QALYs (quality adjusted life years) for health economic analysis. For example, we can  
380 calculate an incremental cost-effectiveness ratio which will inform dollars per QALY  
381 gained as a result of the intervention. This is a useful metric that will allow  
382 comparisons with other interventions.

383  
384 Demographic and medical data will be obtained. This includes age, sex, residential post-  
385 code, type of cancer, type of cancer treatment, smoking history, body mass index,  
386 respiratory function, social situation, pre-morbid mobility and comorbidities. Comorbidities  
387 will be scored with the simplified Colinet comorbidity score. The surgical procedures,  
388 complications and hospital length of stay will be recorded. All hospitalisations including  
389 costs over a 12-month period will be obtained from routinely collected hospital  
390 administrative data. All costs which are relevant to the implementation and delivery of the  
391 service will be identified, measured and valued accordingly. This includes the cost to  
392 coordinate the project (e.g. project manager), number of staff (and staff time) involved in  
393 planning and supporting the intervention (this may include training and service delivery).  
394 Participants will be followed up for survival for five years after diagnosis.

395  
396 Participants in the intervention group will be asked to complete a survey before and after  
397 the intervention program to gather their views on the program and ongoing barriers and  
398 enablers to continued exercise following conclusion of the intervention (please see  
399 Appendix).

400  
401 A random sample of 15 (minimum) to 20 (maximum) participants in the intervention group  
402 will also be asked to participate in a semi-structured interview to further explore their  
403 views on the actual program at 3 months post-operatively. The interview will be conducted  
404 at a time agreed upon with the patient, using video-conferencing (preferred option), in  
405 person (other preferred option) or over the phone (least preferred option) by a  
406 physiotherapist member of the research team who was not their treating physiotherapist  
407 and did not provide the intervention program to them.

408  
409 For the video-conferencing option: these will be conducted via Zoom videoconferencing  
410 software hosted by The University of Melbourne. Video interviews are preferred over  
411 phone interviews due to their ability to facilitate increased rapport between the participant  
412 and the interviewer, as well as allowing the interviewer to obtain more accurate field  
413 notes. Zoom interview meetings will be password protected, with participants unable to

414 enter the virtual meeting until being 'admitted' from the virtual waiting room by the  
415 researcher as a second-line security measure. Interview sessions will be manually 'locked'  
416 by the researcher, meaning no other participants will be able to enter after the session  
417 commences (although interviews will not be scheduled immediately before or after  
418 another participant). Participants will be informed of the intent to audio and video record  
419 the interview at the time of scheduling and asked for their specific consent to record at the  
420 commencement of the interview (as per our original protocol). Participants who decline to  
421 be video recorded will be guided by the researcher to turn off their camera during the  
422 Zoom interview. Zoom interviews will be both audio and video-recorded via the Zoom  
423 application. Telephone interviews will be utilised as a back-up in the event of connection  
424 breakdown. To account for the possibility of software failure, back-up audio-only  
425 recordings will be taken on an external audio recording device and deleted once the Zoom  
426 recording is confirmed to have saved correctly. The rationale for obtaining video recordings  
427 is to facilitate the researcher to be able to expand upon field notes after the interview  
428 concludes, ensuring their accuracy and detail. This will allow one sole researcher to  
429 complete the interviews and not rely on a second researcher to be present. All video and  
430 audio recordings will be immediately saved onto the RMH server on a locked folder only  
431 accessible to the research team.

432  
433 The interview will be conducted in a semi-structured open format. The interview will be  
434 recorded and transcribed at a later date. Transcriptions will be checked by a second  
435 researcher. Participants will be emailed or posted (depending on their preference) a  
436 summary of the analysis and asked to determine if the interpretation is consistent with  
437 their perspective. Participants who perform the interview in person or via video-  
438 conferencing will be asked if the interview can be videoed. With their specific consent this  
439 will be performed. The rationale for this is if the intervention is effective for implementation  
440 into practice. Video clips could be used for 1) "advertising" the program to patients in the  
441 future who have been told they need surgery to help motivate them and encourage them  
442 to think positively about life after the surgery. This would be a new approach to patient  
443 information and preparation pre-surgery; 2) provide excellent material for presenting at  
444 conferences and encouraging other clinicians to take up/implement the intervention if  
445 shown to be effective; 3) would be great for consumer advocacy and information in terms  
446 of what to ask for should they be diagnosed with a need surgery for lung cancer; and 4)  
447 great for inclusion as novel teaching resource across VCCC clinical partners. The  
448 qualitative aspect of this trial is overseen by Prof Mei Krishnasamy who has extensive  
449 experience in patient outcomes and qualitative research in cancer.

450  
451  
452

## 453 **5. STUDY DESIGN**

### 454 **5.1 STUDY TYPE & DESIGN & SCHEDULE**

455 This is an assessor blinded, two-arm superiority randomised controlled trial. This will be  
456 conducted in at the Royal Melbourne Hospital, St Vincent's Hospital Melbourne, St.  
457 Vincent's Private Hospital (Fitzroy) and Austin Hospital. 112 participants will be included in  
458 this study. The trial will be reported according to the CONSORT Statement extension for  
459 non-drug interventions. Following ethical approval, the trial will be registered on  
460 clinicaltrials.gov and the protocol and statistical plan will be published.

461 Participants will also be asked to participate in five testing sessions across the 12 month  
462 period with the first testing session just prior to surgery and subsequent sessions

463 scheduled: before hospital discharge, and at 3 months, 6 months and 12 months post  
 464 surgery. Each testing session is anticipated to take a maximum of 90 minutes in total.  
 465 Assessments will occur in the outpatient physiotherapy, thoracic surgery or respiratory  
 466 medicine departments, however for participants unable to travel/drive to attend or those  
 467 who prefer not to attend the hospital the hospital for follow-up appointments, will be  
 468 offered a home visit assessment if they live within a feasible distance of the hospital.

469 Home Visit Procedure and Contingency Plan:

470 If a patient is unable or prefers not to attend the hospital for follow up assessments they  
 471 may be offered a home visit assessment. Home visits will be conducted in line with  
 472 policies and procedures of the relevant hospital. At Royal Melbourne Hospital, this  
 473 assessment will be conducted in line with the Melbourne Health Home Visit Screen and  
 474 Assessment Policy (Number: MH15.22, expiry date 27 Nov 2017). As per the policy  
 475 guidelines no home visit will occur until a Risk Assessment Plan has occurred  
 476 (Occupational Health and Safety Home Visit Risk Assessment Form OP/IP 18/NWMH  
 477 Risk Assessment and Plan form) and it has been deemed safe for the home visit to occur.  
 478 This form will also be filed with medical records. This will occur at each time that the  
 479 patient requires a home visit. Any incidents or potential hazards that are identified will be  
 480 reported on Riskman as per the policy. Assessors performing a home visit will follow the  
 481 usual home visit physiotherapy procedures including carrying a mobile phone and calling  
 482 in and out (phoning Dr Catherine Granger, or if Dr Granger is performing the home visit  
 483 she is to call the Physiotherapy Manager Alana Jacob) before and after the home visit.  
 484 We expect home visits to be infrequent as we will try to align the follow up assessments  
 485 with existing medical appointments to minimise participant burden. The costs of home  
 486 visits for the trial will be recorded.

487 Plan for Data collection and Storage:

488 The information collected will be kept in a potentially re-identifiable format – in case after  
 489 submission for manuscript publication the journal requires further patient information from  
 490 the medical history. Paper copies of data collection sheets and questionnaires will be  
 491 coded and stored in locked filing cabinet stored in a locked office which will only be  
 492 accessible by study personnel. At Royal Melbourne Hospital, these forms will be stored in  
 493 Dr Granger’s research office in Level 5 Allied Health. Data will also be stored in electronic  
 494 format on password-protected computer. Data will be kept for a minimum of five years  
 495 after publication and after this time paper copies will be shredded and electronic files  
 496 deleted.

497 *Table 1: Outcome measures to be administered across study time points*

| Assessment/<br>Procedure                                                         | Screening | Pre-surgery<br>and before<br>randomisation | Post-<br>operatively<br>before<br>hospital<br>discharge | 3 months<br>post-<br>operatively | 6 months<br>post-<br>operatively | 12 months<br>post-<br>operatively |
|----------------------------------------------------------------------------------|-----------|--------------------------------------------|---------------------------------------------------------|----------------------------------|----------------------------------|-----------------------------------|
| Informed<br>Consent                                                              | x         |                                            |                                                         |                                  |                                  |                                   |
| Demographic<br>and medical<br>information,<br>including<br>surgical<br>procedure |           | X                                          | X                                                       |                                  |                                  |                                   |

|                                                                                    |  |          |   |           |   |            |
|------------------------------------------------------------------------------------|--|----------|---|-----------|---|------------|
| <b>EORTC QLQ C30 and L13 questionnaire</b>                                         |  | <b>X</b> |   | <b>X*</b> | X | X          |
| Physical function test– 6MWD                                                       |  | X        |   | X         | X | X          |
| Physical function test – SPPB                                                      |  | X        | X | X         | X | X          |
| Muscle strength and function tests                                                 |  | X        | X | X         | X | X          |
| Physical activity – activity devices, and PA levels questionnaires                 |  | X        |   | X         | X | X          |
| Self efficacy questionnaires                                                       |  | X        |   | X         | X | X          |
| Symptoms, sleep, fatigue, financial burden, return to work and mood questionnaires |  | X        |   | X         | X | X          |
| Intervention satisfaction and knowledge questionnaires (intervention group only)   |  | X        |   | X         |   |            |
| EQ 5D 5L                                                                           |  | X        |   | X         | X | X          |
| Health care resource usage data over 12 months                                     |  |          |   |           |   | X          |
| Pre post surveys (views of program)                                                |  | X        |   | X         |   |            |
| Interviews with 15-20 participants                                                 |  |          |   | X         |   |            |
| Survival follow-up                                                                 |  |          |   |           |   | to 5 years |

498 \*Primary endpoint

499 **5.2 USUAL CARE AND INTERVENTION**

500 **Usual care (both arms):** Usual medical, nursing and allied health care will be provided to  
501 both groups. Usual physiotherapy care does not routinely involve assessment or  
502 treatment pre-operatively or after discharge from the acute hospital stay. Physiotherapy in  
503 the post-operative period (when patients are in hospital after surgery) follows a clinical  
504 pathway as per usual practice. This will be audited via the medical records for the purpose

505 of this study to document the physiotherapy participants in both groups receive. The usual  
506 care physiotherapist on the ward will be blinded to group allocation.

507 **Intervention arm:** In addition to usual care, participants randomised to the intervention  
508 arm will also receive an exercise and education self-management program as tested in  
509 our feasibility study [15]. The intervention implements the best available evidence  
510 regarding PA for lung cancer [7, 8, 53]. The intervention components are focused around  
511 education, training and enablement from the behavioural change wheel framework [54]  
512 and on behavioural change support to address patients' behavioural, emotional,  
513 situational and/or cognitive barriers to initiating/sustaining action (exercise) [55, 56]. The  
514 program consists of two appointments with physiotherapist (just before hospital discharge  
515 post-op) and weekly telephone call support up to 12 weeks post-operatively. The following  
516 describes the intervention (which was piloted in our previous study) [15]:

517 1. Post-operative physiotherapy appointment(s). If needed this appointment can be split  
518 over two sessions. These sessions are usually delivered while the patient is still in  
519 hospital after surgery, but if the patient is discharged home quickly, they can be  
520 delivered over the telephone if needed: The first half of the appointment is focused on:

- 521 a. Assessing the patient's current level of PA, fitness, HRQoL and mood
- 522 b. Assessing the patient's readiness for behavioural change regarding PA

523 The focus of the second half of the appointment will be:

- 524 c. Educating the patient and their carer(s) about PA. Patients will be given access  
525 to resources with the information about PA to take home. Participants will also  
526 be given a Garmin activity tracker watch to use during the intervention period  
527 to self-monitor their physical activity
- 528 d. Working with the patient and their carer to set personalized and individual  
529 goals regarding their participation in PA. Patients with lung cancer present with  
530 other comorbid disease, including depression and COPD that are unique to  
531 this diagnosis. Therefore to improve efficacy a targeted approach to PA is  
532 required, that addresses individual goals and PA prescribed from a baseline  
533 PA/fitness test for each individual separately.
- 534 e. Identifying barriers and enablers for the patient to be engaged in sufficient PA  
535 and brainstorm strategies to overcome these.

536 A focus of the program is Behavioural Change Support. There is growing  
537 recognition that provision of treatment education or advice alone is not sufficient to  
538 produce significant changes in health behaviour. There are three main groups of  
539 processes that are required to support patient behaviour change for adherence to  
540 treatment [55]. These are building a strong therapeutic alliance, building or  
541 reinforcing motivation and building or reinforcing self-efficacy. The clinical practice  
542 model developed from these processes instructs clinicians on how to engage  
543 patients in clinical face-to-face and telephone consultations [56]. The model  
544 actively addresses individual behavioural, emotional, situational and cognitive  
545 barriers to initiating and sustaining action to meet clinical guidelines for PA. A  
546 cancer diagnosis may represent "a teachable moment"-a time that survivors are  
547 more receptive to health behaviour counselling in PA [57]. Furthermore  
548 improvement in PA, symptoms and HRQoL in people with a variety of chronic  
549 diseases including lung cancer are reported using these techniques [58 , 59].

550 2. Weekly follow-up phone calls from the physiotherapist to the patient (and where  
551 possible the carer) to promote adherence to PA goals, progress exercise and discuss  
552 any new barriers or issues (the phone calls occur each week up until 12 weeks post-  
553 op).

554 Participants will be asked to keep an exercise diary during the intervention period to  
555 record their daily exercises.

556 The costs of delivering the intervention will be recorded.

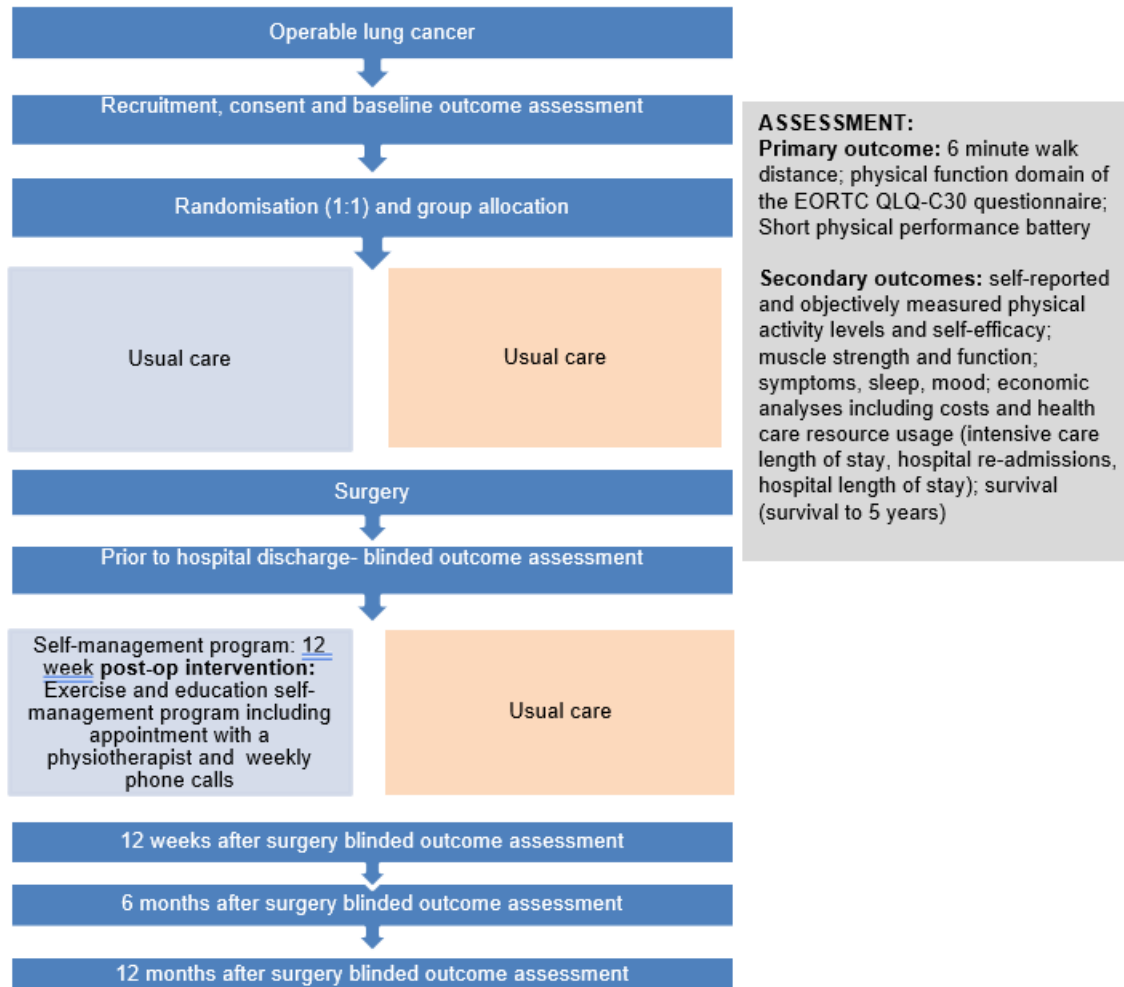

557

558 Figure 2: Trial time-line

559

### 560 5.3 RANDOMISATION

561 The randomisation list will be devised by the independent statistician and carried out  
562 through a central telephone service to ensure allocation concealment. Following consent  
563 and assessment, participants are randomised 1:1 (intervention or usual care).

564

### 565 5.4 STUDY METHODOLOGY

566 Procedure: Potentially eligible participants identified through weekly cancer multi-  
567 disciplinary team meetings/clinics at the hospitals. At recruitment participants provide  
568 written informed consent (if being recruited in person at the hospital) or Redcap e-consent  
569 (if consented by the doctor during their telehealth appointment), complete assessment  
570 and are randomly allocated off-site to ensure concealment (Figure 2). Reasons for attrition  
571 over the 12 month trial period will be collected and assessed.

572 Intervention methodology: Trained physiotherapists will provide the intervention. An  
573 intervention protocol will be developed to ensure standardization of the intervention. The  
574 intervention procedures will be strictly monitored for protocol adherence.

575 Blinding: Blinding of participants and therapists cannot be achieved due to the nature of  
576 the intervention. However, assessors blinded to allocation will undertake assessments.  
577 Assessor blinding will be assessed with a questionnaire. The usual care ward  
578 physiotherapist (who is not involved in the trial intervention) will be blinded to group  
579 allocation. Blinding of this physiotherapist will be assessed by a questionnaire.

580 Outcome measures: will be evaluated across the following time points: prior to surgery,  
581 before hospital discharge, 3 months post-operatively, 6 months post-operatively, and 12  
582 months post operatively. This testing will take up to 90 minutes per testing session. The  
583 outcomes and the outcome measures are described in section 4.2.

584

## 585 **6. STUDY POPULATION**

### 586 **6.1 RECRUITMENT PROCEDURE**

587 Consecutive patients will be screened from lists of patients reviewed at the lung cancer  
588 multi-disciplinary team weekly meeting and outpatient clinics (medical oncology,  
589 radiotherapy, respiratory lung mass and thoracic surgery) at each hospital. Participants  
590 may be recruited any time between time of presentation to the lung clinic/MDT meeting  
591 and surgery (this period of time is usually only a few weeks). Participant eligibility for  
592 inclusion will be confirmed by their surgeon or respiratory physician. Due to COVID-19  
593 many patients are now seen by their doctor(s) at the lung cancer outpatient clinics via  
594 telehealth. At recruitment participants will be asked to provide informed consent (via a  
595 hard copy of the PICF if attending the clinic in person, or via Red-cap e-consent if  
596 attending the clinic via telehealth), complete assessment and then be randomly allocated  
597 to the intervention or usual care arm off-site to ensure concealment (Figure 2).

598

### 599 **6.2 INCLUSION CRITERIA**

600 Eligible participants will include:

- 601 - Adults, aged 18 years or over
- 602 - Able to provide consent
- 603 - Planned to receive surgical treatment for non-small cell lung cancer
- 604 - Expected to be alive > 6 months
- 605 - Surgeon or physician approval
- 606 - Not currently meeting the physical activity guidelines (150 minutes of moderate  
607 intensity physical activity per week)
- 608 - Eastern Cooperate Oncology Group (ECOG) performance status of 0-2 at study entry

ECOG 0 Fully active

ECOG 1 Walking, but only can do light work

ECOG 2 Rest in bed LESS than half the day, do not work but can care for self

ECOG 3 Rest in bed MORE than half the day, and only partially cares for self

ECOG 4 Bedridden

### 609 **6.3 EXCLUSION CRITERIA**

610 Participants will be excluded if they satisfy any of the following criteria:

- 611 - Non-English speaking (insufficient English language skills to complete the  
612 questionnaires)

- 613 - Metastatic disease (stage IV lung cancer)
- 614 - Acute uncontrolled cardiovascular or respiratory issues
- 615 - Decompensated heart failure, severe aortic stenosis, uncontrolled arrhythmia, or acute
- 616 coronary syndrome
- 617 - Non-ambulant (for example: amputee, spinal cord injury, wheel-chair bound)
- 618 - ECOG performance status of 3 or 4 at study entry
- 619 - Cognitive impairment

## 620 6.4 CONSENT

621 For this trial, individual consent will be obtained from participants themselves. Potential  
622 participants will be asked to provide consent prior to participation (and prior to baseline  
623 outcome assessment and randomisation) (Figure 2). According to the National Statement  
624 on the Ethical Conduct in Human Research, participation will be voluntary and all  
625 information will be given to the participant in order to clarify the purposes, methods, risks  
626 and potential benefits of the research.

627 Due to COVID-19 and the transition to many hospital outpatient appointments being  
628 conducted via telehealth, as of 28 October 2021, we added an option for consent via  
629 Redcap e-consent for those patients who are attending their lung clinic medical/surgical  
630 appointments via telehealth to still allow them the option to participate in the trial.

631

## 632 6.5 LIMITATIONS

633 With the design of this trial it is not possible to blind the participants or the interventionists.  
634 We will ensure the assessors are blinded. Another potential limitation is selection bias in  
635 that participants who consent to the trial may be those who are interested in exercise.  
636 Another potential limitation is that participants in both groups may be encouraged to  
637 exercise based on their participation in this trial. We are recording their exercise levels  
638 and will carefully assess the level of exercise (including change) of participants in both  
639 groups throughout the study and report on this.

## 640 7. PARTICIPANT SAFETY AND WITHDRAWAL

### 641 7.1 RISK MANAGEMENT AND SAFETY

642 The tests and exercise program to be applied in this trial are unlikely to cause physical  
643 and/or psychological distress. The assessments will be performed by a trained  
644 physiotherapist who will be with the participant at all times. Participants may find the walk  
645 tests and functional tests tiring and the exercise programs as these are types of physical  
646 activity. Participants will be provided a rest between these tests. If a participant reports an  
647 injury associated with exercise they will be referred to their general practitioner for review.

### 648 7.2 HANDLING OF WITHDRAWALS

649 As with any physiotherapy assessment or treatment patients can choose not to have it. If  
650 the patient or their families request not to have physiotherapy assessment this decision  
651 will be respected. Based on current clinical practice we do not expect patients to request  
652 to be withdrawn from the study due to the assessment and intervention proposed. All  
653 assessment tools are safe and quick and testing at each time point will take a maximum of  
654 90 minutes. No adverse events are anticipated to occur during the protocol. If an adverse  
655 event does occur the surgeon will be notified immediately.

## 656 8. STATISTICAL METHODS



## 657 8.1 SAMPLE SIZE ESTIMATION & JUSTIFICATION

658 Sample size estimation: The sample size is based on a primary hypothesis that  
659 participants in the intervention arm will improve physical function measured by EORTC  
660 QLQ-C30 physical function domain compared to participants in usual care arm. A total  
661 sample size of 88 (44 per arm) provides 80% power with a two-sided alpha = 0.05 to  
662 detect a minimum difference of 12.9 in mean outcome between the two arms at follow-up,  
663 assuming a standard deviation of 21.3 (from our prior published data [64]). We will recruit  
664 112 participants, to allow for approximately 88 participants after 20% drop out (our current  
665 drop-out rate is 18%).

666 Feasibility: In July 2022 we finished recruitment of the 112 participants. Allowing for all  
667 patients to complete the final 12-month assessment, we predict the trial will complete  
668 participant data collection by June 2023. The final six months (second half of 2023) will be  
669 utilized for completion of data entry, data processing (ultrasound images), statistical  
670 analyses, trial reporting, and preparation for dissemination of results (conferences and  
671 publications).

672

## 673 8.2 STATISTICAL METHODS TO BE UNDERTAKEN

674 The statistical analysis plan for this trial is overseen by Dr Karen Lamb; and the health  
675 economics and cost effectiveness aspect is overseen by Michelle Tew.

676 All data analyses will be undertaken on an intention-to-treat approach, according to the  
677 intention-to-treat definition set by the FDA (the planned treatment regimen) rather than the  
678 actual treatment given. It has the consequence that subjects allocated to a treatment  
679 group should be followed up, assessed, and analyzed as members of that group  
680 irrespective of their compliance with the planned course of treatment. We expect missing  
681 data will be missing completely at random (MCAR) so missing data will be ignored unless  
682 otherwise specified. For the primary analysis, the distribution of mean change in EORTC  
683 QLQ-C30 physical function domain from baseline to 3 months will be compared between  
684 the two arms (intervention and usual care) using a Wilcoxon rank sum test. Participants  
685 will be excluded in this analysis if a participant's EORTC QLQ-C30 physical function data  
686 is not collected at either baseline or 3 months visit. Similar analyses will be performed for  
687 change from baseline to 6 and 12 months follow-up. For the secondary objectives, the  
688 effect of a self-management program intervention, measured by physical activity, muscle  
689 strength and function, exercise capacity, health-related quality of life, sleep and symptoms  
690 in patients with operable lung cancer will be analyzed using Wilcoxon rank sum test  
691 (continuous outcomes) and Fisher's exact test (binary outcomes). A detailed statistical  
692 analysis plan will be documented prior to data base lock

693 The health economic analysis will a healthcare system perspective. It will consider the  
694 implementation costs of the exercise and self-management program, compared with usual  
695 care in addition to the downstream cost differences associated with length of stay,  
696 complications and formal and informal care post-surgery. An incremental cost-  
697 effectiveness ratio will be constructed based on a cost per additional case of  
698 hospitalization averted. In addition utility data derived from the EQ-5D will be used to  
699 calculate a cost per quality adjusted life year (QALY) gained for the intervention group in  
700 comparison to standard care. Extensive one-way and probabilistic sensitivity analyses will  
701 be conducted to test the sensitivity of the results.

702 Qualitative data from interviews will be analysed using thematic analysis [61]. Interview  
703 data will be transcribed by one researcher and cross checked by another researcher. De-  
704 identified interview transcripts will be uploaded to NVivo 1.0 hosted by The University of

705 Melbourne for coding. NVivo files will be password protected and accessible only to the  
706 research team. Text will be read line by line and themes will be identified to best describe  
707 the views and responses of the group. Data will be coded in themes. The following  
708 questions will be considered: What are people saying? What are people feeling? What is  
709 really important? [62]. Member checking of interpreted data will be used as recommended  
710 by Creswell 2009 [63]. This form of member checking involves providing participants with  
711 a summary of the analysis of their interview transcript to determine if the interpretation is  
712 consistent with the participants' perspective.

## 713 **9. DATA SECURITY & HANDLING**

### 714 **9.1 DETAILS OF WHERE RECORDS WILL BE KEPT & HOW LONG WILL THEY BE** 715 **STORED**

716 Study data will be kept in a locked filing cabinet only accessible to researchers. All records  
717 will be kept for a minimum of 5 years post study closure.

### 718 **9.2 CONFIDENTIALITY AND SECURITY**

719 Study data (coded) will be stored in a secure and confidential manner. All participant data  
720 will be coded. Only the members of the research team will have access to the study  
721 database. Paper data will be kept in a locked filing cabinets in locked areas. Electronic  
722 versions will be kept on a password-protected database accessible only to the research  
723 team. This data will only be used for purposes of research. Only summary data will be  
724 published.

### 725 **9.3 ANCILLARY DATA**

726 Any muscle ultrasound images collected within this study will be de-identified with images  
727 assigned a code. It will not be possible to re-identify the participant the code will not be  
728 linked to a re-identifiable database. All images will be stored in a password protected  
729 database at RMH to ensure confidentiality. Data collected will be kept for a minimum of 5  
730 years post study closure at RMH.

731 Addition to plan (14 September 2022): The University of Kentucky collaborators (Dr Mayer  
732 and Dr Yuan Wen) have new software (MyoVision MKUS) which enables automated  
733 image analysis of the muscle ultrasound images to occur. This software was not available  
734 at the time of design of this study when the initial ethics application was submitted. The  
735 University of Kentucky will be provided with de-identified ultrasound images to 1) assess  
736 the accuracy and reliability of MyoVision MKUS in different patient populations including  
737 lung cancer using some of our samples. One of the researchers on our team (Dr Selina  
738 Parry) will manually analysed several images (as per the original plan). This analysis will  
739 compared against the automated analysis using the MyoVision MKUS software. If  
740 appropriate accuracy and reliability exists for our samples, all images from the cohort will  
741 then be automatically analysed using this software. No personal health information will be  
742 shared. Equal access and ownership of the data will occur between two collaborators.

743 We will transfer de-identified ultrasound images via One-drive which is only accessible to  
744 members of the research team.

745

746

## 747 **10. APPENDIX**

748

749 **List of Attachments included:**

| Document Name                                         |
|-------------------------------------------------------|
| Demographic data collection form                      |
| 6MWD testing procedure and recording sheet            |
| Muscle strength testing procedure and recording sheet |
| Participant questionnaires                            |
| Pre and post exercise intervention survey             |

750

751 **11. REFERENCES**

- 752 1. Australian Institute of Health and Welfare, *Cancer in Australia: an overview, 2014.*  
753 *Cancer series no. 78. Cat. no. CAN 75. Canberra: AIHW. 2014.*
- 754 2. Cancer Australia, *Report to the Nation - Lung Cancer 2011.* Cancer Australia,  
755 Sydney, NSW. 2011.
- 756 3. Cancer Council Australia, *Clinical practice guidelines for the prevention, diagnosis*  
757 *and management of lung cancer.* 2014.
- 758 4. Granger, C., et al., *Low physical activity levels and functional decline in individuals*  
759 *with lung cancer.* Lung Cancer, 2014. **83**(2): p. 292-299.
- 760 5. Granger, C., *Physiotherapy management of lung cancer.* Journal of Physiotherapy,  
761 2016. **62**(2): p. 60-67.
- 762 6. Lee, I.M., et al., *Effect of physical inactivity on major non-communicable diseases*  
763 *worldwide: an analysis of burden of disease and life expectancy.* Lancet, 2012.  
764 **380**(9838): p. 219-29.
- 765 7. American Cancer Society. *Cancer prevention and early detection facts and figures*  
766 *2012 2012* [cited Accessed February 2, 2014; Available from:  
767 [http://www.cancer.org/acs/groups/content/@epidemiologysurveillance/documents/d](http://www.cancer.org/acs/groups/content/@epidemiologysurveillance/documents/document/acspc-033423.pdf)  
768 [ocument/acspc-033423.pdf](http://www.cancer.org/acs/groups/content/@epidemiologysurveillance/documents/document/acspc-033423.pdf)
- 769 8. Schmitz, K., et al., *ACSM roundtable on exercise guidelines for cancer survivors.*  
770 *Medicine Science Sports Exercise*, 2010. **42**(7): p. 1409-1426.
- 771 9. WHO, *Global recommendations on physical activity for health.* Geneva: World  
772 Health Organization, 2010.
- 773 10. Schmitz, K., et al., *Controlled physical activity trials in cancer survivors: a*  
774 *systematic review and meta-analysis.* Cancer Epidemiol Biomarkers Prev, 2005.  
775 **14**(7): p. 1588-1595.
- 776 11. Meyerhardt, J., et al., *Physical activity and survival after colorectal cancer*  
777 *diagnosis.* Journal of Clinical Oncology, 2006. **24**(22): p. 3527-3534.
- 778 12. Ibrahim, E. and A. Al-Homaidh, *Physical activity and survival after breast cancer*  
779 *diagnosis: meta-analysis of published studies.* Medical Oncology, 2011. **28**(3): p.  
780 753-765.
- 781 13. Granger, C.L., et al., *Physical activity measured using global positioning system*  
782 *tracking in non-small cell lung cancer: An observational study.* Integrative Cancer  
783 Therapies, 2014. **13**(6): p. 482-492.
- 784 14. Spruit, M.A., et al., *An official American thoracic society/European respiratory*  
785 *society statement: Key concepts and advances in pulmonary rehabilitation.*  
786 *American Journal of Respiratory and Critical Care Medicine*, 2013. **188**(8): p. e13-  
787 e64.
- 788 15. Granger, C., et al., *Implementation of the physical activity guidelines in lung*  
789 *cancer: The CAPACITY study.* European Respiratory Journal, 2016. **48**(suppl 60).

- 790 16. Granger, C.L., et al., *Understanding factors influencing physical activity and*  
791 *exercise in lung cancer: a systematic review.* Supportive Care in Cancer, 2017.  
792 **25**(3): p. 983-999.
- 793 17. Granger, C.L., et al., *Barriers to Translation of Physical Activity into the Lung*  
794 *Cancer Model of Care. A Qualitative Study of Clinicians' Perspectives.* Ann Am  
795 Thorac Soc, 2016. **13**(12): p. 2215-2222.
- 796 18. Aaronson, N., et al., *The European Organization for Research and Treatment of*  
797 *Cancer QLQ-C30: a quality-of-life instrument for use in international clinical trials in*  
798 *oncology.* Journal of the National Cancer Institute, 1993. **85**(5): p. 365-376.
- 799 19. Granger, C., et al., *Minimal important difference of the 6-minute walk distance in*  
800 *lung cancer.* Chronic Respiratory Disease, 2015. **12**(2): p. 146.
- 801 20. Singh, S.J., et al., *An official systematic review of the European Respiratory*  
802 *Society/American Thoracic Society: measurement properties of field walking tests*  
803 *in chronic respiratory disease.* The European Respiratory Journal, 2014. **44**(6): p.  
804 1447-1478.
- 805 21. Holland, A.E., et al., *An official European Respiratory Society/American Thoracic*  
806 *Society technical standard: field walking tests in chronic respiratory disease.* The  
807 European Respiratory Journal, 2014. **44**(6): p. 1428-1446.
- 808 22. Guralnik, J.M., et al., *A short physical performance battery assessing lower*  
809 *extremity function: association with self-reported disability and prediction of*  
810 *mortality and nursing home admission.* J Gerontol, 1994. **49**(2): p. M85-94.
- 811 23. Bergman, B., et al., *The EORTC QLQ-LC13: a modular supplement to the EORTC*  
812 *Core Quality of Life Questionnaire (QLQ-C30) for use in lung cancer clinical trials.*  
813 *EORTC Study Group on Quality of Life.* European Journal of Cancer, 1994.  
814 **30A**(5): p. 635-642.
- 815 24. Fayers, P., et al., *EORTC QLQ-C30 Scoring Manual (3rd edition).* Published by:  
816 *European Organisation for Research and Treatment of Cancer, Brussels.* . 2001.
- 817 25. Hjermstad, M., et al., *Test-Retest Study of the European Organization for*  
818 *Research and Treatment of Cancer Core Quality-of-Life Questionnaire.* Journal of  
819 Clinical Oncology, 1995. **13**(5): p. 1254.
- 820 26. American Thoracic Society, *ATS statement: guidelines for the six-minute walk test.*  
821 *American Journal of Respiratory and Critical Care Medicine*, 2002. **166**: p. 111-  
822 117.
- 823 27. Alison, J., et al., *Repeatability of the Six-Minute Walk Test and Relation to Physical*  
824 *Function in Survivors of a Critical Illness.* Physical Therapy, 2012. **92**(12): p. 1556-  
825 1563.
- 826 28. Solway, S., et al., *A qualitative systematic overview of the measurement properties*  
827 *of functional walk tests used in the cardiorespiratory domain.* Chest 2001. **119**(1):  
828 p. 256-270.
- 829 29. Jenkins, S.C., *6-Minute walk test in patients with COPD: clinical applications in*  
830 *pulmonary rehabilitation.* Physiotherapy 2007. **93**(3): p. 175-182.
- 831 30. Bellet, N., L. Adams, and N. Morris, *Systematic review: The 6-minute walk test in*  
832 *outpatient cardiac rehabilitation: validity, reliability and responsiveness—a*  
833 *systematic review.* Physiotherapy, 2012.
- 834 31. Sadaria, K. and R. Bahannon, *The 6-Minute Walk Test: A Brief Review of*  
835 *Literature.* Clinical Exercise Physiology, 2001. **3**(3): p. 127.
- 836 32. Guyatt, G.H., et al., *How should we measure function in patients with chronic heart*  
837 *and lung disease?* Journal of Chronic Diseases, 1985. **38**(6): p. 517-524.
- 838 33. Andersson, M., et al., *Measuring walking speed in COPD: test-retest reliability of*  
839 *the 30-metre walk test and comparison with the 6-minute walk test.* Primary Care  
840 Respiratory Journal, 2011. **20**(4): p. 434-440.
- 841 34. Puhan, M., *Interpretation of treatment changes in 6-minute walk distance in*  
842 *patients with COPD.* European Respiratory Journal, 2008. **32**(3): p. 637.
- 843 35. Portney, L. and M. Watkins, *Foundations of clinical research applications to*  
844 *practice.* 2nd ed. 2000, Upper Saddle River, New Jersey: Prentice Hall.
- 845 36. Guralnik, J.M., et al., *Lower-Extremity Function in Persons over the Age of 70*  
846 *Years as a Predictor of Subsequent Disability.* New England Journal of Medicine,  
847 1995. **332**(9): p. 556-561.

- 848 37. Mentiplay, B.F., et al., *Assessment of Lower Limb Muscle Strength and Power*  
849 *Using Hand-Held and Fixed Dynamometry: A Reliability and Validity Study*. PLOS  
850 ONE, 2015. **10**(10): p. e0140822.
- 851 38. Puthuchery, Z., *Acute Skeletal Muscle Wasting in Critical Illness*. JAMA, 2013.  
852 **310**(15).
- 853 39. Craig, C.L., et al., *International physical activity questionnaire: 12-country reliability*  
854 *and validity*. Medicine & Science in Sports & Exercise, 2003. **35**(8): p. 1381-1395.
- 855 40. Rogers, et al., *Exercise barrier and task self-efficacy in breast cancer patients*  
856 *during treatment*. Support Care Cancer, 2006. **14**: p. 84-90.
- 857 41. McAuley, E. and S. Mihalko, *Advances in sports and exercise psychology*  
858 *measurement*. . 1998: Morgantown, WV: Fitness Information Technology, Inc.
- 859 42. Yu, L., et al., *Development of short forms from the PROMIS sleep disturbance and*  
860 *Sleep-Related Impairment item banks*. Behav Sleep Med, 2011. **10**(1): p. 6-24.
- 861 43. Mendoza, T.R., et al., *The rapid assessment of fatigue severity in cancer patients:*  
862 *use of the Brief Fatigue Inventory*. Cancer, 1999. **85**(5): p. 1186-96.
- 863 44. Bjelland, I., et al., *The validity of the Hospital Anxiety and Depression Scale - An*  
864 *updated literature review*. Journal of Psychosomatic Research, 2002. **52**(2): p. 69-  
865 77.
- 866 45. Mitchell, A., *Diagnostic validity of the Hospital Anxiety and Depression Scale*  
867 *(HADS) in cancer and palliative settings: A meta-analysis*. Journal of Affective  
868 Disorders, 2010.
- 869 46. Lockett, T., et al., *A review and recommendations for optimal outcome measures*  
870 *of anxiety, depression and general distress in studies evaluating psychosocial*  
871 *interventions for English-speaking adults with heterogeneous cancer diagnoses*.  
872 Supportive Care in Cancer, 2010. **18**(10): p. 1241-1262.
- 873 47. Zigmond, A.S. and R.P. Snaith, *The hospital anxiety and depression scale*. Acta  
874 Psychiatr Scand, 1983. **67**(6): p. 361-70.
- 875 48. Roth, A., et al., *Rapid screening for psychologic distress in men with prostate*  
876 *carcinoma: a pilot study*. Cancer, 1998. **82**(10): p. 1904-1908.
- 877 49. de Souza, J.A., et al., *The development of a financial toxicity patient-reported*  
878 *outcome in cancer: The COST measure*. Cancer, 2014. **120**(20): p. 3245-53.
- 879 50. de Souza, J.A., et al., *Measuring financial toxicity as a clinically relevant patient-*  
880 *reported outcome: The validation of the COmprehensive Score for financial*  
881 *Toxicity (COST)*. Cancer, 2017. **123**(3): p. 476-484.
- 882 51. Kamdar, D.B.B., et al., *Joblessness and Lost Earnings After ARDS in a 1-Year*  
883 *National Multicenter Study*. American Journal of Respiratory and Critical Care  
884 Medicine. **0**(ja): p. null.
- 885 52. Janssen, M.F., et al., *Measurement properties of the EQ-5D-5L compared to the*  
886 *EQ-5D-3L across eight patient groups: a multi-country study*. Quality of Life  
887 Research, 2013. **22**(7): p. 1717-1727.
- 888 53. Rock, C., et al., *Nutrition and physical activity guidelines for cancer survivors*. CA:  
889 A Cancer Journal of Clinicians, 2013. **62**(4): p. 242-274.
- 890 54. Michie, S., M. van Stralen, and R. West, *The behavioural change wheel: A new*  
891 *method for characterising and designing behavioural change interventions*.  
892 Implementation Science, 2011. **6**(42).
- 893 55. Gale, J. and H. Skouteris, *Health coaching: Facilitating health behaviour change*  
894 *for chronic condition prevention and self-management*, in *Handbook of Applied*  
895 *Topics in Health Psychology*, M. Caltabiano and L. Ricciardelli, Editors. 2012,  
896 Wiley-Blackwell.
- 897 56. Gale, J., *A practical guide to health behaviour change using the HCA approach*.  
898 2012, Health Change Australia: Sydney, Australia.
- 899 57. Demark-Wahnefried, W. and L.W. Jones, *Promoting a healthy lifestyle among*  
900 *cancer survivors*. Hematol Oncol Clin North Am, 2008. **22**(2): p. 319-42, viii.
- 901 58. Inglis, S.C., et al., *Which components of heart failure programmes are effective? A*  
902 *systematic review and meta-analysis of the outcomes of structured telephone*  
903 *support or telemonitoring as the primary component of chronic heart failure*  
904 *management in 8323 patients: Abridged Cochrane Review*. Eur J Heart Fail, 2011.  
905 **13**(9): p. 1028-40.

- 906 59. Clark, M., et al., *Motivational readiness for physical activity and quality of life in*  
907 *long-term lung cancer survivors*. Lung Cancer, 2008. **61**(1): p. 117-122.
- 908 60. Granger, C.L., et al., *Low physical activity levels and functional decline in*  
909 *individuals with lung cancer*. Lung Cancer, 2014. **83**(2): p. 292-299.
- 910 61. Attride-Stirling, J., *Thematic Networks: an analytical tool for qualitative research*  
911 *Qualitative Research*, 2001. **1**(3): p. 385-405.
- 912 62. Song, Y., Liu, D., Chen, Y., He, G., *Using focus groups to design a*  
913 *psychoeducation program for patients with schizophrenia and their family*  
914 *members*. Int J Clin Exp Med, 2014. **7**(1): p. 177-185.
- 915 63. Creswell, J.W., *Research design: Qualitative, quantitative, and mixed methods*  
916 *approaches*. 2009: Thousand Oaks, CA: Sage.
- 917 64. Granger CL, Irving L, Antippa P, Edbrooke L, Parry SM, Krishnasamy M, Denehy L.  
918 CAPACITY: A physical activity self-management program for patients undergoing  
919 surgery for lung cancer, a phase I feasibility study. Lung Cancer. 2018  
920 Oct;124:102-109. doi: 10.1016/j.lungcan.2018.07.034.

921

922

923 **1.2 Amendments to original protocol, including pauses to recruitment due to COVID-19 during**  
 924 **screening period**

| Date                           | Nature of amendment                                                                                                                                                                                                                                                                                                                                                                                                                                                                                                                                                                 | Reason for amendment                                                                                                                                                                                                                                                                                                       |
|--------------------------------|-------------------------------------------------------------------------------------------------------------------------------------------------------------------------------------------------------------------------------------------------------------------------------------------------------------------------------------------------------------------------------------------------------------------------------------------------------------------------------------------------------------------------------------------------------------------------------------|----------------------------------------------------------------------------------------------------------------------------------------------------------------------------------------------------------------------------------------------------------------------------------------------------------------------------|
| 1 <sup>st</sup> December 2017  | Updated methodology related to quadriceps muscle ultrasound measurement: Quadriceps muscle ultrasound measures to be completed day 1 post-surgery before the patient is randomised.                                                                                                                                                                                                                                                                                                                                                                                                 | Initially the protocol included quadriceps muscle ultrasound to be completed pre-surgery but this was deemed not feasible and the timing changed to immediately post-operative.<br><br>Note: these data contribute to a secondary analysis and are not reported in the main trial paper. Data will be reported separately. |
| 23 <sup>rd</sup> March 2020    | Recruitment paused for trial                                                                                                                                                                                                                                                                                                                                                                                                                                                                                                                                                        | Due to COVID-19, we were required to pause participant recruitment.                                                                                                                                                                                                                                                        |
| 6 <sup>th</sup> January 2021   | Correction to intervention description to more clearly describe that there is one initial face to face appointment (consultation) with the physiotherapist on the ward after surgery before discharge (not two sessions). The session can be split over two days if needed, but the standardised intervention provides one session for patients after surgery before they are discharged home (usually 3-4 days later). Additionally, the word 'pamphlet' was replaced with 'booklet' to more accurately reflect the information to be given to patients given it is 10 pages long. | On reflection it was noted these descriptions were not clear in the protocol and hence the wording was updated. There was an initial error referring to a pre-operative consultation which was not part of the intervention in the current trial.                                                                          |
| 12 <sup>th</sup> February 2021 | Recruitment resumed for trial                                                                                                                                                                                                                                                                                                                                                                                                                                                                                                                                                       | Due to easing of COVID-19 restrictions, we were permitted to resume recruitment.                                                                                                                                                                                                                                           |
| 12 <sup>th</sup> February 2021 | In-person assessments windows widened from +/- 14 days to +/- 28 days                                                                                                                                                                                                                                                                                                                                                                                                                                                                                                               | Due to COVID-19, assessment windows were widened to allow increased possibility of completing in-person assessments outside of any periods of isolation.                                                                                                                                                                   |
| 13 <sup>th</sup> May 2021      | Updated methodology related to qualitative interviews. Qualitative interviews were planned to be conducted on a sub-set of participants allocated to the intervention group (changes made prior to commencement of recruitment into this sub-study). Changes to                                                                                                                                                                                                                                                                                                                     | Change to timing to allow interviews to occur soon after completion of the intervention period to reduce the limit of recall bias.<br><br>Change to allow videoconferencing for interviews due to COVID-19.                                                                                                                |

|                                 |                                                                                                                                                                                                                                                                                                                                                                                                                                                                                                                                                                                                                                                                                                                                                                                                                                                                                                                                                                                                                                                                                                                                                                                                                                                                                        |                                                                                                                                                                                                                                                                                                                                                                                                                                                                                                                                                                                                                                                                                                                                                                                                                                                                                                                                                                                                                                                                                               |
|---------------------------------|----------------------------------------------------------------------------------------------------------------------------------------------------------------------------------------------------------------------------------------------------------------------------------------------------------------------------------------------------------------------------------------------------------------------------------------------------------------------------------------------------------------------------------------------------------------------------------------------------------------------------------------------------------------------------------------------------------------------------------------------------------------------------------------------------------------------------------------------------------------------------------------------------------------------------------------------------------------------------------------------------------------------------------------------------------------------------------------------------------------------------------------------------------------------------------------------------------------------------------------------------------------------------------------|-----------------------------------------------------------------------------------------------------------------------------------------------------------------------------------------------------------------------------------------------------------------------------------------------------------------------------------------------------------------------------------------------------------------------------------------------------------------------------------------------------------------------------------------------------------------------------------------------------------------------------------------------------------------------------------------------------------------------------------------------------------------------------------------------------------------------------------------------------------------------------------------------------------------------------------------------------------------------------------------------------------------------------------------------------------------------------------------------|
|                                 | <p>protocol: interviews will occur at 3 months post-operatively instead of 6 months post-operatively; interviews can be conducted in-person or via video-conferencing (rather than only as an in-person option); and sample size for interviews changed to 'until data saturation is reached' rather than pre-set of 15 participants.</p>                                                                                                                                                                                                                                                                                                                                                                                                                                                                                                                                                                                                                                                                                                                                                                                                                                                                                                                                              | <p>Sample size for interviews updated according to best practice that interviews continue until data saturation rather than a pre-determined set of n=15 as previously noted.</p> <p>Note: these data contribute to a secondary analysis and are not reported in the main trial paper. Data will be reported separately.</p>                                                                                                                                                                                                                                                                                                                                                                                                                                                                                                                                                                                                                                                                                                                                                                  |
| 20 <sup>th</sup> August 2021    | Recruitment paused for trial                                                                                                                                                                                                                                                                                                                                                                                                                                                                                                                                                                                                                                                                                                                                                                                                                                                                                                                                                                                                                                                                                                                                                                                                                                                           | Due to COVID-19, we were required to pause participant recruitment                                                                                                                                                                                                                                                                                                                                                                                                                                                                                                                                                                                                                                                                                                                                                                                                                                                                                                                                                                                                                            |
| 17 <sup>th</sup> September 2021 | Recruitment resumed for trial                                                                                                                                                                                                                                                                                                                                                                                                                                                                                                                                                                                                                                                                                                                                                                                                                                                                                                                                                                                                                                                                                                                                                                                                                                                          | Due to easing of COVID-19 restrictions, we were permitted to resume recruitment.                                                                                                                                                                                                                                                                                                                                                                                                                                                                                                                                                                                                                                                                                                                                                                                                                                                                                                                                                                                                              |
| 5 <sup>th</sup> October 2021    | <p>In preparing the trial protocol for publication, the planned statistical analyses were refined. The updated version stated: "A constrained longitudinal data analysis model will be used to analyse the primary outcome (EORTC QLQ c30) across all time points (baseline, 3, 6 and 12 months after surgery), with study group, time point and a study group by time point interaction, and recruitment site included in the model. The model will be restricted to have a common baseline mean score across the study groups based on the assumption that there are no differences in the mean outcome between groups at baseline due to randomisation. The absolute difference in mean change in EORTC QLQ c30 physical function domain from baseline between groups will be estimated (including two-sided 95% confidence interval) at 3-months after surgery (primary time point). The constrained longitudinal data analysis model provides valid inference if the missing data mechanism is at most missing at random. Similar analyses will be conducted for the secondary outcomes. The complier average causal effect will be estimated in primary outcome analyses, in addition to the intention-to-treat effect, using collected adherence data. Heterogeneity of the</p> | <p>Previous version stated: "For the primary analysis, the EORTC QLQ-C30 physical function domain at 3 months will be compared between the two arms (intervention and usual care) controlling for EORTC QLQ-C30 at baseline and the hospital site (used to stratify the randomisation) using ANCOVA. Prior to analysis, tests for normality will be undertaken and if the assumptions are violated, non-parametric (bootstrapping) methods will be used. For the secondary objectives, the effect of the intervention, measured by physical activity levels and self-efficacy, physical function, muscle strength and function, exercise capacity, health-related quality of life, sleep and symptoms in patients with operable lung cancer, similar analyses will be performed at 3 month follow-up. To evaluate whether primary and secondary outcomes are maintained over time (3 and 6 months; quality of life to 12 months), a mixed-effects linear model adjusting for baseline will be performed. A detailed statistical analysis plan will be documented prior to data base lock"</p> |



|                               |                                                                                                                                                                                                                                                                                                                                                                                                                                                          |                                                                                                                                                                                                                                                                                                                               |
|-------------------------------|----------------------------------------------------------------------------------------------------------------------------------------------------------------------------------------------------------------------------------------------------------------------------------------------------------------------------------------------------------------------------------------------------------------------------------------------------------|-------------------------------------------------------------------------------------------------------------------------------------------------------------------------------------------------------------------------------------------------------------------------------------------------------------------------------|
|                               | <p>intervention effect according to post-operative cancer treatment (no post-operative treatment/post-operative chemotherapy, radiotherapy or chemoradiotherapy) will be assessed in exploratory analyses by including interactions between post-operative treatment and study group. The number and percentage of participants with adverse events will be summarised by study group. A health economic analysis run alongside the clinical trial.”</p> |                                                                                                                                                                                                                                                                                                                               |
| 28 <sup>th</sup> October 2021 | <p>Addition of option for e-consent via Redcap</p>                                                                                                                                                                                                                                                                                                                                                                                                       | <p>Due to COVID-19 many hospital outpatient appointments were converted to telehealth. Protocol amended to add an option for consent via Redcap e-consent for those patients who are attending their lung clinic medical/surgical appointments via telehealth to still allow them the option to participate in the trial.</p> |

926 **1.3 Statistical Analysis Plan (SAP)**

927

928

929

**HREC 2017.152**

**Statistical Analysis Plan**

Protocol V6 23August2022

931

932

933

934

935

936 **Protocol HREC 2017.152 V6 14 September 2022**

937 **ACTRN12617001283369**

938

939

940 **Cancer And Physical ACTivity (CAPACITY) trial:**

941 **A randomised control trial of exercise and**

942 **self-management for people with lung cancer**

943

944

945 **Statistical Analysis Plan**

946

947

948

949

950 **Document Version History**

| Version Date                   | Version | Author/s      | Signature                                                                           | Change Description | Reason/Comment                                                                                            |
|--------------------------------|---------|---------------|-------------------------------------------------------------------------------------|--------------------|-----------------------------------------------------------------------------------------------------------|
| 18 <sup>th</sup> August 2023   | 1       | Diana Zannino |  | Initial release.   | Not applicable.                                                                                           |
| 14 <sup>th</sup> December 2023 | 2       | Diana Zannino |  |                    | Addition of the consideration of using multiple imputation if 3-month data on primary outcome is missing. |
|                                |         |               |                                                                                     |                    |                                                                                                           |

951

952

953

|                     |                                                         |
|---------------------|---------------------------------------------------------|
| CHIEF INVESTIGATOR  | A/Prof Catherine Granger<br>Royal Melbourne Hospital    |
| TRIAL STATISTICIANS | Diana Zannino and Karen Lamb<br>University of Melbourne |

954 **Trial personnel**

955

956

957 **SAP Signatures**

958 I give my approval for the attached SAP entitled CAPACITY dated <SAP VERSION DATE>

959 **Chief Investigator**

| Name / Affiliation                                   | Signature                                                                         | Date     |
|------------------------------------------------------|-----------------------------------------------------------------------------------|----------|
| A/Prof Catherine Granger<br>(Principal investigator) |  | 14/12/23 |

960

961 **SAP Authors**

| Name / Affiliation                                                          | Signature                                                                           | Date       |
|-----------------------------------------------------------------------------|-------------------------------------------------------------------------------------|------------|
| Prof Julie Simpson on behalf<br>of Prof Karen Lamb<br>(Senior statistician) |  | 14/12/2023 |
| Ms Diana Zannino<br>(Trial statistician)                                    |  | 14/12/2023 |

962

963

964

965

966

967 **Table of Contents**

|      |                                                                                    |    |
|------|------------------------------------------------------------------------------------|----|
| 968  | <a href="#">List of Abbreviations</a> .....                                        | 39 |
| 969  | <a href="#">1 Introduction</a> .....                                               | 40 |
| 970  | <a href="#">1.1 Preface</a> .....                                                  | 40 |
| 971  | <a href="#">1.2 Purpose of the SAP</a> .....                                       | 40 |
| 972  | <a href="#">2 Study Objectives and Endpoints</a> .....                             | 41 |
| 973  | <a href="#">2.1 Study Objectives and Hypotheses</a> .....                          | 41 |
| 974  | <a href="#">2.2 Outcome measures</a> .....                                         | 41 |
| 975  | <a href="#">2.3 Safety outcomes</a> .....                                          | 42 |
| 976  | <a href="#">2.4 Other outcomes</a> .....                                           | 42 |
| 977  | <a href="#">3 Study Methods</a> .....                                              | 43 |
| 978  | <a href="#">3.1 Study Design and Plan</a> .....                                    | 43 |
| 979  | <a href="#">3.2 Intervention groups</a> .....                                      | 44 |
| 980  | <a href="#">3.3 Inclusion-Exclusion Criteria</a> .....                             | 44 |
| 981  | <a href="#">3.4 Randomisation and Blinding</a> .....                               | 45 |
| 982  | <a href="#">3.5 Sample Size</a> .....                                              | 45 |
| 983  | <a href="#">3.6 Study Visit Schedule</a> .....                                     | 46 |
| 984  | <a href="#">3.7 Outcome Variables</a> .....                                        | 47 |
| 985  | <a href="#">3.7.1 Physical function</a> .....                                      | 48 |
| 986  | <a href="#">3.7.2 Health-related quality of life and symptoms</a> .....            | 49 |
| 987  | <a href="#">3.7.3 Functional exercise capacity</a> .....                           | 51 |
| 988  | <a href="#">3.7.4 Muscle strength</a> .....                                        | 51 |
| 989  | <a href="#">3.7.5 Physical activity levels</a> .....                               | 52 |
| 990  | <a href="#">3.7.6 Self-efficacy for physical activity</a> .....                    | 53 |
| 991  | <a href="#">3.7.7 Fatigue</a> .....                                                | 53 |
| 992  | <a href="#">3.7.8 Distress</a> .....                                               | 53 |
| 993  | <a href="#">3.7.9 Sleep</a> .....                                                  | 54 |
| 994  | <a href="#">3.7.10 Financial toxicity</a> .....                                    | 54 |
| 995  | <a href="#">3.7.11 Return to work/Return to usual activities</a> .....             | 55 |
| 996  | <a href="#">3.7.12 Survival</a> .....                                              | 55 |
| 997  | <a href="#">3.7.13 Hospital re-admissions</a> .....                                | 55 |
| 998  | <a href="#">3.7.14 Outcomes not being covered in the main study analysis</a> ..... | 55 |
| 999  | <a href="#">4 General Considerations</a> .....                                     | 55 |
| 1000 | <a href="#">4.1 Timing of Final Analysis</a> .....                                 | 55 |
| 1001 | <a href="#">4.2 Analysis Populations</a> .....                                     | 56 |
| 1002 | <a href="#">4.2.1 Full Analysis/Randomised Population</a> .....                    | 56 |
| 1003 | <a href="#">4.2.2 Per Protocol Population</a> .....                                | 57 |
| 1004 | <a href="#">4.2.3 Safety Population</a> .....                                      | 57 |
| 1005 | <a href="#">4.3 Covariates and Subgroups</a> .....                                 | 57 |
| 1006 | <a href="#">4.3.1 Covariates</a> .....                                             | 57 |
| 1007 | <a href="#">4.3.2 Subgroups</a> .....                                              | 57 |
| 1008 | <a href="#">4.4 Missing Data</a> .....                                             | 57 |
| 1009 | <a href="#">4.5 Interim Analyses and Data Monitoring</a> .....                     | 57 |
| 1010 | <a href="#">4.6 Multi-centre Studies</a> .....                                     | 58 |
| 1011 | <a href="#">4.7 Multiple Testing</a> .....                                         | 58 |
| 1012 | <a href="#">4.8 Estimand Framework</a> .....                                       | 58 |
| 1013 | <a href="#">5 Summary of Study Data</a> .....                                      | 59 |
| 1014 | <a href="#">5.1 Subject Disposition</a> .....                                      | 59 |
| 1015 | <a href="#">5.2 Derived variables</a> .....                                        | 59 |
| 1016 | <a href="#">5.3 Protocol deviations and violations</a> .....                       | 59 |
| 1017 | <a href="#">5.4 Baseline Demographic Variables</a> .....                           | 59 |
| 1018 | <a href="#">5.5 Treatment Compliance</a> .....                                     | 60 |
| 1019 | <a href="#">6 Efficacy Analyses</a> .....                                          | 61 |
| 1020 | <a href="#">6.1 Primary Efficacy Analysis</a> .....                                | 61 |

|      |                       |                                                                                  |    |
|------|-----------------------|----------------------------------------------------------------------------------|----|
| 1021 | <a href="#">6.2</a>   | <a href="#">Secondary Efficacy Analyses</a> .....                                | 61 |
| 1022 | <a href="#">6.3</a>   | <a href="#">Estimand-to-analysis for primary and secondary objectives</a> .....  | 62 |
| 1023 | <a href="#">6.4</a>   | <a href="#">Exploratory Efficacy Analyses</a> .....                              | 65 |
| 1024 | <a href="#">6.4.1</a> | <a href="#">Complier average causal effect</a> .....                             | 65 |
| 1025 | <a href="#">6.4.2</a> | <a href="#">Subgroup analyses</a> .....                                          | 65 |
| 1026 | <a href="#">7</a>     | <a href="#">Safety Analyses</a> .....                                            | 65 |
| 1027 | <a href="#">7.1</a>   | <a href="#">Adverse Events</a> .....                                             | 65 |
| 1028 | <a href="#">7.2</a>   | <a href="#">Serious Adverse Events</a> .....                                     | 66 |
| 1029 | <a href="#">8</a>     | <a href="#">Figures</a> .....                                                    | 66 |
| 1030 | <a href="#">9</a>     | <a href="#">Reporting Conventions</a> .....                                      | 66 |
| 1031 | <a href="#">10</a>    | <a href="#">Technical Details</a> .....                                          | 66 |
| 1032 | <a href="#">11</a>    | <a href="#">Summary of Changes to the Protocol</a> .....                         | 66 |
| 1033 |                       | <a href="#">Appendix A – Table and Figure Listing for the Final Report</a> ..... | 67 |
| 1034 |                       | <a href="#">Appendix B – Templates for tables and figures</a> .....              | 68 |
| 1035 |                       | <a href="#">Appendix C – Data Mapping to Database</a> .....                      | 81 |
| 1036 |                       |                                                                                  |    |
| 1037 |                       |                                                                                  |    |

1038

## LIST OF ABBREVIATIONS

|           |                                                                                                |
|-----------|------------------------------------------------------------------------------------------------|
| AE        | Adverse Event                                                                                  |
| BFI       | Brief Fatigue Inventory                                                                        |
| CACE      | Complier Average Causal Effects                                                                |
| CI        | Confidence Interval                                                                            |
| CONSORT   | Consolidated Standards of Reporting Trials                                                     |
| COPD      | Chronic Obstructive Pulmonary Disease                                                          |
| COST      | COmprehensive Score for financial Toxicity                                                     |
| DLCO      | Diffusing capacity of the lungs for carbon monoxide                                            |
| ECOG-PS   | Eastern Cooperate Oncology Group - Performance Status                                          |
| EORTC-QLQ | European Organization for the Research and Treatment of Cancer - Quality of Life Questionnaire |
| FEV1      | Forced Expiratory Volume in the first second                                                   |
| FVC       | Forced Vital Capacity                                                                          |
| HRQoL     | Health-Related Quality of Life                                                                 |
| ICH       | International Council for Harmonisation                                                        |
| IPAQ-SF   | International Physical Activity Questionnaire Short Form                                       |
| LC        | Lung Cancer                                                                                    |
| MAR       | Missing At Random                                                                              |
| MET       | Metabolic Equivalent Tasks                                                                     |
| NSCLC     | Non-Small Cell Lung Cancer                                                                     |
| PVD       | Peripheral Vascular Disease                                                                    |
| REDCap    | Research Electronic Data Capture                                                               |
| SAE       | Serious Adverse Event                                                                          |
| SAP       | Statistical Analysis Plan                                                                      |
| SD        | Standard Deviation                                                                             |
| SPIRIT    | Standard Protocol Items: Recommendations for Interventional Trials                             |
| SPPB      | Short Physical Performance Battery                                                             |
| TIDieR    | Template for Intervention Description and Replication                                          |
| 6MWD      | 6-Minute Walk Distance                                                                         |

1039

1040

1041

1042 **1. INTRODUCTION**

1043 **1.1 Preface**

1044 The majority of people with operable lung cancer now survive yet they suffer significant physical  
1045 hardship. New models of care are required to minimise morbidity for this large and vulnerable  
1046 group. This project will test the benefit of an exercise and education self-management program,  
1047 compared to usual care, for people undergoing surgery for lung cancer to improve their physical  
1048 function and functional recovery. The project will involve a planned sample of 112 people  
1049 undergoing surgery for lung cancer in Victoria, Australia. Participants will be randomised before  
1050 surgery to either the intervention arm (exercise and education self-management program) or the  
1051 usual care (no exercise program) arm. Participants in both arms will receive usual medical, nursing  
1052 and allied health care. In addition to usual care, participants in the intervention arm will receive  
1053 an exercise and education self-management program. The program consists of one to two  
1054 appointments with a physiotherapist (before hospital discharge post-operatively). Additionally,  
1055 the patient will receive weekly phone calls up to 12 weeks after surgery to promote adherence to  
1056 physical activity goals, discuss barriers/issues with their exercise and progress their exercise  
1057 program. The intervention is designed to be equitable and inclusive of rural patients, as  
1058 measurement and intervention appointments are timed with surgical consults and the additional  
1059 intervention is phone-based. Participants in both arms will undergo a battery of tests with a  
1060 blinded assessor including measurement of physical function, quality of life and physical activity  
1061 prior to surgery, at hospital discharge, and at 12 weeks, 6 months and 12 months post-surgery.  
1062 This study will provide important information on the benefit of an exercise-based intervention for  
1063 people with lung cancer.

1064 **1.2 Purpose of the SAP**

1065 The purpose of this Statistical Analysis Plan (SAP) is to outline the pre-planned analyses to be  
1066 completed to support the main publication of the CAPACITY trial. Versions of the SAP will be  
1067 tracked until unblinding and thereafter, with a clear distinction between the changes before and  
1068 after unblinding. Any analyses not identified in the SAP after breaking of the study blind will be  
1069 clearly identified as such in the main publication and will be considered post-hoc. This SAP  
1070 excludes the description of the analysis of the economic data (European Quality of Life  
1071 Instrument, healthcare resource usage, cost of delivering intervention) collected as part of the  
1072 study which will be documented separately.

1073



## 1074 2 STUDY OBJECTIVES AND ENDPOINTS

### 1075 2.1 Study Objectives and Hypotheses

1076 The primary objective of this study is:

- 1077 • to evaluate the effect of a self-management program (exercise and education) on physical  
1078 function at 3 months post-operative in patients with operable lung cancer compared with  
1079 usual care (control).

1080 *Hypothesis 1: The self-management program compared with usual care will improve*  
1081 *physical function at three months after surgery.*

1082 The secondary objectives are:

- 1083 • To assess the effect of a self-management program (exercise and education) on physical  
1084 function, physical activity (levels and self-efficacy), muscle strength and function, health-  
1085 related quality of life (HRQoL), fatigue, sleep, symptoms, distress, financial toxicity,  
1086 survival and return to work/usual activities in patients with operable lung cancer  
1087 compared with usual care (control).

1088 *Hypothesis 2: The self-management program compared with usual care will improve*  
1089 *physical function, physical activity (levels and self-efficacy), muscle strength and function,*  
1090 *health-related quality of life (HRQoL), sleep and symptoms in patients with operable lung*  
1091 *cancer at 3, 6 and 12 months after surgery.*

- 1093 • \*To assess the effect of a self-management program (exercise and education) on health  
1094 care resource usage and financial burden for patients with operable lung cancer at 12  
1095 months after surgery compared with usual care (control).

1096 *Hypothesis 3: The self-management program compared with usual care will reduce health*  
1097 *care resource usage (including hospitalisations, length of stay and intensive care*  
1098 *admissions) in the first 12 months after surgery and reduce financial burden for patients.*

- 1100 • \*To explore the cost effectiveness of a self-management program (exercise and  
1101 education) for patients with operable lung cancer compared with usual care (control).  
1102 *Hypothesis 4: The self-management program will be cost-effective compared to current*  
1103 *standard treatment in patients with operable lung cancer at 12 months after surgery.*

1104 *\*Note: Analyses for these objectives (hypotheses 3 and 4) will not be described in this SAP but*  
1105 *will be documented in a separate analysis plan to be undertaken in the future*

### 1106 2.2 Outcome measures

1107 The primary outcome measure is the physical function domain score of the European  
1108 Organization for the Research and Treatment of Cancer questionnaire (EORTC QLQ C30 version 3)  
1109 at 3 months post-operatively.

1110 The secondary outcome measures are listed below. Derivation of the measures, where applicable,  
1111 will be provided in Section 3.5. Information on demographic and baseline variables can be found  
1112 in Section 0.

- 1113 • Physical function:
  - 1114 - Physical function domain score of the EORTC QLQ-c30 at 6 and 12 months after  
1115 surgery.
  - 1116 - Short Physical Performance Battery (SPPB) overall and individual (gait, balance, and  
1117 chair) scores at 3 and 6 months post-operatively
- 1118 • Health-related quality of life and symptoms:
  - 1119 - EORTC QLQ-C30 domain and single item scores at 3, 6 and 12 months post-  
1120 operatively

- 1121 - EORTC QLQ-LC13 domain and single item scores at 3, 6 and 12 months post-
- 1122 operatively
- 1123 • Functional exercise capacity:
- 1124 - 6-minute walk distance at 3 and 6 months post-operatively
- 1125 • Muscle strength:
- 1126 - Quadriceps strength test at 3 and 6 months post-operatively
- 1127 - Hand grip strength test at 3 and 6 months post-operatively
- 1128 • Physical activity levels at 3 and 6 months post-operatively:
- 1129 - International Physical Activity Questionnaire short form (IPAQ-SF)
- 1130 ○ Total MET (minutes/week)
- 1131 ○ Categorical Score of IPAQ physical activity (high, moderate or low)
- 1132 - Sedentary activity at 3 and 6 months post-operatively
- 1133 ○ Television and video viewing time
- 1134 • Self-efficacy for physical activity:
- 1135 - Barriers, task and walking self-efficacy scales at 3 and 6 months post-operatively
- 1136 • Fatigue:
- 1137 - Brief fatigue inventory global score at 3 and 6 months post-operatively
- 1138 • Distress:
- 1139 - Distress thermometer at 3 and 6 months post-operatively
- 1140 • Sleep:
- 1141 - Sleep disturbance-short form 8b PROMIS Item Bank at 3 and 6 months post-
- 1142 operatively
- 1143 • Financial toxicity:
- 1144 - COmprehensive score for financial toxicity (COST) at 3 and 6 months post-operatively
- 1145 • Return to work for participants who had employment or non-paid volunteer work prior to
- 1146 surgery: Employment questionnaire adapted for lung cancer at 3, 6 and 12 months post-
- 1147 operatively
- 1148 - Current employment status
- 1149 - Time to return to work after hospital discharge
- 1150 • Return to usual activities for participants who did not have employment in the 6 months prior
- 1151 to surgery: Employment questionnaire adapted for lung cancer at 3, 6 and 12 months post-
- 1152 operatively
- 1153 - Time to return to usual activities after hospital discharge
- 1154 • Survival status at 12 months

### 1155 2.3 Safety outcomes

1156 Intervention participants will be asked during telehealth consultations to report any adverse  
1157 events. These include:

- 1158 • Serious adverse events are defined as any events which are life-threatening or result in
- 1159 death or hospitalisation (or prolongation of hospitalisation), incapacity or disability.
- 1160 • Minor adverse events include new or progressive pain, non-injurious falls, severe
- 1161 dyspnoea, worsening fatigue, palpitations, neurological deficits and altered cognitive
- 1162 status.

### 1163 2.4 Other outcomes

1164 Data will be collected on the number and reason for hospital re-admissions in 12 months since  
1165 surgery.

1166 **3 STUDY METHODS**

1167 **3.1 Study Design and Plan**

1168 This is a multisite, parallel-group, two-arm, phase II randomised controlled superiority trial with a  
1169 1:1 allocation ratio to either a 12-week programme of home-based exercise and self-management  
1170 plus usual care (Program/intervention) or usual care alone (control). The study schema is shown  
1171 in Figure 1. The protocol will follow the recommendations of Standard Protocol Items:  
1172 Recommendations for Interventional Trials (SPIRIT), Guidelines for Reporting Trial Protocols and  
1173 Completed Trials Modified Due to the COVID-19 Pandemic and Other Extenuating Circumstances  
1174 CONSERVE-SPIRIT extension) and Template for Intervention Description and Replication (TIDieR).  
1175 The total recruitment target is 112 participants.

1176 Participants will be asked to participate in five testing sessions across the 12 month period of the  
1177 study with the first testing session just prior to surgery and subsequent sessions scheduled:  
1178 before hospital discharge, and at 3 months, 6 months and 12 months post surgery. Each testing  
1179 session is anticipated to take a maximum of 90 minutes in total. Assessments will occur in the  
1180 outpatient physiotherapy, thoracic surgery or respiratory medicine departments, however for  
1181 participants unable to travel/drive to attend or those who prefer not to attend the hospital the  
1182 hospital for follow-up appointments, will be offered a home visit assessment if they live within a  
1183 feasible distance of the hospital.

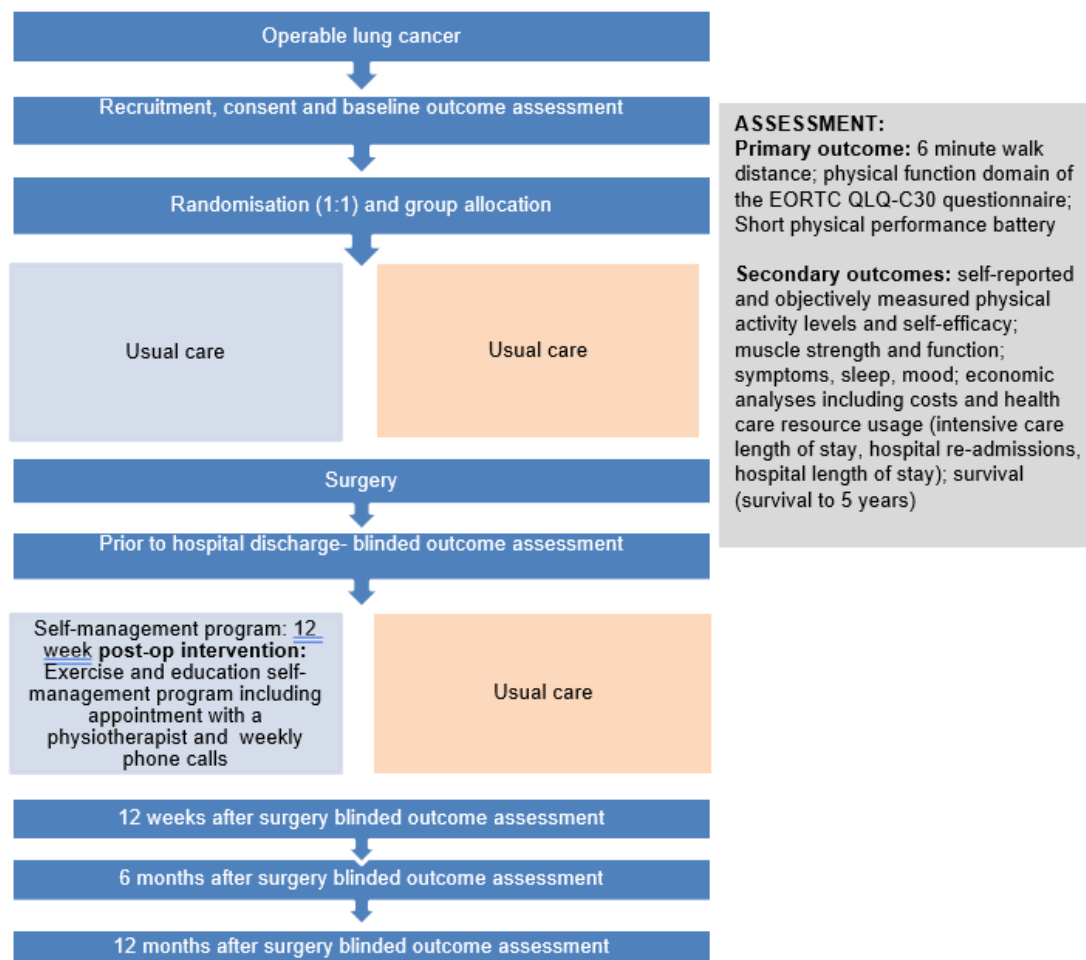

1184  
1185 **Figure 1: CAPACITY Trial schema**

1186  
1187

1188 **3.2 Intervention groups**

1189 The program consists of one to two appointments with a physiotherapist (before hospital  
1190 discharge post-operatively). Additionally, the patient will receive weekly phone calls up to 12  
1191 weeks after surgery to promote adherence to physical activity goals, discuss barriers/issues with  
1192 their exercise and progress their exercise program. The intervention is designed to be equitable  
1193 and inclusive of rural patients, as measurement and intervention appointments are timed with  
1194 surgical consults and the additional intervention is phone-based.

1195 **3.3 Inclusion-Exclusion Criteria**

1196 Eligible participants are adults, aged 18 years or over who meet all the following inclusion criteria:

- 1197 i) Able to provide consent
- 1198 ii) Planned to receive surgical treatment for non-small cell lung cancer
- 1199 iii) Expected to be alive > 6 months
- 1200 iv) Have surgeon or physician approval to participate in the study
- 1201 v) Are not currently meeting the physical activity guidelines (150 minutes of moderate  
1202 intensity physical activity per week)
- 1203 vi) Have an Eastern Cooperative Oncology Group (ECOG) performance status of 0-2 at study  
1204 entry
  - 1205 - ECOG 0: Fully active
  - 1206 - ECOG 1: Walking, but only can do light work
  - 1207 - ECOG 2: Rest in bed LESS than half the day, do not work but can care for self

1208 Participants will be deemed ineligible to participate if they satisfy any of the following exclusion  
1209 criteria:

- 1210 i) Are non-English speaking (insufficient English language skills to complete the  
1211 questionnaires)
- 1212 ii) Have metastatic disease (stage IV lung cancer) at study entry
- 1213 iii) Have acute uncontrolled cardiovascular or respiratory issues
- 1214 iv) Have decompensated heart failure, severe aortic stenosis, uncontrolled arrhythmia, or  
1215 acute coronary syndrome
- 1216 v) Are non-ambulant (for example: amputee, spinal cord injury, wheel-chair bound)
- 1217 vi) Have an ECOG performance status of 3 or 4 at study entry
- 1218 vii) Have cognitive impairment (determined as not being able to provide consent for surgery)

1219 **3.4 Randomisation and Blinding**

1220 Eligible participants were randomly allocated in a 1:1 ratio to either the exercise and education  
1221 arm or to the usual care arm. Randomisation was stratified by hospital site (A – Royal Melbourne  
1222 Hospital and B – St Vincent’s Hospital Melbourne). The randomisation schedule was computer  
1223 generated by an independent statistician and allocation was carried out centrally by the lead  
1224 investigator or site trial coordinator using the Research Electronic Data Capture (REDCap)  
1225 randomisation module. Block permuted randomisation with varying block sizes was used.  
1226 Allocation concealment was achieved by only releasing the randomisation code after the  
1227 participant completed the baseline outcome measures and had undergone surgery.

1228 Randomisation occurred day 1 or 2 post surgery to ensure all patients had undergone surgery and  
1229 received confirmation of a diagnosis of non-small cell lung cancer (NSCLC). If the histological  
1230 diagnosis was still unconfirmed at this point, the patient was randomised and retained in the  
1231 trial<sup>1</sup>. The final diagnoses will be reported at the end of the trial. Following randomisation, the  
1232 intervention physiotherapist was contacted by the lead investigator or trial coordinators and  
1233 informed of the group allocation. Blinding of participants and the intervention physiotherapists  
1234 was not possible due to the nature of the exercise intervention. Outcome assessors were blinded  
1235 to group allocation throughout all assessment periods. If an assessor became unblinded, it was  
1236 documented and reported. All usual care staff who provide usual clinical care to patients on the  
1237 ward were blinded to group allocation. Other study investigators (excluding those involved in  
1238 delivering the intervention), including the study statistician, will remain blinded until the database  
1239 has been cleaned, a blinded data review has taken place and the data are ready for analysis.

1240

1241 **3.5 Sample Size**

1242 A sample size of 88 (44 per arm) was required to provide 80% power with a two-sided alpha of  
1243 0.05 to detect a minimum difference of 12.9 in mean EORTC QLQ-C30 physical function score  
1244 (primary outcome) between the two arms at 3-months follow-up (primary time point), assuming a  
1245 standard deviation of 21.3 (from our prior published data). To allow for an anticipated drop-out  
1246 rate of 20% the sample size was increased to 112 participants (an additional 24 participants).

1247 At the time of writing the SAP recruitment was completed with 116 participants randomised.

---

<sup>1</sup> However, if no patients no longer meet the eligibility criteria (Section 0) they will be deemed ineligible and excluded in the analysis population.

1248 **3.6 Study Visit Schedule**

1249 Study variables were collected according to the study visit schedule in Table 1. At the time of writing this SAP, recruitment was complete, and the study was  
 1250 in the follow-up period.

1251 **Table 1: Schedule of enrolment, intervention and assessments**

| Assessment/ Procedure                                                              | Pre-surgery and before randomisation | Post-operatively before hospital discharge | 3 months post-operatively | 6 months post-operatively | 12 months post-operatively |
|------------------------------------------------------------------------------------|--------------------------------------|--------------------------------------------|---------------------------|---------------------------|----------------------------|
| <b>ENROLMENT:</b>                                                                  |                                      |                                            |                           |                           |                            |
| Eligibility screen                                                                 | X                                    |                                            |                           |                           |                            |
| Informed Consent                                                                   | X                                    |                                            |                           |                           |                            |
| Allocation                                                                         |                                      | X*                                         |                           |                           |                            |
| Demographic and medical information, including surgical procedure                  | X                                    | X                                          |                           |                           |                            |
| <b>ASSESSMENTS:</b>                                                                |                                      |                                            |                           |                           |                            |
| EORTC QLQ-c30 and LC13 questionnaire                                               | X                                    |                                            | X**                       | X                         | X                          |
| Physical function test– 6MWD                                                       | X                                    |                                            | X                         | X                         |                            |
| Physical function test –SPPB                                                       | X                                    | X                                          | X                         | X                         |                            |
| Muscle strength and function tests                                                 | X                                    | X                                          | X                         | X                         |                            |
| Physical activity – activity devices, and PA levels questionnaires                 | X                                    |                                            | X                         | X                         |                            |
| Self-efficacy questionnaires                                                       | X                                    | X                                          | X                         | X                         |                            |
| Symptoms, sleep, fatigue, financial burden, return to work and mood questionnaires | X                                    |                                            | X                         | X                         | X (return to work only)    |
| Intervention satisfaction and knowledge questionnaires (intervention group only)   | X                                    |                                            | X                         |                           |                            |
| EQ 5D 5L                                                                           | X                                    |                                            | X                         | X                         | X                          |
| Health care resource usage data over 12 months                                     |                                      |                                            |                           |                           | X                          |
| Pre post surveys (views of program)                                                | X                                    |                                            | X                         |                           |                            |
| Interviews with 15-20 participants                                                 |                                      |                                            |                           | X                         |                            |
| Survival follow-up                                                                 |                                      |                                            |                           |                           | x (and at 5 years)         |

1252 \*1 to 2 days post-op

1253 \*\*Timepoint of the primary endpoint (physical function score)

1254 Time-windows will be applied to all visit data collected at baseline, 3-months, 6-months and 12-  
 1255 months, with assessments outside the predefined visit windows excluded from the analyses. Relative  
 1256 days inclusive of visit date will be derived as the visit date minus the randomisation date. The visit  
 1257 windows in Table 2 will be applied to the relative days.  
 1258

1259 **Table 2: Assessment visit windows**

| Visit                                       | Target day | Lower limit (incl.) | Upper limit (incl.) |
|---------------------------------------------|------------|---------------------|---------------------|
| Day -1 – Screening                          |            | Day -10             | Day -1              |
| Pre-surgery and before randomisation        |            |                     |                     |
| Day 0 – Randomisation date                  |            | Day 0               | Day 0               |
| Post-operatively before hospital discharge* |            |                     |                     |
| Month 3 – 3 months post-operatively         | Day 90     | Day 62              | Day 118             |
| Month 6 – 6 months post-operatively         | Day 180    | Day 152             | Day 208             |
| Month 12 - 12 months post-operatively       | Day 365    | Day 323             | Day 407             |

1260 \*Assessments at this visit are not included in this analysis

### 1261 3.7 Outcome Variables

1262 A detailed description of the efficacy study variables, grouped according to domain, is presented in  
 1263 Sections 0 to 0. For each outcome measure, details on the data type of variable, whether it will be  
 1264 derived and the variable name in the study database is provided in Table 9.

1265 The patient-reported outcomes were obtained from the following questionnaires:

- 1266 - The European Organization for the Research and Treatment of Cancer Quality of Life  
 1267 Questionnaires: core 30-item (EORTC QLQ-c30, version 3) and the Lung Cancer 13-item  
 1268 supplement (EORTC QLQ-LC13)
- 1269 - The International Physical Activity Questionnaire Short Form (IPAQ-SF)
- 1270 - Self-efficacy for physical activity
- 1271 - Brief Fatigue Inventory (BFI)
- 1272 - Distress Thermometer
- 1273 - Sleep Disturbance-Short Form 8b PROMIS Item Bank V1.0
- 1274 - COmprehensive Score for financial Toxicity (COST)

1275 The objective outcomes were obtained from the following questionnaires or tests:

- 1276 - Short Physical Performance Battery (SPPB)
- 1277 - 6-minute walk distance test (6MWD)
- 1278 - Quadriceps strength test
- 1279 - Hand grip strength test

1280 Published scoring manuals, if available, will be used if required to derive the outcomes for each  
 1281 questionnaire used in the study.

1282 In the subsections that follow, some of the outcome variables are to be derived by the statistician  
 1283 performing the analysis. In most cases there is a questionnaire manual detailing how to compute  
 1284 composite scores if items are missing. If a questionnaire manual does not describe how to handle  
 1285 missing data for a questionnaire then the score will be coded as missing.

1286 **3.7.1 Physical function**

1287 Physical function will be measured via two methods: the EORTC QLQ-c30 instrument (primary  
1288 endpoint) and the Short Physical Performance Battery (SPPB).

1289 **EORTC QLQ-c30**

1290 The physical function score from the EORTC QLQ-c30 will be derived from 5 items (Items 1 to 5) which  
1291 are coded with response categories of: 1 - Not at all; 2 - A little; 3 - Quite a bit; and 4 - Very much. The  
1292 responses to the 5 items are averaged to produce a raw score (RS, with range of 1 to 4) and then a  
1293 linear transformation is applied to re-scale and produce a score (S) with a range of 0 to 100. A high  
1294 physical function score indicates better function.

1295 In general, the calculation of a functional scale from the QLQ-c30 is derived as follows:

- 1296 1. Calculate the raw score (RS):  $RS = (I_1 + I_2 + \dots + I_n)/n$   
1297 2. Apply the linear transformation to 0-100 to obtain the score S,  
1298 Functional scales:  $S = \left\{1 - \frac{(RS-1)}{range}\right\} \times 100$

1299 If at least 50% of the subscale items are missing, for the physical function scale this equates to any 3 of  
1300 the 5 questions, then the physical function score will be treated as missing.

1301 **SPPB**

1302 The SPPB will produce 4 outcomes based on the following tests performed by participants:

- 1303 1. Gait speed: participants are instructed to walk a distance of 4 meters and the average of two  
1304 trials are used;  
1305 2. Standing balance: participants are assessed in three different static positions (side-by-side  
1306 stand, semi-tandem stand and tandem stand) for 10 seconds each, and  
1307 3. Chair rise task: participants are instructed to stand up and sit down five times in a row as  
1308 quickly as possible.  
1309 4. Overall SPPB performance score

1310 Each individual test is scored on a scale of zero to four points with higher scores indicating better  
1311 performance. The three test scores are summated to give an overall SPPB performance score ranging  
1312 from zero to 12 points. A zero score indicates poor function whilst 12 indicates excellent function. It  
1313 has been previously reported in the literature that for older adults a score of 10 is considered the cut-  
1314 off for mobility impairment (i.e. scores <10 = poor mobility) and will be used to guide interpretation of  
1315 results (not as an outcome).

1316 If a participant attends the visit but was not physically able to complete a test, a score of 0 is given for  
1317 that test. If a participant did not attend or refuses to do the test, the score is treated as missing.

1318

1319

1320

1321

1322

1323

1324

1325



1326 **3.7.2 Health-related quality of life and symptoms**

1327 Both the EORTC QLQ-c30 and EORTC QLQ-LC13 questionnaires will be used to assess health-related  
 1328 quality of life and symptoms.

1329 **EORTC QLQ-c30**

1330 Health-related quality of life and symptoms outcomes will be derived using scales from the EORTC  
 1331 QLQ-c30. The EORTC QLQ-c30 generates 9 multi-item scales: 5 functional scales (physical, role,  
 1332 emotional, cognitive and social functioning), 3 symptom scales (pain, fatigue and nausea/vomiting)  
 1333 and a global health status/quality of life scale and six single-item scales (appetite loss, dyspnoea,  
 1334 diarrhea, constipation, insomnia and financial impact). The items used to generate each scale are  
 1335 summarised in Table 3. The first 28 items are functional and symptom scales coded with response  
 1336 categories: 1 - Not at all; 2 - A little; 3 - Quite a bit; and 4 - Very much. The last two items measuring  
 1337 global health status/QoL are recorded on a Likert scale: 1 - very poor to 7 - excellent.

1338 **Table 3 The EORTC QLQ C30 version 3.0 scales and items**

|                                                 | Scale | Number of items | Item range* | Version 3.0 Item numbers | Function scales |
|-------------------------------------------------|-------|-----------------|-------------|--------------------------|-----------------|
| <b>Global health status / QoL</b>               |       |                 |             |                          |                 |
| Global health status/QoL (revised) <sup>†</sup> | QL2   | 2               | 6           | 29, 30                   |                 |
| <b>Functional scales</b>                        |       |                 |             |                          |                 |
| Physical functioning (revised) <sup>†</sup>     | PF2   | 5               | 3           | 1 to 5                   | F               |
| Role functioning (revised) <sup>†</sup>         | RF2   | 2               | 3           | 6, 7                     | F               |
| Emotional functioning                           | EF    | 4               | 3           | 21 to 24                 | F               |
| Cognitive functioning                           | CF    | 2               | 3           | 20, 25                   | F               |
| Social functioning                              | SF    | 2               | 3           | 26, 27                   | F               |
| <b>Symptom scales / items</b>                   |       |                 |             |                          |                 |
| Fatigue                                         | FA    | 3               | 3           | 10, 12, 18               |                 |
| Nausea and vomiting                             | NV    | 2               | 3           | 14, 15                   |                 |
| Pain                                            | PA    | 2               | 3           | 9, 19                    |                 |
| Dyspnoea                                        | DY    | 1               | 3           | 8                        |                 |
| Insomnia                                        | SL    | 1               | 3           | 11                       |                 |
| Appetite loss                                   | AP    | 1               | 3           | 13                       |                 |
| Constipation                                    | CO    | 1               | 3           | 16                       |                 |
| Diarrhoea                                       | DI    | 1               | 3           | 17                       |                 |
| Financial difficulties                          | FI    | 1               | 3           | 28                       |                 |

\* *Item range* is the difference between the possible maximum and the minimum response to individual items; most items take values from 1 to 4, giving *range* = 3.

<sup>†</sup> (revised) scales are those that have been changed since version 1.0, and their short names are indicated in this manual by a suffix “2” – for example, PF2.

1339  
 1340 The EORTC QLQ-c30 scales have not been computed within the study database so will be derived  
 1341 according to the EORTC QLQ-c30 scoring manual<sup>2</sup>. All the scales and single-item measures are linearly  
 1342 transformed to a scale of zero to 100. Higher scores on functional domains and global health  
 1343 status/quality of life scale represent higher functioning and higher HRQoL. Lower scores on symptom  
 1344 domains and single items represent less symptoms.

1345

1346

1347

<sup>2</sup> <https://www.eortc.org/app/uploads/sites/2/2018/02/SCmanual.pdf>

1348 Calculation of EORTC QLQ-c30 scales

1349 The principle for scoring these scales is the same in all cases:

- 1350 1. Estimate the average of the items that contribute to the scale; this is the raw score.  
1351 2. Use a linear transformation to standardise the raw score, so that scores range from 0 to 100; a  
1352 higher score represents a higher ("better") level of functioning, or a higher ("worse") level of  
1353 symptoms.

1354 In practical terms, if items  $I_1 + I_2 + \dots + I_n$  are included in a scale, the procedure is as follows:

- 1355 3. Calculate the raw score (RS):  $RS = (I_1 + I_2 + \dots + I_n)/n$   
1356 4. Apply the linear transformation to 0-100 to obtain the score S,

1357 Functional scales:  $S = \left\{1 - \frac{(RS-1)}{range}\right\} \times 100$

1358 Symptom scales / items:  $S = \left\{\frac{(RS-1)}{range}\right\} \times 100$

1359 Global health status / QoL:  $S = \left\{\frac{(RS-1)}{range}\right\} \times 100$

1360 The range is the difference between the maximum possible value of RS and the minimum possible  
1361 value. The QLQ-c30 has been designed so that all items in any scale take the same range of values.  
1362 Therefore, the range of RS equals the range of the item values. Most items are scored 1 to 4, giving  
1363 range = 3. The exceptions are the items contributing to the global health status/QoL, which are 7-point  
1364 questions with a range of 6.

1365 If at least 50% of the subscale items are missing, then the subscale will be treated as missing. Missing  
1366 single items will also be treated as missing. No multiple imputation will be used.

1367 The Stata command "qlqc30<sup>3</sup>" will be used to perform the scoring of the EORTC QLQ-c30. The code for  
1368 this has been checked by the SAP author (DZ) to ensure the correct derivation and handling of missing  
1369 data.

1370 **EORTC QLQ-LC13 lung cancer supplement module**

1371 Health-related quality of life and symptoms outcomes specific to lung cancer will be derived using  
1372 scales from the EORTC QLQ-LC13 module. The QLQ-LC13 includes questions assessing lung cancer-  
1373 associated symptoms (cough, haemoptysis, dyspnoea and site-specific pain) and treatment-related  
1374 side effects (sore mouth, dysphagia, peripheral neuropathy and alopecia). The items used to generate  
1375 each scale are summarised in Table 4.

1376  
1377 The scoring approach for the QLQ-LC13 is identical in principle to that for the symptom scales/single  
1378 items of the QLQ-c30 with missing data handled the same way as described above. The only exception  
1379 to this is when deriving the "Dyspnoea" scale where if item 5 is missing then item 3 and item 4 should  
1380 be used as single-items as not to introduce bias in the measure.

1381  
1382 The Stata command "qlqlc13" will be used to perform the scoring of the EORTC QLQ-LC13. This  
1383 command has been created by the SAP author (DZ) using the "qlqc30" command as template.

1384

1385

1386

1387

---

<sup>3</sup> Bascoul-Mollevi, C., Castan, F., Azria, D., & Gourgou-Bourgade, S. (2015). EORTC QLQ-C30 Descriptive Analysis with the qlqc30 Command. The Stata Journal, 15(4), 1060–1074.

1389 **Table 4 The EORTC QLQ-LC13 scales and items**

| Scale name                    | Scale | Number of items | Item range* | QLQ-LC13 Item numbers | † |
|-------------------------------|-------|-----------------|-------------|-----------------------|---|
| <b>Symptom scales / items</b> |       |                 |             |                       |   |
| Dyspnoea†                     | LCDY  | 3†              | 3           | 3,4,5                 | X |
| Coughing                      | LCCO  | 1               | 3           | 1                     |   |
| Haemoptysis                   | LCHA  | 1               | 3           | 2                     |   |
| Sore mouth                    | LCSM  | 1               | 3           | 6                     |   |
| Dysphagia                     | LCDS  | 1               | 3           | 7                     |   |
| Peripheral neuropathy         | LCPN  | 1               | 3           | 8                     |   |
| Alopecia                      | LCHR  | 1               | 3           | 9                     |   |
| Pain in chest                 | LCPC  | 1               | 3           | 10                    |   |
| Pain in arm or shoulder       | LCPA  | 1               | 3           | 11                    |   |
| Pain in other parts           | LCPO  | 1               | 3           | 12                    |   |

\* "Item range" is the difference between the possible maximum and the minimum response to individual items.

† The dyspnoea scale should only be used if all three items have been answered. Some respondents ignore question 5 because they never climb stairs; in this case, the score for the dyspnoea scale would be biased if it were based upon the other two items. Hence if item 5 is missing then items 3 and 4 should be used as single-item measures.

1390

1391 **3.7.3 Functional exercise capacity**

1392 Functional exercise capacity will be measured using the 6-minute walk distance (6MWD)

1393 **6-minute walk distance functional exercise capacity**

1394 The 6-minute walk distance (6MWD) is a field walking test performed according to the American  
 1395 Thoracic Society guidelines<sup>4</sup>. Participants are asked to walk up and down a 30m flat straight corridor  
 1396 and cover as much ground as possible in six minutes. The American Thoracic Society guideline  
 1397 recommends using the best of two repeated 6MWD. The resulting outcome is a distance with a range  
 1398 from 0 meters to 800 meters. If the participant has only one attempt then this will be the outcome  
 1399 measure. If a participant attends the visit but was not able to complete or attempt a test then a score  
 1400 of 0 is given for that test. If a participant declined the test or did not attend the visit then each score is  
 1401 treated as missing.

1402 **3.7.4 Muscle strength**

1403 Muscle strength will be measured using four outcomes derived from two tests: quadriceps strength  
 1404 test (left and right) and the hand grip strength test (left and right).

1405 **Quadriceps strength test**

1406 Quadriceps muscle strength is measured by two quantities:

- 1407 i) highest peak force (kilograms) and  
 1408 ii) longest time (seconds) to peak force over 6s.

1409 The test is repeated three times for each participant on each leg after a practice bilaterally. The  
 1410 highest peak force (kilograms) and longest time to peak force over 6s out of the 6 trials conducted on  
 1411 each leg (3x left quadricep, 3x right quadricep) will be analysed. If only one leg has been tested, this  
 1412 result will still be used. If a test is only performed once, then the single measure obtained will be used  
 1413 in the analysis.

1414 **Hand grip strength test**

<sup>4</sup> American Thoracic Society, ATS statement: guidelines for the six-minute walk test. American Journal of Respiratory and Critical Care Medicine, 2002. 166: p. 111-117.

1415 Hand grip strength test is measured by two quantities:

- 1416 i) highest peak force (kilograms) and
- 1417 ii) longest time (seconds) to peak force over 6s.

1418 The test is repeated three times for each participant on each hand after a practice bilaterally. The  
1419 highest peak force (kilograms) and longest time to peak force over 6s out of the 6 trials conducted on  
1420 each hand (3x left hand, 3x right hand) will be analysed. If only one hand has been tested, this result  
1421 will still be used.

1422 If a participant attends the visit but did not complete or attempt a test then a score of 0 is given for  
1423 that test. If a participant did not attend the visit then each score is treated as missing.

### 1424 *3.7.5 Physical activity levels*

#### 1425 **International Physical Activity Questionnaire- Short Form**

1426 Physical activity will be measured using two outcomes derived from the International Physical Activity  
1427 Questionnaire Short Form (IPAQ-SF), a 7-item questionnaire asking participants to recall their physical  
1428 activity from the past seven days. The first 6 items (number of minutes and days spent on walking,  
1429 moderate and vigorous activity) are used to calculate the first outcome of total physical activity  
1430 Metabolic Equivalent Tasks (MET)-minutes/week. This is derived by adding up the calculated MET-  
1431 minutes within each physical activity intensity level: vigorous intensity, moderate intensity, and  
1432 walking.

#### 1433 Calculation of Total physical activity MET-minutes/week

1434 The calculation of the score\* is:

- 1435 1. Walking MET-minutes/week = 3.3 x walking minutes x walking days
- 1436 2. Moderate MET-minutes/week = 4.0 x moderate-intensity activity minutes x moderate days
- 1437 3. Vigorous MET-minutes/week = 8.0 x vigorous-intensity activity minutes x vigorous-intensity days
- 1438 4. Total physical activity MET-minutes/week = sum of Walking (i)+ Moderate (ii) + Vigorous MET-  
1439 minutes/week scores (iii)

1440  
1441 \* As per the IPAQ-SF guidelines<sup>5</sup>, all walking, moderate and vigorous activity time variables exceeding  
1442 180 minutes will be truncated (that is re-coded) to be equal to 180 minutes. This rule permits a  
1443 maximum of 21 hours of activity in a week to be reported for each category (3 hours \* 7 days).  
1444 However, if the sum of all walking, moderate and vigorous time variables exceeds 960 minutes (16  
1445 hours) then this should be excluded from the analysis<sup>6</sup>. Also, only values of 10 or more minutes of  
1446 activity should be included in the calculation of the IPAQ-SF MET-minutes/week scores.

#### 1448 Calculation of categorised physical activity

1449 The second outcome is a categorisation of the MET-minutes/week scores into three groups according  
1450 to their physical activity levels:

- 1451 i. "High" physical activity level - meeting any one of the following criteria: vigorous-intensity  
1452 activity on  $\geq 3$  days and accumulating  $\geq 1500$  MET-min/week, or  $\geq 7$  days of any activity  
1453 accumulating  $\geq 3000$  MET-min/week);
- 1454 ii. "Moderate" physical activity level - meeting any one of the following criteria:  $\geq 3$  days of  
1455 vigorous activity of  $\geq 20$  min/day; or  $\geq 5$  days of moderate-intensity activity and/or walking  $\geq 30$   
1456 min; or  $\geq 5$  days of activity accumulating  $\geq 600$  MET-min/ week);
- 1457 iii. "Low" physical activity level - no physical activity reported or some activity reported but not  
1458 satisfying neither high or moderate criteria.

1459 If data are missing in walking, moderate or vigorous days or minutes or a response of "Don't know/Not  
1460 sure" then the data is set as missing.

---

<sup>5</sup> [https://www.physio-pedia.com/images/c/c7/Quidelines\\_for\\_interpreting\\_the\\_IPAQ.pdf](https://www.physio-pedia.com/images/c/c7/Quidelines_for_interpreting_the_IPAQ.pdf)

<sup>6</sup> Assumes than on average an individual sleeps 8 hours per day

1461 **Sedentary behaviour**

1462 Sedentary behaviour will be assessed via the question “On average over the last week, how many  
1463 hours per day did you watch television or videos?”. The outcome is a self-reported average number of  
1464 hours per day with no derivation required.

1465 ***3.7.6 Self-efficacy for physical activity***

1466 Self-efficacy for physical activity will be measured by three outcomes based on a questionnaire  
1467 concerning barriers, task and walking self-efficacy where participants had to indicate how confident  
1468 they felt carrying out exercise in certain situations. This included a 9-item barrier self-efficacy scale, a  
1469 4-item task self-efficacy scale, and a 6-item walking self-efficacy scale. Items were rated on a scale  
1470 from 0% “Not at all confident” to 100% “Extremely confident” in 10% increments.

1471 **Calculation of self-efficacy scores**

1472 Overall scores for each scale (barriers, task and walking) need to be derived by averaging the scores  
1473 from the items within each scale<sup>7</sup>:

1474 1. The **barrier self-efficacy overall score**

- 1475 • Six or more items out of the 9-item barrier self-efficacy scales must be completed to  
1476 calculate this score. The arithmetic mean is taken across the completed items to give a range  
1477 of scores from 0% to 100%.
- 1478 • If more than 3 items are missing, then the barrier score is treated as missing.

1479 2. The **task self-efficacy overall score**

- 1480 • Three or more items out of the 4-item task self-efficacy scales must be completed to  
1481 calculate this score. The arithmetic mean is taken across the completed items to give a range  
1482 of scores from 0% to 100%.
- 1483 • If more than 1 item is missing, then the task score is treated as missing.

1484 3. The **walking self-efficacy overall score**

- 1485 • Four or more items out of the 6-item walking self-efficacy scales must be completed to  
1486 calculate this score. The arithmetic mean is taken across the completed items to give a range  
1487 of scores from 0% to 100%.
- 1488 • If more than 2 items are missing, then the walking score is treated as missing.

1489 ***3.7.7 Fatigue***

1490 Fatigue will be measured using the Brief Fatigue Inventory (BFI) to derive the outcome global BFI  
1491 score. The BFI contains 9 items assessing the severity of fatigue and the impact of fatigue on daily  
1492 function in patients with cancer and asks about fatigue over the past 24 hours.

1493 To calculate the global BFI score at least five of the nine BFI items must be completed to calculate this  
1494 score. The arithmetic mean is calculated across the completed items to give a range of scores from 0  
1495 to 10. If more than 4 items are missing, then the global BFI score is treated as missing.

1496 ***3.7.8 Distress***

1497 The Distress Thermometer will be used to measure distress. It is a visual analogue scale with scores  
1498 from 0 (“no distress”) to 10 (“extreme distress”) with a midpoint anchor of 5 labelled as “moderate  
1499 distress” (11). No derivation will be required for this score as it is a single item.

---

<sup>7</sup> Due to a scoring manual being unavailable for this questionnaire, the approach to deal with missing data is based on the paper by Ritter and Loring (Journal of clinical epidemiology 2014: 67:1265-1273) which used a self-efficacy questionnaire for physical activity that had scales based on 4 and 6 items and in their methods they stated how many non-missing responses were required to complete the scale. This was extrapolated for the 9-item scale.

1500 **3.7.9 Sleep**

1501 Sleep disturbance will be measured using the sleep disturbance-short form 8b PROMIS item bank 8-  
 1502 item Sleep Disturbance – Short Form 8b (12). Each item is rated on a 5-point scale (1=never; 2=rarely;  
 1503 3=sometimes; 4=often; and 5=always). The resulting sleep score, a T-score, will be derived as per the  
 1504 scoring manual<sup>8</sup> as described below:

1505 Calculation of T-score

- 1506 1. Due to the coding format in the CAPACITY REDCap database, the following items need to be  
 1507 reversed so that the correct summation can occur: Items 2,3,7 and 8 will be recoded by subtracting  
 1508 the response from 6 so that 1 becomes 5, 2 becomes 4, 3 stays as 3, 4 becomes 2 and 5 becomes 1.
- 1509 2. If *all 8 items have a response*, the total raw score is calculated by summing the 8 responses resulting  
 1510 in a score ranging from 8 to 40 with higher scores indicating greater severity of sleep disturbance.
- 1511 3. If *at least 4 items have a response*, the total raw score is calculated by summing the response scores  
 1512 from the items that were answered. Multiply this sum by the total number of items in the short form  
 1513 then divide by the number of items that were answered. If the result is a fraction, round up to the  
 1514 nearest whole number. This is a \ed total raw score. For pro-rated scores, this calculation assumes  
 1515 that responses are missing at random.
- 1516 4. If *at least 4 items do not have a response* then a total raw score cannot be computed and is treated  
 1517 as missing.
- 1518 5. The total raw score is then converted to a T-score using Table 5. The T-score rescales the raw score  
 1519 into a standardized score with a mean of 50 and a standard deviation (SD) of 10. Therefore a person  
 1520 with a T-score of 40 is one SD below the mean.

1521 **Table 5: PROMIS 8b short form conversion table**

| Sleep Disturbance 8b<br>Short Form Conversion Table |         |     | Sleep Disturbance 8b<br>Short Form Conversion Table |         |     |
|-----------------------------------------------------|---------|-----|-----------------------------------------------------|---------|-----|
| Raw Score                                           | T-score | SE* | Raw Score                                           | T-score | SE* |
| 8                                                   | 28.9    | 4.8 | 24                                                  | 54.3    | 2.5 |
| 9                                                   | 33.1    | 3.7 | 25                                                  | 55.3    | 2.5 |
| 10                                                  | 35.9    | 3.3 | 26                                                  | 56.3    | 2.5 |
| 11                                                  | 38.0    | 3.0 | 27                                                  | 57.3    | 2.5 |
| 12                                                  | 39.8    | 2.9 | 28                                                  | 58.3    | 2.5 |
| 13                                                  | 41.4    | 2.8 | 29                                                  | 59.4    | 2.5 |
| 14                                                  | 42.9    | 2.7 | 30                                                  | 60.4    | 2.5 |
| 15                                                  | 44.2    | 2.7 | 31                                                  | 61.5    | 2.5 |
| 16                                                  | 45.5    | 2.6 | 32                                                  | 62.6    | 2.5 |
| 17                                                  | 46.7    | 2.6 | 33                                                  | 63.7    | 2.6 |
| 18                                                  | 47.9    | 2.6 | 34                                                  | 64.9    | 2.6 |
| 19                                                  | 49.0    | 2.6 | 35                                                  | 66.1    | 2.7 |
| 20                                                  | 50.1    | 2.5 | 36                                                  | 67.5    | 2.8 |
| 21                                                  | 51.2    | 2.5 | 37                                                  | 69.0    | 3.0 |
| 22                                                  | 52.2    | 2.5 | 38                                                  | 70.8    | 3.2 |
| 23                                                  | 53.3    | 2.5 | 39                                                  | 73.0    | 3.5 |
|                                                     |         |     | 40                                                  | 76.5    | 4.4 |

\*SE = Standard Error on T-score metric

1529 **3.7.10 Financial toxicity**

1530 Financial toxicity will be measured using the COmprehensive Score for financial Toxicity (COST)  
 1531 questionnaire to derive the single outcome financial toxicity score based on 11 items.

1532 Calculation of the financial toxicity score

- 1533 1. Negatively stated-items 2,3,4,5,8,9 and 10 will be recoded by subtracting the response from 4  
 1534 so that 0 becomes 4, 1 becomes 3, 2 stays as 2, 3 becomes 1 and 4 becomes 0.
- 1535 2. If *all 11 items have a response* then the total raw score can be calculated by summing the 11  
 1536 responses to obtain a score ranging from 0 to 44 with higher scores indicating better financial  
 1537 well-being.
- 1538 3. If *at least 6 items have a response*, the total raw score is calculated by summing the response  
 1539 scores from the items that were answered. Multiply this sum by the total number of items in

<sup>8</sup> [https://staging.healthmeasures.net/images/PROMIS/manuals/PROMIS\\_Sleep\\_Disturbance\\_Scoring\\_Manual.pdf](https://staging.healthmeasures.net/images/PROMIS/manuals/PROMIS_Sleep_Disturbance_Scoring_Manual.pdf)

1540 the short form then divide by the number of items that were answered. This is a pro-rated  
1541 total raw score. For pro-rated scores, this calculation assumes that responses are missing at  
1542 random.  
1543 4. If *at least 5 items do not have a response* then a total raw score cannot be computed and is  
1544 treated as missing.

### 1546 **3.7.11 Return to work/Return to usual activities**

1547 This objective will be reported differently depending on the participants employment status. Selected  
1548 questions from the Employment questionnaire adapted for this trial specific to the lung cancer surgery  
1549 context<sup>9</sup>.

1550 For participants who were working (including non-paid volunteer work) prior to their surgery, the  
1551 following two questions will be used to calculate the number of weeks they record at follow-up to first  
1552 return to work:

- 1553 i) Have you worked at all since you left the hospital? (question 7)
- 1554 ii) How many weeks after hospital discharge did you return to work? (question 8)

1555 For participants who were not working 6 months prior to their surgery, the following question will be  
1556 used to calculate the number of weeks they record at follow-up to first resume usual activity:

- 1557 i) If you were not working in the 6 months before you were in the hospital, how many weeks  
1558 after hospital discharge did you return to the most important activity you did before being  
1559 admitted to the hospital (e.g., gardening or attending religious service)? (question 5)

### 1560 **3.7.12 Survival**

1561 Survival status will be determined for all participants at 12 months post-surgery.

### 1562 **3.7.13 Hospital re-admissions**

1563 Data will be collected on the number of hospital re-admissions in 12 months since surgery. No  
1564 derivation is required.

### 1565 **3.7.14 Outcomes not being covered in the main study analysis**

1566 There are secondary outcomes pertaining to muscle strength and physical activity levels that were  
1567 included in the study protocol that will not be considered in the main analysis of the CAPACITY study.  
1568 However, it is possible that an analysis of them may be undertaken in the future at the discretion of  
1569 the CAPACITY study investigators.

1570 The measures that will not be analysed and presented are:

- 1571 i) Quadriceps muscle mass and quality (Muscle strength)
- 1572 ii) Respironics ActiCal Z Watch accelerometer measures (Physical activity levels)
- 1573 iii) Rating against PA guidelines for people with cancer (Physical activity levels)
- 1574 iv) Physical Activity Scale for the Elderly (Physical activity levels)

## 1575 **4 GENERAL CONSIDERATIONS**

### 1576 **4.1 Timing of Final Analysis**

1577 Blinded study data entered and stored in the REDCap study database hosted by the University of  
1578 Melbourne will be transferred to the trial biostatistician located at the Centre for Epidemiology and  
1579 Biostatistics at the University of Melbourne, Melbourne, Australia. After the last participant has  
1580 concluded the 12-month study participation, all study data are available and have been cleaned, a  
1581 blinded review meeting will be held with the CAPACITY study team and study biostatisticians (Karen

---

<sup>9</sup> The questionnaire was created by Dale M. Needham, MD, PhD and the Johns Hopkins University Outcomes After Critical Illness & Surgery (OACIS) Group, is licensed under the Creative Commons Attribution-NonCommercial-ShareAlike 4.0 International License. It has been approved for adaption and use in the trial.

1582 Lamb, Diana Zannino) prior to database lock (i.e., it is locked so that data cannot be subsequently  
1583 amended). During this masked data review meeting, the following topics will be discussed and decided  
1584 upon without knowledge of the underlying treatment code:

- 1585 1. Participants who have withdrawn consent, in relation to the use of the participant’s data (or  
1586 part of it) in any of the analyses (Section 0).
- 1587 2. Participant’s inclusion or exclusion status with regards to the “as randomised” and “as  
1588 treated” treatment group (e.g., in the case of misallocation). The exact process for assigning  
1589 the statuses will be defined and documented in the minutes of the meeting prior to breaking  
1590 the mask along with the reason for classifying dyad to “as randomised” and “as treated”.
- 1591 3. Participant’s overall adherence to study intervention as defined in Section 0, in relation to the  
1592 use of the participant’s data (or part of it) in the per protocol population (Section 0) and the  
1593 safety population (Section 0). Overall adherence will be listed and tabulated for the purpose of  
1594 the blinded data review meeting.
- 1595 4. Participants with (minor or major) protocol violations as defined in Section 0, in relation to the  
1596 use of the participant’s data (or part of it) in the per protocol population (Section 0).  
1597 Participants with (minor/major) protocol violations will be listed and tabulated for the purpose  
1598 of the blinded data review meeting.
- 1599 5. Participant’s inclusion or exclusion status with regards to each analysis population (Section 0)  
1600 guided by items 1-4 listed previously. The exact process for assigning the statuses will be  
1601 defined and documented in the minutes of the meeting prior to breaking the blind along with  
1602 any predefined reasons for removing a participant (or part of its data) from a particular  
1603 population.

1604 After database lock, the random code will be obtained from the independent statistician who  
1605 generated the randomisation code and added to the study database by the trial statistician. No  
1606 database may be locked, random code unmasked, or analyses completed until the SAP has been  
1607 approved. The planned analyses in this SAP will be conducted after unmasking of the database and  
1608 any changes to this SAP after unmasking will be documented in an amendment of this SAP and  
1609 considered as post-hoc analyses.

1610 *The expected timing for data review and database lock is August 2023 and the analyses described in*  
1611 *this SAP are expected to be performed by December 2023.*

1612

## 1613 4.2 Analysis Populations

1614 The following analysis populations are planned. The status of each participant with regards to the  
1615 populations and “as randomised”/ “as treated” treatment group will be finalised during the blinded  
1616 data review meeting.

### 1617 4.2.1 Full Analysis/Randomised Population

1618 This will consist of all participants who were randomised, excluding participants who have withdrawn  
1619 from the study, including use of all existing data collected to withdrawal date, as documented in the  
1620 minutes of the blinded data review meeting. Participants will be reported and analysed according to  
1621 their randomised study arm (“as randomised”). This population will be used in the analysis of the  
1622 effectiveness study variables. This will be the intention-to-treat population.



1623 **4.2.2 Per Protocol Population**

1624 This will consist of all participants who were randomised and had confirmed histological diagnosis of  
1625 lung cancer. This population will be used as the secondary analysis set for the efficacy analyses on  
1626 primary and secondary endpoints as described in Section 3.7. This population will also be used for the  
1627 exploratory effectiveness analysis, where a complier average causal effect analysis will be undertaken  
1628 to determine the effect among those that receive the intervention according to the protocol,  
1629 considering adherence to the intervention as defined in Section 0.

1630 **4.2.3 Safety Population**

1631 This will consist of all participants in the intervention arm who completed at least one exercise  
1632 session.

1633 **4.3 Covariates and Subgroups**

1634 **4.3.1 Covariates**

1635 The models used for all study variables will be adjusted for the stratification variable, participating  
1636 study site (i.e., Royal Melbourne Hospital and St Vincent's Hospital).

1637 **4.3.2 Subgroups**

1638 An exploratory subgroup analysis based on postoperative cancer treatment will be performed for the  
1639 primary outcome at 3-months post-randomisation using the full analysis population. The subgroup  
1640 analysis listed below will be performed irrespective of whether the primary objective of the study  
1641 based on EORTC-QLQ physical function at 3 months post-randomisation was achieved or not. The  
1642 subgroups are:

- 1643 • Postoperative cancer treatment: postoperative treatment/postoperative chemotherapy,  
1644 radiotherapy or chemoradiotherapy
- 1645 • No postoperative cancer treatment: postoperative treatment/postoperative chemotherapy,  
1646 radiotherapy or chemoradiotherapy

1647 **4.4 Missing Data**

1648 To describe the missing data, the frequency and percentage of participants with a missing value at  
1649 baseline, 3 months post-randomisation, 6 months post-randomisation and 12 months post-  
1650 randomisation will be summarised for each of the study variables in Section 0 overall and by  
1651 treatment arm (program, usual care) for the full analysis population. Where available, reasons for the  
1652 missingness will be tabulated. In addition, baseline and demographic characteristics (Section 0) will be  
1653 summarised overall and for those with and without a missing value at baseline, 3 months post-, 6  
1654 months post-randomisation and 12 months post-randomisation separately to examine if any  
1655 characteristics appear to be associated with the presence or absence of data.

1656 As the primary strategy to handle missing data, the analysis of continuous study variables will use a  
1657 likelihood-based approach (i.e., constrained longitudinal data analysis, see Section 0). This approach  
1658 assumes that the probability of missing data on the study variable is not related to the missing data  
1659 but to some of the observed measured data in the model. That is, it assumes that the data are Missing  
1660 at Random (MAR).

1661 **4.5 Interim Analyses and Data Monitoring**

1662 There were no interim analyses planned nor has an unplanned interim analysis occurred for this study.  
1663 There was no formal Data and Safety Review Committee however, data quality reviews were  
1664 performed by the principal and senior investigators.  
1665

1666 **4.6 Multi-centre Studies**

1667 This was a multi-centre study recruiting from 2 sites. The randomisation schedule was stratified by  
1668 site. The primary and secondary study variables will be analysed for all sites combined with  
1669 adjustment for site in the models. Due to a small recruitment number at one of the sites<sup>10</sup> an  
1670 exploratory subgroup analyses will not be performed.

1671 **4.7 Multiple Testing**

1672 The comparison of the primary outcome (physical function) between self-management program  
1673 (exercise and education) compared to usual care at 3 months will be performed at the 5% significance  
1674 level. All secondary outcomes are exploratory and were not powered for. Therefore, no adjustment  
1675 for multiple secondary outcomes will be adopted. Instead, all effect sizes and corresponding 95%  
1676 confidence intervals (CIs) will be reported to let readers use their own judgement about the relative  
1677 weight of the conclusions on the effect of the interventions on the secondary outcomes. This  
1678 approach aligns with the usage of p-values favoured by the American Statistical Association. This  
1679 approach will also be used for exploratory subgroup analyses.

1680 **4.8 Estimand Framework**

1681 The analysis of the study outcomes will follow the estimand framework (ICH E9(R1)) which involves  
1682 specifying the following attributes of the estimand<sup>11</sup>:

- 1683 i) Population of interest
- 1684 ii) Variable (or endpoint) of interest
- 1685 iii) Treatment description
- 1686 iv) Handling of intercurrent event(s)<sup>12</sup>
- 1687 v) Population level summary for the variable

1688  
1689 There is only one intercurrent event within this trial which is death due to any cause. To deal with this  
1690 intercurrent event the While-alive/while on treatment strategy will be adopted for all the estimands  
1691 for the primary and secondary outcomes as outlined in Section 0. This involves using measurements  
1692 up until the time of the intercurrent event which censors measurements after the intercurrent event.  
1693

---

<sup>10</sup> St Vincent's hospital recruited 12 participants, compared to Royal Melbourne hospital with 107 participants.

<sup>11</sup> An estimand is a precise description of the treatment effect which reflects the clinical question posed by a clinical trial objective.

<sup>12</sup> An intercurrent event is one that occurs after randomisation and prior to observation of the trial endpoints that affect either the interpretation or the existence of the measurements associated with the clinical question of interest.

1694 **5 SUMMARY OF STUDY DATA**

1695 Participant data will be analysed and presented according to their randomised treatment allocation.  
1696 Outcomes will be summarised using frequencies and percentages (based on the non-missing sample  
1697 size) for categorical/binary variables, mean and standard deviation for continuous variables, or median  
1698 and quartiles (25th and 75th percentile) for non-symmetrical continuous variables as assessed through  
1699 graphical displays (histograms and/or boxplots).

1700 Please refer to Appendices A and B for a listing tables and figures and corresponding templates for the  
1701 reporting of study data. Appendix C provides data mapping to the study database (i.e., the name of  
1702 the variables to be used).

1703 **5.1 Subject Disposition**

1704 The flow of participants will be presented in a Consolidated Standards of Reporting Trials (CONSORT)  
1705 diagram (Figure 1) and a summary of subject disposition during the study period (up to 12 months  
1706 post-surgery) (Table 1.1) as presented in Appendix C.

1707 The following will be included:

- 1708 • Number of participants assessed for eligibility
- 1709 • Number of participants not meeting the inclusion criteria and declined to participate
- 1710 • Number of participants allocated to intervention group or usual care
- 1711 • Number of participants completing visits at 3 months, 6 months and 12 months and number of  
1712 participants who withdrew from the study and lost to follow-up
- 1713 • Number of participants dropped out and for what reasons (death, toxicity, treatment failure,  
1714 withdrew consent)
- 1715 • Number of participants available for analysis for each of the primary, secondary and safety  
1716 outcomes.  
1717

1718 **5.2 Derived variables**

1719 Any primary or secondary outcome variables requiring derivation are described in Section 0 and are  
1720 indicated in the data mapping plan in Appendix C.

1721 **5.3 Protocol deviations and violations**

1722 Protocol deviations and violations will not be provided as the study protocol did not specify what  
1723 constituted a protocol deviation or violation.

1724 **5.4 Baseline Demographic Variables**

1725 The summary statistics will be produced for the following demographic and baseline variables in  
1726 accordance with Section 0.

1727 **Baseline demographics**

- 1728 • Age (in years) at surgery
- 1729 • Sex (Female/Male)
- 1730 • CAPACITY study site (Royal Melbourne Hospital/St Vincent's Hospital Melbourne)
- 1731 • ECOG performance status
- 1732 • Cancer histological type
- 1733 • Cancer stage
- 1734 • Previous cancer diagnosis (including lung)
- 1735 • Comorbidities (diabetes, tobacco consumption, renal insufficiency, respiratory (COPD),  
1736 cardiovascular (PVD), neoplastic, alcoholism → Colinet comorbidity Score)
- 1737 • Race/ethnicity
- 1738 • Body mass index

- 1739 • Smoking history
- 1740 • Respiratory function (FEV1, FEV1/FVC, DLCO actual, DLCO percent predicted)
- 1741 • Highest Education
- 1742 • Occupational status
- 1743 • Living arrangement (pre-admission)

1744

1745 **Surgical and hospital details**

- 1746 • Type of surgery
- 1747 • Hospital length of stay
- 1748 • Any postoperative treatment
- 1749 • ICU admission, length of stay, intubation
- 1750 • Mobility status (use of gait aid, level of independence, endurance)

1751

1752 **Post-operative therapy**

- 1753 • If chemotherapy or radiotherapy received

1754

1755 **5.5 Treatment Compliance**

1756 During the weekly telehealth consultations, participants in the intervention group will be asked to  
1757 recall their adherence rate to the exercise programme and report their daily step count.

1758 Adherence rate will be reported as the percentage of consultations delivered over the 12 weeks  
1759 (number delivered against target of 12 sessions). Completion rate will be reported as the percentage  
1760 of participants who continue consultations to 12 weeks.

1761

## 1762 6 EFFICACY ANALYSES

1763 In general, continuous primary and secondary outcomes where there was a scheduled baseline visit  
1764 and at least 1 post-surgery time points (3, 6 and/or 12 months) will be analysed using a likelihood-  
1765 based longitudinal data analysis model incorporating all available outcome data as the response. Each  
1766 model will include the study group allocation, time point and a study group by time point interaction  
1767 and recruitment site. The absolute difference in mean change in the outcome score from baseline  
1768 between the two study groups will be estimated at each post-surgery timepoint and reported with  
1769 corresponding 95% confidence intervals (CI).

1770 In addition to the analysis of participants according to their allocated group, the complier average  
1771 causal effect will be estimated in secondary analyses, using collected adherence data. Heterogeneity  
1772 of the intervention effect according to postoperative cancer treatment (no postoperative  
1773 treatment/postoperative chemotherapy, radiotherapy or chemoradiotherapy) for the primary  
1774 outcome will be assessed in exploratory analyses by including interactions between postoperative  
1775 treatment and study group.

1776 Further details on the analysis approach for the other outcomes not covered above are provided in  
1777 section 0.

### 1778 6.1 Primary Efficacy Analysis

1779 The primary outcome (physical function domain total score of the EORTC QLQ C30) will be analysed  
1780 using a likelihood-based longitudinal data analysis model, with response consisting of all scores  
1781 (baseline, 3 months, 6 months and 12 months after surgery). The model will include factors  
1782 representing study group, time point and a study group by time point interaction and recruitment site  
1783 included in the model. The model will be restricted to have a common baseline mean score across the  
1784 study groups (enforced statistically in the statistical model) based on the assumption that there are no  
1785 differences in the mean outcome between groups at baseline due to randomisation, thus assuming  
1786 the randomisation was effective. The constrained longitudinal data analysis model provides valid  
1787 inference if the missing data mechanism for the outcome is at most missing at random.

1788 The absolute difference in mean change in EORTC QLQ c30 physical function domain from baseline  
1789 between groups will be estimated (including corresponding two-sided 95% CI and two-sided *p*-value)  
1790 at 3 months after surgery (primary time point).

### 1791 6.2 Secondary Efficacy Analyses

1792 Secondary continuous outcomes will be analysed using a likelihood-based longitudinal data analysis  
1793 model as per the primary outcome analysis. The model will include factors representing study group,  
1794 time point and a study group by time point interaction and recruitment site included in the model.  
1795 Results will be expressed as mean difference for the groups at 3 months, 6 months and 12 months  
1796 post-randomisation where applicable, including two-sided 95% CI.

1797 The secondary categorical outcome, IPAQ physical activity with High, Moderate, Low responses, will  
1798 be analysed using a likelihood-based longitudinal multinomial logistic regression model with a  
1799 multinomial logit link function. The model will include factors representing study group, time point  
1800 and a study group by time point interaction and recruitment site included in the model. Results will be  
1801 expressed as a Relative Risk Ratio for the relative comparison of the risk of the outcome (with “Low”  
1802 as the reference category) compared between study groups at 3 months and 6 months post-  
1803 randomisation where applicable, including two-sided 95% CI. If the frequencies of the IPAQ physical  
1804 activity categories are low (e.g., less than 10 in a category) then consideration will be made to  
1805 combine categories to form a binary response (e.g., Low/Moderate vs High or Low vs Moderate/High)  
1806 and will be analysed using a likelihood-based longitudinal data analysis model with a logistic link  
1807 function. The model will include factors representing study group, time point and a study group by

1808 time point interaction and recruitment site included in the model. Results will be expressed as an Odds  
 1809 Ratio for the relative comparison of the odds of the outcome compared between study groups at 3  
 1810 months and 6 months post-randomisation where applicable, including two-sided 95% CI.

1811 The Kaplan-Meier method will be used to estimate the survival probability at 12 months post-surgery  
 1812 in each arm. Follow-up time will be measured from the date of operation until the date of death from  
 1813 any cause or date last known alive. Participants who have not died by the study closeout date will be  
 1814 censored. Participants who withdraw or are lost to follow-up before the closeout date will be  
 1815 censored at the date they are last known to be alive. Survival probability at 12 months will be reported  
 1816 for each study arm. A Cox proportional hazard model will be used to estimate the hazard ratio (HR)  
 1817 and corresponding 95% CI for time to death between the arms with the control group as the  
 1818 reference.

1819 To estimate the mean time in weeks to return to work or usual activity, as separate analyses based on  
 1820 the employment status of the participant 6 months prior to their surgery, an accelerated failure time  
 1821 survival model will be used to obtain an estimate of the mean difference between the arms with  
 1822 corresponding 95% CI.

1823 For continuous secondary outcomes measured at more than 2 timepoints, differences between  
 1824 randomised groups over time will be presented graphically with the mean parameter value at each  
 1825 timepoint for each treatment group with corresponding 95% confidence intervals.

1826 *p*-values for the secondary outcomes will not be presented.

### 1827 6.3 Estimand-to-analysis for primary and secondary objectives

1828 The estimands concerning the primary objective and secondary objectives are described in Table 6 and  
 1829 Table 7. The handling of the intercurrent events and missing data will adopt the same strategy as per  
 1830 Table 6 as well as the analysis approach which is further described in Section 0.

1831 **Table 6: Estimand-to-analysis for the primary endpoint**

| <b>Objective:</b> To evaluate the effect of a self-management program on physical function at 3 months post-operative in patients with operable lung cancer compared with usual care                                                                                                                            |                                                                                                                                                                                                                                                                                                                                                                          |
|-----------------------------------------------------------------------------------------------------------------------------------------------------------------------------------------------------------------------------------------------------------------------------------------------------------------|--------------------------------------------------------------------------------------------------------------------------------------------------------------------------------------------------------------------------------------------------------------------------------------------------------------------------------------------------------------------------|
| <b>Estimand:</b> The difference in mean physical function score (as measured with the EORTC-QLQ c30) between a self-management program (based on exercise and education) compared with usual care (control) after 3 months post-surgery or death (whichever occurs first) in patients with operable lung cancer |                                                                                                                                                                                                                                                                                                                                                                          |
| <b>Intervention:</b> 12-week program comprising aerobic and resistance exercises, behavioural change counselling and resources (activity tracker, diary and booklet)                                                                                                                                            |                                                                                                                                                                                                                                                                                                                                                                          |
| ESTIMAND                                                                                                                                                                                                                                                                                                        | ANALYSIS                                                                                                                                                                                                                                                                                                                                                                 |
| <b>Target population</b>                                                                                                                                                                                                                                                                                        | <b>Analysis set</b>                                                                                                                                                                                                                                                                                                                                                      |
| Patients with operable lung cancer                                                                                                                                                                                                                                                                              | Full analysis population (§0)                                                                                                                                                                                                                                                                                                                                            |
| <b>Variable</b>                                                                                                                                                                                                                                                                                                 | <b>Outcome measure</b>                                                                                                                                                                                                                                                                                                                                                   |
| Physical function score as measured with the EORTC-QLQ c30                                                                                                                                                                                                                                                      | Physical function score measured 3 months post-surgery.                                                                                                                                                                                                                                                                                                                  |
| <b>Handling of intercurrent events</b>                                                                                                                                                                                                                                                                          | <b>Handling of missing data</b>                                                                                                                                                                                                                                                                                                                                          |
| <ul style="list-style-type: none"> <li>Deaths: while-alive strategy</li> </ul>                                                                                                                                                                                                                                  | Participants will be excluded if physical function not collected at 3 months.                                                                                                                                                                                                                                                                                            |
| <b>Population-level summary measure</b>                                                                                                                                                                                                                                                                         | <b>Analysis approach</b>                                                                                                                                                                                                                                                                                                                                                 |
| Absolute difference in mean change in physical function score from baseline between groups at 3 months post-surgery.                                                                                                                                                                                            | Constrained longitudinal data analysis including all timepoints (baseline, 3, 6 and 12 months after surgery), with study group, time point and a study group by time point interaction and recruitment site included in the model. A contrast will be used to obtain the mean difference at 3 months and corresponding 95% confidence interval and <i>p</i> -value (§0). |

1832

**Table 7: Estimand-to-analysis for the secondary endpoints**

| Secondary Objective                                                                                                                                                                                                | Treatments                                                                   | Population                    | Variable & Outcome measure/s                                                                                                                                                                                                              | Handling of intercurrent events* | Population-level summary                                                                                                                          | Analysis**                                                                                 |
|--------------------------------------------------------------------------------------------------------------------------------------------------------------------------------------------------------------------|------------------------------------------------------------------------------|-------------------------------|-------------------------------------------------------------------------------------------------------------------------------------------------------------------------------------------------------------------------------------------|----------------------------------|---------------------------------------------------------------------------------------------------------------------------------------------------|--------------------------------------------------------------------------------------------|
| To assess the effect of a self-management program (exercise and education) on <b>physical function</b> in patients with operable lung cancer compared with usual care (control).                                   | Usual care plus self-management program (exercise and education); usual care | Full analysis population (§0) | i. EORTC QLQ-c30 Physical function domain score at 6 and 12 months post- surgery<br>ii. SPPB overall and individual (gait, balance, and chair) scores at 3- and 6-months post-surgery                                                     | While-alive strategy             | Absolute difference in mean change in physical function score from baseline between groups at 3 (for SPPB scores), 6- and 12-months post-surgery. | As per Table 6 with additional contrasts for comparisons at 6- and 12-months post-surgery. |
| To assess the effect of a self-management program (exercise and education) on <b>physical activity (levels and self-efficacy)</b> in patients with operable lung cancer compared with usual care (control).        | Usual care plus self-management program (exercise and education); usual care | Full analysis population (§0) | IPAQ-SF total MET (minutes/week) and categorical (high/moderate/low); and barriers, task and walking self-efficacy scales at 3 and 6 months post-surgery. Sedentary activity based on average television and video viewing hours per day. | While-alive strategy             | Absolute difference in mean total MET from baseline between groups at 3- and 6-months post-surgery.                                               | As per Table 6 with additional contrasts for comparisons at 6 months post-surgery.         |
| To assess the effect of a self-management program (exercise and education) on <b>muscle strength and function</b> in patients with operable lung cancer compared with usual care (control).                        | Usual care plus self-management program (exercise and education); usual care | Full analysis population (§0) | Quadriceps and hand grip strength test measured as a peak force and time to peak force at 3 and 6 months post-surgery                                                                                                                     | While-alive strategy             | Absolute difference in mean change in muscle strength and function from baseline between groups at 3- and 6-months post-surgery.                  | As per Table 6 with additional contrasts for comparisons at 6 months post-surgery.         |
| To assess the effect of a self-management program (exercise and education) on <b>health-related quality of life (HRQoL) and symptoms</b> in patients with operable lung cancer compared with usual care (control). | Usual care plus self-management program (exercise and education); usual care | Full analysis population (§0) | EORTC QLQ-c30 and LC13 domain and single item scores at 3-, 6- and 12-months post- surgery                                                                                                                                                | While-alive strategy             | Absolute difference in mean change in HRQoL score from baseline between groups at 3-, 6- and 12-months post-surgery.                              | As per Table 6 with additional contrasts for comparisons at 6- and 12-months post-surgery. |
| To assess the effect of a self-management program (exercise and education) on <b>fatigue</b> in patients with operable lung cancer compared with usual care (control).                                             | Usual care plus self-management program (exercise and education); usual care | Full analysis population (§0) | Brief fatigue inventory global score at 3- and 6-months post-surgery                                                                                                                                                                      | While-alive strategy             | Absolute difference in mean change in fatigue score from baseline between groups at 3- and 6-months post-surgery.                                 | As per Table 6 with additional contrasts for comparisons at 6 months post-surgery.         |
| To assess the effect of a self-management program (exercise and education) on <b>sleep</b> in patients with operable lung cancer compared with usual care (control).                                               | Usual care plus self-management program (exercise and education); usual care | Full analysis population (§0) | Sleep disturbance-short form 8b PROMIS Item Bank sleep T-score at 3- and 6-months post-surgery                                                                                                                                            | While-alive strategy             | Absolute difference in mean change in sleep T-score from baseline between groups at 3- and 6-months post-surgery.                                 | As per Table 6 with additional contrasts for comparisons at 6 months post-surgery.         |
| To assess the effect of a self-management program (exercise and education) on <b>distress</b> in patients with operable lung cancer compared with usual care (control).                                            | Usual care plus self-management program (exercise and education); usual care | Full analysis population (§0) | Distress thermometer at 3- and 6-months post-surgery                                                                                                                                                                                      | While-alive strategy             | Absolute difference in mean change in distress score from baseline between groups at 3- and 6-months post-surgery.                                | As per Table 6 with additional contrasts for comparisons at 6 post-surgery.                |
| To assess the effect of a self-management program (exercise and education) on <b>financial toxicity</b> in patients with operable lung cancer compared with usual care (control).                                  | Usual care plus self-management program (exercise and education); usual care | Full analysis population (§0) | COmprehensive score for financial toxicity (COST) at 3- and 6-months post-surgery                                                                                                                                                         | While-alive strategy             | Absolute difference in mean change in financial toxicity score from baseline between groups at 3- and 6-months post-surgery.                      | As per Table 6 with additional contrasts for comparisons at 6 months post-surgery.         |
| To assess the effect of a self-management program (exercise and education) on <b>survival</b> in patients with operable lung cancer compared with usual care (control).                                            | Usual care plus self-management program (exercise and education); usual care | Full analysis population (§0) | Survival status at 12 months post-surgery                                                                                                                                                                                                 | While-alive strategy             | Hazard ratio with usual care as the reference.                                                                                                    | Kaplan-Meier method to estimate survival probability at 12 months in each arm              |

|                                                                                                                                                                                                |                                                                              |                               |                                                                                                                    |                      |                                                                                           |                                                                                     |
|------------------------------------------------------------------------------------------------------------------------------------------------------------------------------------------------|------------------------------------------------------------------------------|-------------------------------|--------------------------------------------------------------------------------------------------------------------|----------------------|-------------------------------------------------------------------------------------------|-------------------------------------------------------------------------------------|
|                                                                                                                                                                                                |                                                                              |                               |                                                                                                                    |                      |                                                                                           | with corresponding 95% CI. Hazard ratio and 95% CI with control as reference.       |
| To assess the effect of a self-management program (exercise and education) on <b>return to work/usual activities</b> in patients with operable lung cancer compared with usual care (control). | Usual care plus self-management program (exercise and education); usual care | Full analysis population (S0) | Number of weeks to usual activities for those not employed and number of weeks to return to work in those employed | While-alive strategy | Difference in mean time (in weeks) to return to work (or usual activities) between groups | An accelerated failure time survival model to estimate the difference between arms. |

1834 Intercurrent event for all objectives is death

1835

1836



## 1837 6.4 Exploratory Efficacy Analyses

### 1838 6.4.1 Complier average causal effect

1839 A sensitivity analysis will estimate the treatment effect on the primary outcome assuming adherence  
1840 to the intervention, as defined in Section 0. The complier average causal effect will be estimated  
1841 using an instrumental variables approach where randomisation is the instrument for adherence.

1842 Two-stage least square models will be fit, with complier average causal effects (CACE) reported with  
1843 95% confidence intervals and  $p$ -values.

1844 If there is missing data in the primary outcome at 3 months consideration will be made to use  
1845 multiple imputation for the purpose of performing the CACE analysis as an additional analysis.

1846

### 1847 6.4.2 Subgroup analyses

1848 An exploratory subgroup analysis based on postoperative cancer treatment will be performed for  
1849 the primary outcome at 3-months post-surgery using the full analysis population. The subgroups are:

1850 i. Postoperative cancer treatment: postoperative treatment/postoperative chemotherapy,  
1851 radiotherapy or chemoradiotherapy

1852 ii. No postoperative cancer treatment: postoperative treatment/postoperative chemotherapy,  
1853 radiotherapy or chemoradiotherapy

1854 Heterogeneity of the intervention effect according to postoperative cancer treatment (no  
1855 postoperative treatment/postoperative chemotherapy, radiotherapy or chemoradiotherapy) will be  
1856 assessed by including interactions between postoperative treatment and study group. The model  
1857 will include as covariates the stratification factors used in randomisation, and an interaction term  
1858 estimating the interaction between the intervention and the subgroup variable. Specific subgroup  
1859 intervention effect estimates and corresponding 95% confidence intervals will be presented  
1860 obtained from the model along with the interaction  $p$ -value. If there is no evidence of interaction ( $p$ -  
1861 value  $>0.05$ ), any differences between subgroups will be regarded as due to chance.

## 1862 7 SAFETY ANALYSES

1863 Safety outcomes will be reported for the intervention group only. For all minor and serious adverse  
1864 events, data including pseudo study ID, date/time of adverse event, description of the adverse event  
1865 and action taken will be reported for each participant experiencing an adverse event as a line listing.

### 1866 7.1 Adverse Events

1867 The following adverse events will be reported:

- 1868 • fall not resulting in injury
- 1869 • severe breathlessness
- 1870 • new or progressive pain
- 1871 • neurological deficits
- 1872 • altered mental status
- 1873 • palpitations
- 1874 • light headedness
- 1875 • progressive fatigue
- 1876 • progressive anorexia

1877

1878 Adverse events reported as “Other” will be reviewed and assessed by the PI if they should also be  
1879 reported. The number and percentage of participants with at least one adverse event will be  
1880 reported along with the total number of episodes for adverse events. This will also be provided for  
1881 each type of adverse event (listed above) separately.

## 1882 7.2 Serious Adverse Events

1883 The number and percentage of participants with at least one serious adverse event will be reported  
1884 along with the total number of serious adverse events. This will also be provided for each type of  
1885 serious adverse event (life-threatening or result in death or hospitalisation (or prolongation of  
1886 hospitalisation), incapacity or disability) separately.

## 1887 8 FIGURES

1888 Where appropriate, graphical displays of the primary and secondary analyses will be given and  
1889 convey information display in a corresponding summary table. A list and template for the planned  
1890 figures is provided in Appendix A and Appendix B.

## 1891 9 REPORTING CONVENTIONS

- 1892 • The mean, standard deviation, and any other statistics other than quantiles, will be  
1893 reported to one decimal place greater than the original data.
- 1894 • Quantiles, such as median, or minimum and maximum will use the same number of  
1895 decimal places as the original data.
- 1896 • Percentages will be reported with no decimal place for sample sizes less than 100 and with  
1897 1 decimal point if greater than 100.
- 1898 • Estimated parameters, not on the same scale as raw observations (e.g. regression  
1899 coefficients) will be reported to 3 significant figures.
- 1900 •  $p$ -values  $>0.0001$  will be reported to 4 decimal places;  $p$ -values less than 0.0001 will be  
1901 reported as “ $<0.0001$ ”. This follows the guidelines from the target journal *Thorax*.
- 1902 • In any cells in a row of data for which no data are reported, two mid-dots (··) will be included  
1903 in the table and NA (Not Applicable) as a footnote.

1904 For publication purposes, if the target journals guidelines differ in their reporting conventions to  
1905 those listed above, the reporting will change to reflect the guidelines of the journal.

## 1906 10 TECHNICAL DETAILS

1907 Analysis will be conducted using Stata/SE for Windows version 17.0 (64-bit, x64). We will report the  
1908 software and version used at the time of reporting.

## 1909 11 SUMMARY OF CHANGES TO THE PROTOCOL

1910 Due to various constraints, outcomes noted in sections 0 and 0 that were specified in the trial  
1911 protocol will not be included in this analysis.

1912

1913

1914  
1915

## APPENDIX A – TABLE AND FIGURE LISTING FOR THE FINAL REPORT

| <b>Heading</b> | <b>Title</b>                                                        | <b>Population Set</b> |
|----------------|---------------------------------------------------------------------|-----------------------|
| Figure 1       | The CONSORT flow chart                                              | Not applicable        |
| Figure 2       | Measures over time                                                  | Randomised            |
| Figure 3       | Kaplan-Meier survival curve                                         | Randomised            |
| Table 1.1      | Summary of Subject Disposition during study period                  | Randomised            |
| Table 1.2      | Summary of Baseline Characteristics by treatment arm and overall    | Randomised            |
| Table 1.3      | Summary of treatment compliance                                     | Randomised            |
| Table 2        | Summary of primary outcome by treatment arm                         | Randomised            |
| Table 3.1      | Summary of secondary outcomes with measures at baseline             | Randomised            |
| Table 3.2      | Summary of secondary outcome – IPAQ-SF categorical outcome activity | Randomised            |
| Table 3.3      | Summary of survival secondary outcome                               | Randomised            |
| Table 3.4      | Summary of secondary outcome return to work/usual activities        | Randomised            |
| Table 4        | Summary of Adverse Events (Intervention arm only)                   | Safety                |
| Table 5.1      | Summary of Serious Adverse Events (Intervention arm only)           | Safety                |
| Table 5.2      | Listing of Serious Adverse Events (Intervention arm only)           | Safety                |

1916

1917 All figures and tables will be repeated for the Per Protocol analysis population described in Section 0.

1918

1919

1922 Figure 1 – CONSORT Flow Chart

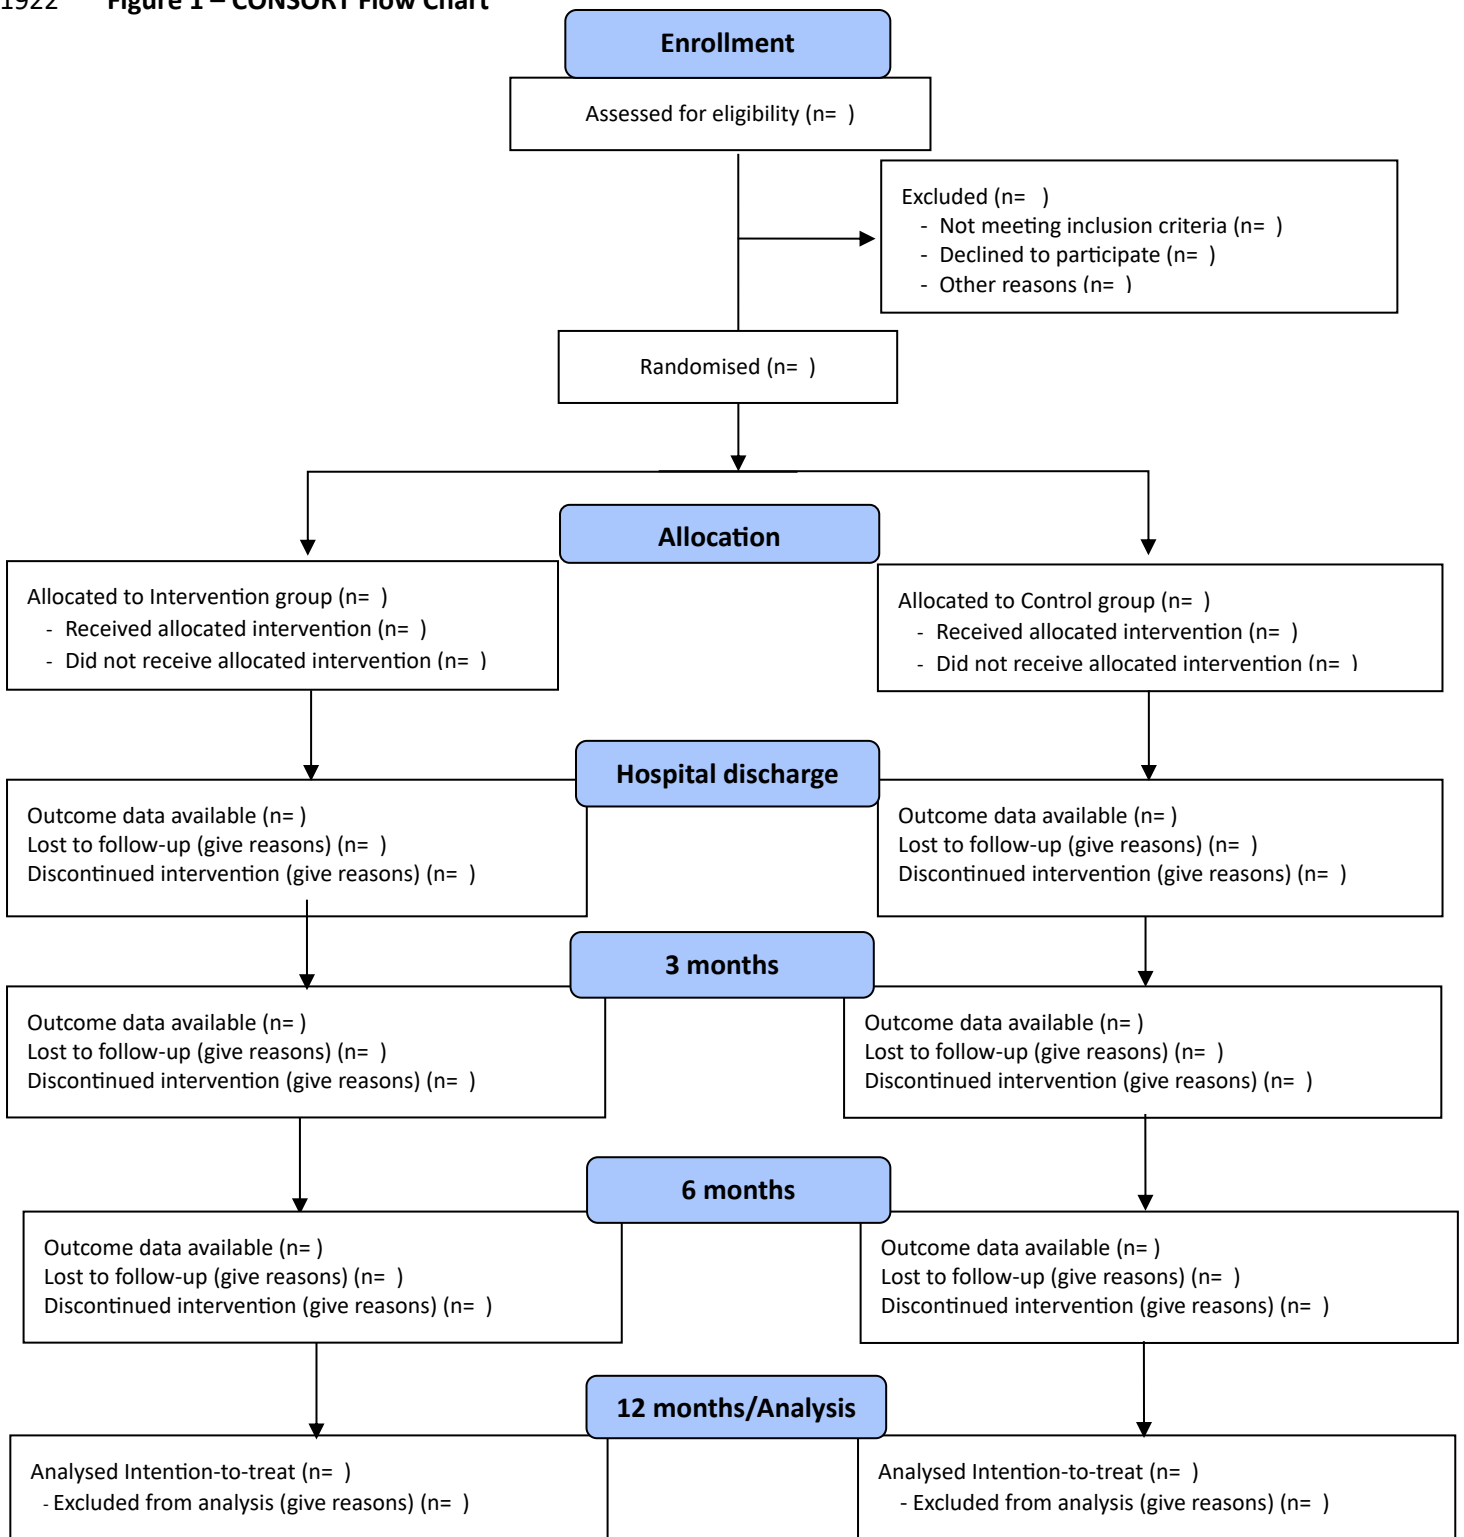

1923 **Figure 2 Measures over time (presented as mean and 95% confidence interval)**

1924 Mock example of QLQ-c30 Global score

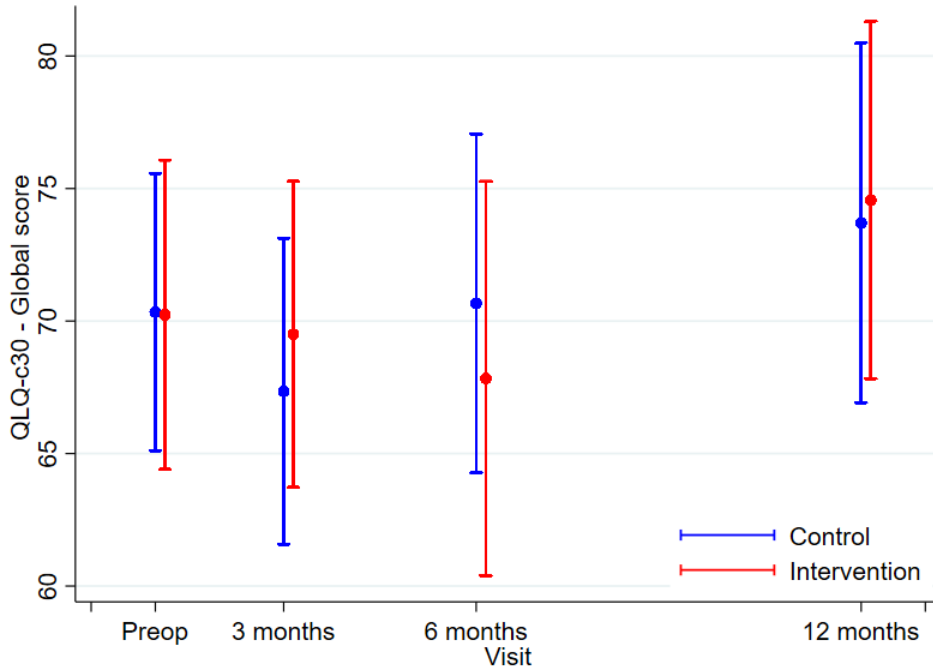

1925

1926

1927

1928 **Figure 3 Kaplan-Meier survival curve**

1929 Mock example of survival curve

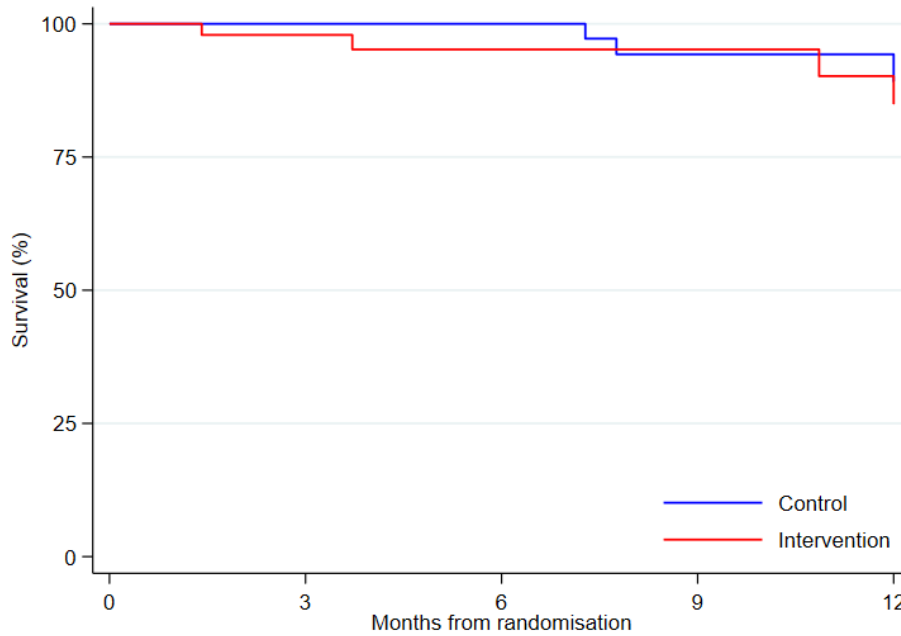

Number at risk

|              | 0  | 3  | 6  | 9  | 12 |
|--------------|----|----|----|----|----|
| Control      | 58 | 47 | 37 | 25 | 18 |
| Intervention | 58 | 38 | 30 | 20 | 17 |

1930

1931

1932

1933

1934

1935

1936 **Table 1.1 - Summary of Subject Disposition during study period**

| Subject disposition          | Control group<br>N= | Intervention<br>N= | All subjects<br>N= |
|------------------------------|---------------------|--------------------|--------------------|
| Randomised                   |                     |                    |                    |
| Discharged from hospital     |                     |                    |                    |
| 3 months post-surgery        |                     |                    |                    |
| 6 months post-surgery        |                     |                    |                    |
| 12 months post-surgery       |                     |                    |                    |
| Early discontinuation        |                     |                    |                    |
| Reason for discontinuation * |                     |                    |                    |
| Death                        |                     |                    |                    |
| Toxicity                     |                     |                    |                    |
| Treatment failure            |                     |                    |                    |
| Withdrew consent             |                     |                    |                    |
| Other                        |                     |                    |                    |

1937 Data are presented as n (%).

1938 \*More than one reason possible for discontinuation/withdrawal

1939

1940 **Table 1.2 - Summary of Baseline Characteristics**

1941 *Note: There may be some categorical variables such as occupation status and education level that*  
 1942 *will be reported based on collapsed similar categories or low frequencies. This will be decided at the*  
 1943 *discretion of the principle investigator.*

| Characteristic           | Statistic    | Control group<br>N= | Intervention<br>N= | All subjects<br>N= |
|--------------------------|--------------|---------------------|--------------------|--------------------|
| Age at surgery, years    | Mean (SD)    |                     |                    |                    |
|                          | Median [IQR] |                     |                    |                    |
|                          | Min- Max     |                     |                    |                    |
| Sex                      |              |                     |                    |                    |
| Male                     | n (%)        |                     |                    |                    |
| Female                   | n (%)        |                     |                    |                    |
| CAPACITY study site      |              |                     |                    |                    |
| Royal Melbourne Hospital | n (%)        |                     |                    |                    |
| St Vincent's Hospital    | n (%)        |                     |                    |                    |
| ECOG performance status  |              |                     |                    |                    |
| 0                        | n (%)        |                     |                    |                    |
| 1                        | n (%)        |                     |                    |                    |
| 2                        | n (%)        |                     |                    |                    |
| Cancer histological type |              |                     |                    |                    |
| Squamous                 | n (%)        |                     |                    |                    |
| Adenocarcinoma           | n (%)        |                     |                    |                    |
| Large cell               | n (%)        |                     |                    |                    |
| Other                    | n (%)        |                     |                    |                    |
| - Other cancer type      | n (%)        |                     |                    |                    |
| - Non cancer             | n (%)        |                     |                    |                    |
| Cancer stage             |              |                     |                    |                    |
| Stage IA                 | n (%)        |                     |                    |                    |

| Characteristic                       | Statistic    | Control group<br>N= | Intervention<br>N= | All subjects<br>N= |
|--------------------------------------|--------------|---------------------|--------------------|--------------------|
| Stage IB                             | n (%)        |                     |                    |                    |
| Stage IIA                            | n (%)        |                     |                    |                    |
| Stage IIB                            | n (%)        |                     |                    |                    |
| Stage IIIA                           | n (%)        |                     |                    |                    |
| Stage IV                             | n (%)        |                     |                    |                    |
| Any co-morbidities                   | n (%)        |                     |                    |                    |
| - COPD                               | n (%)        |                     |                    |                    |
| - Tobacco consumption                | n (%)        |                     |                    |                    |
| - Diabetes                           | n (%)        |                     |                    |                    |
| - Renal insufficiency                | n (%)        |                     |                    |                    |
| - Cardiovascular                     | n (%)        |                     |                    |                    |
| - Neoplastic                         | n (%)        |                     |                    |                    |
| - Alcoholism                         | n (%)        |                     |                    |                    |
| Colinet co-morbidity Score           | Mean (SD)    |                     |                    |                    |
|                                      | Median [IQR] |                     |                    |                    |
|                                      | Min-Max      |                     |                    |                    |
| 0 (No comorbidities)                 | n (%)        |                     |                    |                    |
| 1                                    | n (%)        |                     |                    |                    |
| 2                                    | n (%)        |                     |                    |                    |
| 3                                    | n (%)        |                     |                    |                    |
| 4                                    | n (%)        |                     |                    |                    |
| 5                                    | n (%)        |                     |                    |                    |
| 6                                    | n (%)        |                     |                    |                    |
| 7 (all co-morbidities above)         | n (%)        |                     |                    |                    |
| Race/ethnicity                       |              |                     |                    |                    |
| White                                | n (%)        |                     |                    |                    |
| Black/African American               | n (%)        |                     |                    |                    |
| Asian                                | n (%)        |                     |                    |                    |
| American Indian or Alaska Native     | n (%)        |                     |                    |                    |
| Native Hawaiian/Pacific Islander     | n (%)        |                     |                    |                    |
| More than one race                   | n (%)        |                     |                    |                    |
| Unknown                              | n (%)        |                     |                    |                    |
| Body mass index                      | Mean (SD)    |                     |                    |                    |
|                                      | Median [IQR] |                     |                    |                    |
|                                      | Min-Max      |                     |                    |                    |
| Smoking history                      |              |                     |                    |                    |
| Never smoked                         | n (%)        |                     |                    |                    |
| Quit smoking longer than 8 weeks ago | n (%)        |                     |                    |                    |
| Current smoker                       | n (%)        |                     |                    |                    |
| Education                            |              |                     |                    |                    |
| No formal schooling                  | n (%)        |                     |                    |                    |
| Finished primary schooling           | n (%)        |                     |                    |                    |

| Characteristic                                          | Statistic    | Control group<br>N= | Intervention<br>N= | All subjects<br>N= |
|---------------------------------------------------------|--------------|---------------------|--------------------|--------------------|
| Some or completed secondary or high school              | n (%)        |                     |                    |                    |
| Some or completed trade, community or TAFE college      | n (%)        |                     |                    |                    |
| Some university                                         | n (%)        |                     |                    |                    |
| Completed Bachelor's degree                             | n (%)        |                     |                    |                    |
| Completed Masters or PhD degree                         | n (%)        |                     |                    |                    |
| Other                                                   | n (%)        |                     |                    |                    |
| <b>Occupational status</b>                              |              |                     |                    |                    |
| Working - Full Time (at least 35 hours per week)        | n (%)        |                     |                    |                    |
| Working - Part Time (less than 35 hours per week)       | n (%)        |                     |                    |                    |
| On paid or unpaid sick leave, but still employed        | n (%)        |                     |                    |                    |
| Temporarily laid off (without pay)                      | n (%)        |                     |                    |                    |
| Unemployed                                              | n (%)        |                     |                    |                    |
| Going to school                                         | n (%)        |                     |                    |                    |
| Home maker/home duties/child care/elder care/ volunteer | n (%)        |                     |                    |                    |
| Retired with/without any paid work                      | n (%)        |                     |                    |                    |
| Receiving disability payments                           | n (%)        |                     |                    |                    |
| Awaiting approval for disability payments               | n (%)        |                     |                    |                    |
| Other                                                   | n (%)        |                     |                    |                    |
| Don't know                                              | n (%)        |                     |                    |                    |
| No answer                                               | n (%)        |                     |                    |                    |
| <b>Living arrangement</b>                               |              |                     |                    |                    |
| Home alone                                              | n (%)        |                     |                    |                    |
| Home with family                                        | n (%)        |                     |                    |                    |
| Home with supports                                      | n (%)        |                     |                    |                    |
| Retirement village                                      | n (%)        |                     |                    |                    |
| Nursing home – low level care                           | n (%)        |                     |                    |                    |
| Nursing home – high level care                          | n (%)        |                     |                    |                    |
| Other                                                   | n (%)        |                     |                    |                    |
| <b>Respiratory function</b>                             |              |                     |                    |                    |
| - FVC in litres actual                                  | Mean (SD)    |                     |                    |                    |
|                                                         | Median [IQR] |                     |                    |                    |
|                                                         | Min-Max      |                     |                    |                    |
| - FVC in percent predicted                              | Mean (SD)    |                     |                    |                    |
|                                                         | Median [IQR] |                     |                    |                    |
|                                                         | Min-Max      |                     |                    |                    |
| - FEV1 in litres actual                                 | Mean (SD)    |                     |                    |                    |
|                                                         | Median [IQR] |                     |                    |                    |
|                                                         | Min-Max      |                     |                    |                    |



| Characteristic                       | Statistic    | Control group<br>N= | Intervention<br>N= | All subjects<br>N= |
|--------------------------------------|--------------|---------------------|--------------------|--------------------|
| - FEV1 in percent predicted          | Mean (SD)    |                     |                    |                    |
|                                      | Median [IQR] |                     |                    |                    |
|                                      | Min-Max      |                     |                    |                    |
| - FEV1/FVC ratio                     | Mean (SD)    |                     |                    |                    |
|                                      | Median [IQR] |                     |                    |                    |
|                                      | Min-Max      |                     |                    |                    |
| - DLCO in ml/mmHg/min actual         | Mean (SD)    |                     |                    |                    |
|                                      | Median [IQR] |                     |                    |                    |
|                                      | Min-Max      |                     |                    |                    |
| - DLCO in percent predicted          | Mean (SD)    |                     |                    |                    |
|                                      | Median [IQR] |                     |                    |                    |
|                                      | Min-Max      |                     |                    |                    |
| <b>Surgical and hospital details</b> |              |                     |                    |                    |
| Type of surgery                      |              |                     |                    |                    |
| Lobectomy                            | n (%)        |                     |                    |                    |
| Segmentectomy                        | n (%)        |                     |                    |                    |
| Wedge resection                      | n (%)        |                     |                    |                    |
| Pneumonectomy                        | n (%)        |                     |                    |                    |
| Other (including combination)        | n (%)        |                     |                    |                    |
| Surgery side                         |              |                     |                    |                    |
| Left                                 | n (%)        |                     |                    |                    |
| Right                                | n (%)        |                     |                    |                    |
| Surgery approach                     |              |                     |                    |                    |
| Thoracotomy                          | n (%)        |                     |                    |                    |
| VATS or RATS                         | n (%)        |                     |                    |                    |
| Other                                | n (%)        |                     |                    |                    |
| Hospital length of stay, days        | Mean (SD)    |                     |                    |                    |
|                                      | Median [IQR] |                     |                    |                    |
|                                      | Min-Max      |                     |                    |                    |
| Any postoperative complications      |              |                     |                    |                    |
| ICU admission                        | n (%)        |                     |                    |                    |
| Main reason for ICU admission        |              |                     |                    |                    |
| Respiratory                          | n (%)        |                     |                    |                    |
| Cardiovascular                       | n (%)        |                     |                    |                    |
| Neurological                         | n (%)        |                     |                    |                    |
| Renal                                | n (%)        |                     |                    |                    |
| Other                                | n (%)        |                     |                    |                    |
| ICU length of stay (days)            | Mean (SD)    |                     |                    |                    |
|                                      | Median [IQR] |                     |                    |                    |
|                                      | Min-Max      |                     |                    |                    |
| ICU intubation                       | n (%)        |                     |                    |                    |
| Mobility status                      |              |                     |                    |                    |

| Characteristic                                   | Statistic | Control group<br>N= | Intervention<br>N= | All subjects<br>N= |
|--------------------------------------------------|-----------|---------------------|--------------------|--------------------|
| - Use of gait aid                                | n (%)     |                     |                    |                    |
| SPS                                              | n (%)     |                     |                    |                    |
| 2WF/4WF                                          | n (%)     |                     |                    |                    |
| GWF                                              | n (%)     |                     |                    |                    |
| Crutches                                         | n (%)     |                     |                    |                    |
| Other                                            | n (%)     |                     |                    |                    |
| - Level of independence                          |           |                     |                    |                    |
| Independent                                      | n (%)     |                     |                    |                    |
| 1xA                                              | n (%)     |                     |                    |                    |
| 2xA                                              | n (%)     |                     |                    |                    |
| Step t/f (1-2xA)                                 | n (%)     |                     |                    |                    |
| Hoist t/f only                                   | n (%)     |                     |                    |                    |
| Discharge destination                            |           |                     |                    |                    |
| Home alone                                       | n (%)     |                     |                    |                    |
| Home with family                                 | n (%)     |                     |                    |                    |
| Home with friends                                | n (%)     |                     |                    |                    |
| GEM                                              | n (%)     |                     |                    |                    |
| Inpatient rehab                                  | n (%)     |                     |                    |                    |
| TCP (awaiting nursing home placement or respite) | n (%)     |                     |                    |                    |
| Respite                                          | n (%)     |                     |                    |                    |
| Nursing home                                     | n (%)     |                     |                    |                    |
| Other                                            | n (%)     |                     |                    |                    |
| <b>Post-operative therapy</b>                    |           |                     |                    |                    |
| Type of chemotherapy or radiotherapy             |           |                     |                    |                    |
| No chemo or RT                                   | n (%)     |                     |                    |                    |
| Post-op radical chemoRT                          | n (%)     |                     |                    |                    |
| Post-op stereotactic radio (radical)             | n (%)     |                     |                    |                    |
| Post-op palliative radiotherapy                  | n (%)     |                     |                    |                    |
| Post-op palliative chemotherapy                  | n (%)     |                     |                    |                    |
| Post-op chemotherapy                             | n (%)     |                     |                    |                    |
| Other                                            | n (%)     |                     |                    |                    |

1944 Note: If data are missing for a variable then an additional row will be included reporting the number  
1945 of missing observation for that variable

1946

1947

1948

1949

1950

1951  
1952

**Table 1.3 – Summary of treatment compliance (Intervention arm only)**

| Treatment compliance | Percentage |
|----------------------|------------|
| Adherence rate       |            |
| Completion rate      |            |

1953 Note: Adherence rate will be reported as the percentage of consultations delivered over the 12 weeks  
1954 (number delivered against target of 12 sessions). Completion rate will be reported as the percentage of  
1955 participants who continue consultations to 12 weeks.  
1956

1957 **Table 2 - Summary of primary outcome by treatment arm (Full analysis population)**

| Primary Outcome                                                                       | Control group<br>N=<br>Mean ± SD | Intervention<br>N=<br>Mean ± SD | Estimate (95% CI)<br>(Absolute difference:<br>Intervention minus<br>control) | p-value |
|---------------------------------------------------------------------------------------|----------------------------------|---------------------------------|------------------------------------------------------------------------------|---------|
| EORTC QLQ-c30 Physical function score                                                 |                                  |                                 |                                                                              |         |
| <i>Complier average causal effect<br/>(Sensitivity analysis)</i>                      |                                  |                                 |                                                                              |         |
| <i>Complier average causal effect<br/>(Sensitivity analysis, multiple imputation)</i> |                                  |                                 |                                                                              |         |
| <i>Subgroup analysis (\$0/\$0)</i>                                                    |                                  |                                 |                                                                              |         |
| Postoperative cancer treatment                                                        |                                  |                                 |                                                                              |         |
| No postoperative cancer treatment                                                     |                                  |                                 |                                                                              |         |

1958 Note: Mean change from baseline at 3 months post-surgery

1959  
1960

**Table 3.1 - Summary of continuous secondary outcomes with measures at baseline**

| Secondary Outcome*                                  | Control group<br>N=<br>Mean ± SD | Intervention<br>N=<br>Mean ± SD | Estimate (95% CI)<br>(Absolute difference:<br>Intervention minus control) |
|-----------------------------------------------------|----------------------------------|---------------------------------|---------------------------------------------------------------------------|
| <b>Physical Function</b>                            |                                  |                                 |                                                                           |
| EORTC QLQ-c30 Physical function score               |                                  |                                 |                                                                           |
| At 6-months post-surgery                            |                                  |                                 |                                                                           |
| At 12-months post-surgery                           |                                  |                                 |                                                                           |
| SPPB overall score                                  |                                  |                                 |                                                                           |
| At 3-months post-surgery                            |                                  |                                 |                                                                           |
| At 6-months post-surgery                            |                                  |                                 |                                                                           |
| SPPB gait score                                     |                                  |                                 |                                                                           |
| At 3-months post-surgery                            |                                  |                                 |                                                                           |
| At 6-months post-surgery                            |                                  |                                 |                                                                           |
| SPPB balance score                                  |                                  |                                 |                                                                           |
| At 3-months post-surgery                            |                                  |                                 |                                                                           |
| At 6-months post-surgery                            |                                  |                                 |                                                                           |
| SPPB chair                                          |                                  |                                 |                                                                           |
| At 3 months post-surgery                            |                                  |                                 |                                                                           |
| At 6-months post-surgery                            |                                  |                                 |                                                                           |
| <b>Physical activity (levels and self-efficacy)</b> |                                  |                                 |                                                                           |
| IPAQ-SF total MET (minutes/week)                    |                                  |                                 |                                                                           |
| At 3 months post-surgery                            |                                  |                                 |                                                                           |
| At 6-months post-surgery                            |                                  |                                 |                                                                           |
| <i>Self-efficacy scales</i>                         |                                  |                                 |                                                                           |

| <b>Secondary Outcome*</b>                                  | <b>Control group<br/>N=<br/>Mean ± SD</b> | <b>Intervention<br/>N=<br/>Mean ± SD</b> | <b>Estimate (95% CI)<br/>(Absolute difference:<br/>Intervention minus control)</b> |
|------------------------------------------------------------|-------------------------------------------|------------------------------------------|------------------------------------------------------------------------------------|
| Barriers                                                   |                                           |                                          |                                                                                    |
| At 3 months post-surgery                                   |                                           |                                          |                                                                                    |
| At 6-months post-surgery                                   |                                           |                                          |                                                                                    |
| Tasks                                                      |                                           |                                          |                                                                                    |
| At 3 months post-surgery                                   |                                           |                                          |                                                                                    |
| At 6-months post-surgery                                   |                                           |                                          |                                                                                    |
| Walking                                                    |                                           |                                          |                                                                                    |
| At 3 months post-surgery                                   |                                           |                                          |                                                                                    |
| At 6-months post-surgery                                   |                                           |                                          |                                                                                    |
| <b>Muscle Strength and Function</b>                        |                                           |                                          |                                                                                    |
| Quadriceps strength (peak force)                           |                                           |                                          |                                                                                    |
| At 3 months post-surgery                                   |                                           |                                          |                                                                                    |
| At 6-months post-surgery                                   |                                           |                                          |                                                                                    |
| Quadriceps strength (time to peak force)                   |                                           |                                          |                                                                                    |
| At 3 months post-surgery                                   |                                           |                                          |                                                                                    |
| At 6-months post-surgery                                   |                                           |                                          |                                                                                    |
| Hand group strength (peak force)                           |                                           |                                          |                                                                                    |
| At 3 months post-surgery                                   |                                           |                                          |                                                                                    |
| At 6-months post-surgery                                   |                                           |                                          |                                                                                    |
| Hand group strength (time peak force)                      |                                           |                                          |                                                                                    |
| At 3 months post-surgery                                   |                                           |                                          |                                                                                    |
| At 6-months post-surgery                                   |                                           |                                          |                                                                                    |
| <b>Health-Related Quality of Life (HRQoL) and symptoms</b> |                                           |                                          |                                                                                    |
| <i>EORTC QLQ-c30 scales</i>                                |                                           |                                          |                                                                                    |
| Global health status/QoL                                   |                                           |                                          |                                                                                    |
| At 3 months post-surgery                                   |                                           |                                          |                                                                                    |
| At 6-months post-surgery                                   |                                           |                                          |                                                                                    |
| At 12-months post-surgery                                  |                                           |                                          |                                                                                    |
| Role functioning                                           |                                           |                                          |                                                                                    |
| At 3 months post-surgery                                   |                                           |                                          |                                                                                    |
| At 6-months post-surgery                                   |                                           |                                          |                                                                                    |
| At 12-months post-surgery                                  |                                           |                                          |                                                                                    |
| Emotional functioning                                      |                                           |                                          |                                                                                    |
| At 3 months post-surgery                                   |                                           |                                          |                                                                                    |
| At 6-months post-surgery                                   |                                           |                                          |                                                                                    |
| At 12-months post-surgery                                  |                                           |                                          |                                                                                    |
| Cognitive functioning                                      |                                           |                                          |                                                                                    |
| At 3 months post-surgery                                   |                                           |                                          |                                                                                    |
| At 6-months post-surgery                                   |                                           |                                          |                                                                                    |
| At 12-months post-surgery                                  |                                           |                                          |                                                                                    |
| Social functioning                                         |                                           |                                          |                                                                                    |
| At 3 months post-surgery                                   |                                           |                                          |                                                                                    |
| At 6-months post-surgery                                   |                                           |                                          |                                                                                    |
| At 12-months post-surgery                                  |                                           |                                          |                                                                                    |
| Fatigue                                                    |                                           |                                          |                                                                                    |
| At 3 months post-surgery                                   |                                           |                                          |                                                                                    |

| <b>Secondary Outcome*</b>           | <b>Control group<br/>N=<br/>Mean ± SD</b> | <b>Intervention<br/>N=<br/>Mean ± SD</b> | <b>Estimate (95% CI)<br/>(Absolute difference:<br/>Intervention minus control)</b> |
|-------------------------------------|-------------------------------------------|------------------------------------------|------------------------------------------------------------------------------------|
| At 6-months post-surgery            |                                           |                                          |                                                                                    |
| At 12-months post-surgery           |                                           |                                          |                                                                                    |
| <b>Nausea and vomiting</b>          |                                           |                                          |                                                                                    |
| At 3 months post-surgery            |                                           |                                          |                                                                                    |
| At 6-months post-surgery            |                                           |                                          |                                                                                    |
| At 12-months post-surgery           |                                           |                                          |                                                                                    |
| <b>Pain</b>                         |                                           |                                          |                                                                                    |
| At 3 months post-surgery            |                                           |                                          |                                                                                    |
| At 6-months post-surgery            |                                           |                                          |                                                                                    |
| At 12-months post-surgery           |                                           |                                          |                                                                                    |
| <b>Dyspnoea</b>                     |                                           |                                          |                                                                                    |
| At 3 months post-surgery            |                                           |                                          |                                                                                    |
| At 6-months post-surgery            |                                           |                                          |                                                                                    |
| At 12-months post-surgery           |                                           |                                          |                                                                                    |
| <b>Insomnia</b>                     |                                           |                                          |                                                                                    |
| At 3 months post-surgery            |                                           |                                          |                                                                                    |
| At 6-months post-surgery            |                                           |                                          |                                                                                    |
| At 12-months post-surgery           |                                           |                                          |                                                                                    |
| <b>Appetite loss</b>                |                                           |                                          |                                                                                    |
| At 3 months post-surgery            |                                           |                                          |                                                                                    |
| At 6-months post-surgery            |                                           |                                          |                                                                                    |
| At 12-months post-surgery           |                                           |                                          |                                                                                    |
| <b>Constipation</b>                 |                                           |                                          |                                                                                    |
| At 3 months post-surgery            |                                           |                                          |                                                                                    |
| At 6-months post-surgery            |                                           |                                          |                                                                                    |
| At 12-months post-surgery           |                                           |                                          |                                                                                    |
| <b>Diarrhoea</b>                    |                                           |                                          |                                                                                    |
| At 3 months post-surgery            |                                           |                                          |                                                                                    |
| At 6-months post-surgery            |                                           |                                          |                                                                                    |
| At 12-months post-surgery           |                                           |                                          |                                                                                    |
| <b>Financial difficulties</b>       |                                           |                                          |                                                                                    |
| At 3 months post-surgery            |                                           |                                          |                                                                                    |
| At 6-months post-surgery            |                                           |                                          |                                                                                    |
| At 12-months post-surgery           |                                           |                                          |                                                                                    |
| <b><i>EORTC QLQ-LC13 scales</i></b> |                                           |                                          |                                                                                    |
| <b>Dyspnoea</b>                     |                                           |                                          |                                                                                    |
| At 3 months post-surgery            |                                           |                                          |                                                                                    |
| At 6-months post-surgery            |                                           |                                          |                                                                                    |
| At 12-months post-surgery           |                                           |                                          |                                                                                    |
| <b>Coughing</b>                     |                                           |                                          |                                                                                    |
| At 3 months post-surgery            |                                           |                                          |                                                                                    |
| At 6-months post-surgery            |                                           |                                          |                                                                                    |
| At 12-months post-surgery           |                                           |                                          |                                                                                    |
| <b>Haemoptysis</b>                  |                                           |                                          |                                                                                    |
| At 3 months post-surgery            |                                           |                                          |                                                                                    |
| At 6-months post-surgery            |                                           |                                          |                                                                                    |

| <b>Secondary Outcome*</b>                                                 | <b>Control group<br/>N=<br/>Mean ± SD</b> | <b>Intervention<br/>N=<br/>Mean ± SD</b> | <b>Estimate (95% CI)<br/>(Absolute difference:<br/>Intervention minus control)</b> |
|---------------------------------------------------------------------------|-------------------------------------------|------------------------------------------|------------------------------------------------------------------------------------|
| At 12-months post-surgery                                                 |                                           |                                          |                                                                                    |
| <b>Sore mouth</b>                                                         |                                           |                                          |                                                                                    |
| At 3 months post-surgery                                                  |                                           |                                          |                                                                                    |
| At 6-months post-surgery                                                  |                                           |                                          |                                                                                    |
| At 12-months post-surgery                                                 |                                           |                                          |                                                                                    |
| <b>Dysphagia</b>                                                          |                                           |                                          |                                                                                    |
| At 3 months post-surgery                                                  |                                           |                                          |                                                                                    |
| At 6-months post-surgery                                                  |                                           |                                          |                                                                                    |
| At 12-months post-surgery                                                 |                                           |                                          |                                                                                    |
| <b>Peripheral neuropathy</b>                                              |                                           |                                          |                                                                                    |
| At 3 months post-surgery                                                  |                                           |                                          |                                                                                    |
| At 6-months post-surgery                                                  |                                           |                                          |                                                                                    |
| At 12-months post-surgery                                                 |                                           |                                          |                                                                                    |
| <b>Alopecia</b>                                                           |                                           |                                          |                                                                                    |
| At 3 months post-surgery                                                  |                                           |                                          |                                                                                    |
| At 6-months post-surgery                                                  |                                           |                                          |                                                                                    |
| At 12-months post-surgery                                                 |                                           |                                          |                                                                                    |
| <b>Pain in chest</b>                                                      |                                           |                                          |                                                                                    |
| At 3 months post-surgery                                                  |                                           |                                          |                                                                                    |
| At 6-months post-surgery                                                  |                                           |                                          |                                                                                    |
| At 12-months post-surgery                                                 |                                           |                                          |                                                                                    |
| <b>Pain in arm or shoulder</b>                                            |                                           |                                          |                                                                                    |
| At 3 months post-surgery                                                  |                                           |                                          |                                                                                    |
| At 6-months post-surgery                                                  |                                           |                                          |                                                                                    |
| At 12-months post-surgery                                                 |                                           |                                          |                                                                                    |
| <b>Pain in other parts</b>                                                |                                           |                                          |                                                                                    |
| At 3 months post-surgery                                                  |                                           |                                          |                                                                                    |
| At 6-months post-surgery                                                  |                                           |                                          |                                                                                    |
| At 12-months post-surgery                                                 |                                           |                                          |                                                                                    |
| <b>Fatigue</b>                                                            |                                           |                                          |                                                                                    |
| <b>Brief fatigue inventory global score</b>                               |                                           |                                          |                                                                                    |
| At 3 months post-surgery                                                  |                                           |                                          |                                                                                    |
| At 6-months post-surgery                                                  |                                           |                                          |                                                                                    |
| <b>Sleep</b>                                                              |                                           |                                          |                                                                                    |
| <b>Sleep disturbance-short form 8b PROMIS<br/>Item Bank sleep T-score</b> |                                           |                                          |                                                                                    |
| At 3 months post-surgery                                                  |                                           |                                          |                                                                                    |
| At 6-months post-surgery                                                  |                                           |                                          |                                                                                    |
| <b>Distress</b>                                                           |                                           |                                          |                                                                                    |
| <b>Distress thermometer</b>                                               |                                           |                                          |                                                                                    |
| At 3 months post-surgery                                                  |                                           |                                          |                                                                                    |
| At 6-months post-surgery                                                  |                                           |                                          |                                                                                    |
| <b>Financial Toxicity</b>                                                 |                                           |                                          |                                                                                    |
| At 3 months post-surgery                                                  |                                           |                                          |                                                                                    |
| At 6-months post-surgery                                                  |                                           |                                          |                                                                                    |

1962  
1963  
1964  
1965

**Table 3.2a - Summary of secondary outcome – IPAQ-SF categorical outcome for activity level**

| Secondary Outcome     | Control group<br>n (%) |          |          | Intervention<br>n (%) |          |          |
|-----------------------|------------------------|----------|----------|-----------------------|----------|----------|
|                       | Baseline               | 3 months | 6 months | Baseline              | 3 months | 6 months |
| IPAQ-SF – categorical |                        |          |          |                       |          |          |
| Low                   |                        |          |          |                       |          |          |
| Moderate              |                        |          |          |                       |          |          |
| High                  |                        |          |          |                       |          |          |
| Missing (count only)  |                        |          |          |                       |          |          |

1966 And/Or

1967 **Table 3.2b - Summary of secondary outcome – IPAQ-SF categorical outcome for activity level**

|                          | Moderate vs Low<br>RRR (95% CI) | High vs Low<br>RRR (95% CI) |
|--------------------------|---------------------------------|-----------------------------|
| At 3 months post-surgery |                                 |                             |
| At 6-months post-surgery |                                 |                             |

1968 Note: Intervention vs Control (reference)

1969

1970 **Table 3.3 - Summary of survival secondary outcome**

| Secondary Outcome                               | Control group<br>N= | Intervention<br>N= | HR (95% CI) |
|-------------------------------------------------|---------------------|--------------------|-------------|
| Survival probability* at 12 months post-surgery |                     |                    |             |

1971 \*Note: Reported with 95% CI.

1972

1973 **Table 3.4 - Summary of secondary outcome return to work/usual activities**

| Secondary Outcome                                          | Control group<br>Mean±SD | Intervention<br>Mean±SD | Estimate (95% CI)<br>(Absolute difference:<br>Intervention minus control) |
|------------------------------------------------------------|--------------------------|-------------------------|---------------------------------------------------------------------------|
| Time to return to work (including non-paid volunteer work) | N=                       | N=                      |                                                                           |
|                                                            |                          |                         |                                                                           |
| Time to return to usual activities                         | N=                       | N=                      |                                                                           |
|                                                            |                          |                         |                                                                           |

1974 Note: The sample size for each outcome will not overlap as patients will be classified as either working prior to surgery or not working prior to surgery. If the distribution of the outcome is skewed then the median and IQR, median difference and corresponding 95% CI will be reported.

1975

1976

1977

1978

1979

**Table 4 - Summary of adverse events (Intervention arm only)**

| Adverse Event                | n (%) | Number of episodes |
|------------------------------|-------|--------------------|
| Fall not resulting in injury |       |                    |
| Severe breathlessness        |       |                    |
| New or progressive pain      |       |                    |
| Neurological deficits        |       |                    |

| Adverse Event         | n (%) | Number of episodes |
|-----------------------|-------|--------------------|
| Altered mental status |       |                    |
| Palpitations          |       |                    |
| Light headedness      |       |                    |
| Progressive fatigue   |       |                    |
| Progressive anorexia  |       |                    |

1980 Note: The number and percentage reflect participants in the intervention arm who experienced at least one  
1981 episode of that adverse event type.

1982

1983 **Table 5.1 Summary of serious adverse events (Intervention arm only)**

| Serious Adverse Event                                          | n (%) | Number of episodes |
|----------------------------------------------------------------|-------|--------------------|
| Death                                                          |       |                    |
| Life threatening                                               |       |                    |
| Required hospitalisation or prolonged existing hospitalisation |       |                    |
| Resulted in disability or incapacity                           |       |                    |

1984 Note: The number and percentage reflect participants in the intervention arm who experienced at  
1985 least one episode of that serious adverse event type.

1986

1987

1988

1989

1990 **Table 5.2 Listing of serious adverse events (Intervention arm only)**

| Subject number | Date of SAE | Serious adverse event type | Description of SAE | Action taken |
|----------------|-------------|----------------------------|--------------------|--------------|
|                |             |                            |                    |              |
|                |             |                            |                    |              |

1991

1992

1993

1994

1995

1996



1997

## APPENDIX C – DATA MAPPING TO DATABASE

1998

Table 8 Data mapping of baseline characteristics

|                              | Characteristic                                                                                                                                                                              | Data type                                          | Variable name in database                                                                                                                                                 | Derived (outside of database)              |
|------------------------------|---------------------------------------------------------------------------------------------------------------------------------------------------------------------------------------------|----------------------------------------------------|---------------------------------------------------------------------------------------------------------------------------------------------------------------------------|--------------------------------------------|
| <b>Baseline demographics</b> |                                                                                                                                                                                             |                                                    |                                                                                                                                                                           |                                            |
|                              | Age at surgery                                                                                                                                                                              | Continuous                                         | age                                                                                                                                                                       | No                                         |
|                              | Sex                                                                                                                                                                                         | Binary                                             | sex                                                                                                                                                                       | No                                         |
|                              | CAPACITY study site                                                                                                                                                                         | Categorical                                        | site                                                                                                                                                                      | No                                         |
|                              | ECOG performance status                                                                                                                                                                     | Categorical                                        | ecog_dr                                                                                                                                                                   | No                                         |
|                              | Cancer histological type                                                                                                                                                                    | Categorical                                        | histological_type                                                                                                                                                         | No                                         |
|                              | Cancer stage                                                                                                                                                                                | Categorical                                        | tnm_stage                                                                                                                                                                 | No                                         |
|                              | Comorbidities<br>- COPD<br>- Tobacco consumption<br>- diabetes<br>- renal insufficiency<br>- respiratory<br>- cardiovascular<br>- neoplastic<br>- alcoholism<br>- Colinet comorbidity Score | Binary<br><br><br><br><br><br><br><br><br>Discrete | copd<br>tobacco_consumption<br>diabetes_mellitus_treated<br>renal_insufficiency<br>respiratory<br>cardiovascular<br>neoplastic<br>alcoholism<br>colinet_comorbidity_score | No                                         |
|                              | Race/ethnicity                                                                                                                                                                              | Categorical                                        | race                                                                                                                                                                      | No                                         |
|                              | Body mass index                                                                                                                                                                             | Continuous                                         | bmi                                                                                                                                                                       | No                                         |
|                              | Smoking history                                                                                                                                                                             | Categorical                                        | smoking_status                                                                                                                                                            | No                                         |
|                              | Education                                                                                                                                                                                   | Categorical                                        | highest_education                                                                                                                                                         | No                                         |
|                              | Occupational status                                                                                                                                                                         | Categorical                                        | employment_2_grouped                                                                                                                                                      | Yes, collapsed categories as per Table 1.2 |
|                              | Living arrangement                                                                                                                                                                          | Categorical                                        | social_situation                                                                                                                                                          | No                                         |
|                              | Respiratory function                                                                                                                                                                        | Continuous                                         |                                                                                                                                                                           | No                                         |

|                                      | Characteristic                                                                                                                                                                                                                                                                                         | Data type                                     | Variable name in database                                                                                                                      | Derived (outside of database) |
|--------------------------------------|--------------------------------------------------------------------------------------------------------------------------------------------------------------------------------------------------------------------------------------------------------------------------------------------------------|-----------------------------------------------|------------------------------------------------------------------------------------------------------------------------------------------------|-------------------------------|
|                                      | <ul style="list-style-type: none"> <li>- FVC in litres actual</li> <li>- FVC in percent predicted</li> <li>- FEV1 in litres actual</li> <li>- FEV1 in percent predicted</li> <li>- FEV1/FVC in percent predicted</li> <li>- DLCO in ml/mmHg/min actual</li> <li>- DLCO in percent predicted</li> </ul> |                                               | fvc_litres<br>fvc_litres_percentpred<br>fev1_litres<br>fev1_litres_percentpred<br>fev1_over_fvc_percentpred<br>dlco_actual<br>dlco_percentpred |                               |
| <b>Surgical and hospital details</b> |                                                                                                                                                                                                                                                                                                        |                                               |                                                                                                                                                |                               |
|                                      | Type of surgery<br>Side of surgery<br>Surgery approach                                                                                                                                                                                                                                                 | Categorical                                   | type_of_surgery<br>type_of_surgery_side<br>type_of_surgery_approach                                                                            | No                            |
|                                      | Hospital length of stay                                                                                                                                                                                                                                                                                | Continuous                                    | los_surgtodc                                                                                                                                   | No                            |
|                                      | Any postoperative complications                                                                                                                                                                                                                                                                        | Binary                                        | hosp_comp                                                                                                                                      | No                            |
|                                      | ICU admission<br>Main reason for ICU admission<br>ICU length of stay<br>ICU intubation                                                                                                                                                                                                                 | Binary<br>Categorical<br>Continuous<br>Binary | hosp_icu<br>hosp_icu_reason<br>hosp_icu_nodays<br>hosp_icu_vent                                                                                | No                            |
|                                      | Mobility status<br><ul style="list-style-type: none"> <li>- Use of gait aid</li> <li>- Level of independence</li> </ul>                                                                                                                                                                                | Binary<br>Categorical                         | dc_mob_aid, dc_mob_aid_yess<br>dc_mob_assistance                                                                                               | No                            |
|                                      | Discharge destination                                                                                                                                                                                                                                                                                  | Categorical                                   | dc_dest                                                                                                                                        | No                            |
| <b>Prior therapy</b>                 |                                                                                                                                                                                                                                                                                                        |                                               |                                                                                                                                                |                               |
|                                      | Type of chemotherapy or radiotherapy                                                                                                                                                                                                                                                                   | Categorical                                   | rx_type                                                                                                                                        | No                            |

1999

2000

2001 **Table 9 Data mapping of primary and secondary outcomes**

|                                                | <b>Outcome</b>                           | <b>Data type</b> | <b>Variable name in database</b> | <b>Derived (outside of database)</b> | <b>Value range</b> |
|------------------------------------------------|------------------------------------------|------------------|----------------------------------|--------------------------------------|--------------------|
| Primary outcome                                |                                          |                  |                                  |                                      |                    |
|                                                | <i>EORTC QLQ C30</i> – physical function | Continuous       | PF2                              | Yes                                  | [0, 100]           |
| Secondary outcomes                             |                                          |                  |                                  |                                      |                    |
| <i>Short Physical Performance Battery SPPB</i> |                                          |                  |                                  |                                      |                    |
|                                                | Total Balance test score (0-4)           | Continuous       | sppb_balance_score               | No                                   | [0, 4]             |
|                                                | Gait speed Test score (0-4)              | Continuous       | sppb_gait_score                  | No                                   | [0, 4]             |
|                                                | Chair Stand Test score (0-4)             | Continuous       | sppb_chair_score                 | No                                   | [0, 4]             |
|                                                | Total SPPB score (0-12)                  | Continuous       | sppb_sum_ordinal_score           | No                                   | [0, 12]            |
| <i>EORTC QLQ C30</i>                           |                                          |                  |                                  |                                      |                    |
|                                                | Global                                   | Continuous       | QL2                              | Yes                                  | [0, 100]           |
|                                                | Physical functioning                     | Continuous       | PF2                              | Yes                                  | [0, 100]           |
|                                                | Role functioning                         | Continuous       | RF2                              | Yes                                  | [0, 100]           |
|                                                | Emotional functioning                    | Continuous       | EF                               | Yes                                  | [0, 100]           |
|                                                | Cognitive functioning                    | Continuous       | CF                               | Yes                                  | [0, 100]           |
|                                                | Social functioning                       | Continuous       | SF                               | Yes                                  | [0, 100]           |
|                                                | Fatigue                                  | Continuous       | FA                               | Yes                                  | [0, 100]           |
|                                                | Nausea and Vomiting                      | Continuous       | NV                               | Yes                                  | [0, 100]           |
|                                                | Pain                                     | Continuous       | PA                               | Yes                                  | [0, 100]           |
|                                                | Dyspnea                                  | Continuous       | DY                               | Yes                                  | [0, 100]           |
|                                                | Insomnia                                 | Continuous       | SL                               | Yes                                  | [0, 100]           |
|                                                | Appetite loss                            | Continuous       | AP                               | Yes                                  | [0, 100]           |
|                                                | Constipation                             | Continuous       | CO                               | Yes                                  | [0, 100]           |
|                                                | Diarrhea                                 | Continuous       | DI                               | Yes                                  | [0, 100]           |
|                                                | Financial difficulties                   | Continuous       | FI                               | Yes                                  | [0, 100]           |
| <i>EORTC QLQ-LC13</i>                          |                                          |                  |                                  |                                      |                    |

|  | <b>Outcome</b>                                                                               | <b>Data type</b> | <b>Variable name in database</b>                                                                                                 | <b>Derived (outside of database)</b>                                                             | <b>Value range</b>                   |
|--|----------------------------------------------------------------------------------------------|------------------|----------------------------------------------------------------------------------------------------------------------------------|--------------------------------------------------------------------------------------------------|--------------------------------------|
|  | Dyspnoea                                                                                     | Continuous       | LCDY                                                                                                                             | Yes                                                                                              | [0, 100]                             |
|  | Coughing                                                                                     | Continuous       | LCCO                                                                                                                             | Yes                                                                                              | [0, 100]                             |
|  | Haemoptysis                                                                                  | Continuous       | LCHA                                                                                                                             | Yes                                                                                              | [0, 100]                             |
|  | Sore mouth                                                                                   | Continuous       | LCSM                                                                                                                             | Yes                                                                                              | [0, 100]                             |
|  | Dysphagia                                                                                    | Continuous       | LCDS                                                                                                                             | Yes                                                                                              | [0, 100]                             |
|  | Peripheral neuropathy                                                                        | Continuous       | LCPN                                                                                                                             | Yes                                                                                              | [0, 100]                             |
|  | Alopecia                                                                                     | Continuous       | LCHR                                                                                                                             | Yes                                                                                              | [0, 100]                             |
|  | Pain in chest                                                                                | Continuous       | LCPC                                                                                                                             | Yes                                                                                              | [0, 100]                             |
|  | Pain in arm or shoulder                                                                      | Continuous       | LCPA                                                                                                                             | Yes                                                                                              | [0, 100]                             |
|  | Pain in other parts                                                                          | Continuous       | LCPO                                                                                                                             | Yes                                                                                              | [0, 100]                             |
|  | <i>6-minute walk distance (6MWD)</i>                                                         |                  |                                                                                                                                  |                                                                                                  |                                      |
|  | 6 MW distance                                                                                | Continuous       | sixmin_distance_max                                                                                                              | Yes, best of 2 attempts, otherwise first attempt:<br>[sixmin_distance_1],<br>[sixmin_distance_2] | [0, 800 meters]                      |
|  | <i>Muscle strength</i>                                                                       |                  |                                                                                                                                  |                                                                                                  |                                      |
|  | Quadriceps strength test (bilateral)<br>- Peak force over 6s<br>- Time to peak force over 6s | Continuous       | strength_knee_left_highest<br>strength_knee_left_longesttime_2<br>strength_knee_right_highest<br>strength_knee_right_longesttime | No                                                                                               | [0, 136 kg]<br>[0, 6s]               |
|  | Hand grip strength test (bilateral)<br>- Highest strength over 6s                            | Continuous       | strength_grip_right_average<br>strength_grip_left_average                                                                        | No                                                                                               | [0, 91 kg (200 lbs)]                 |
|  | <i>IPAQ-SF</i>                                                                               |                  |                                                                                                                                  |                                                                                                  |                                      |
|  | Total MET-minutes/week of PA                                                                 | Continuous       | pa_met                                                                                                                           | Yes                                                                                              | [153, 14688]                         |
|  | Categorical Score of IPAQ                                                                    | Categorical      | ipaq_pa_group                                                                                                                    | Yes                                                                                              | Coded as:<br>0 – Low<br>1 – Moderate |

|  | <b>Outcome</b>                                           | <b>Data type</b> | <b>Variable name in database</b> | <b>Derived (outside of database)</b> | <b>Value range</b>               |
|--|----------------------------------------------------------|------------------|----------------------------------|--------------------------------------|----------------------------------|
|  |                                                          |                  |                                  |                                      | 2 – High                         |
|  | <i>Sedentary time</i>                                    | Continuous       | acsm_2                           | No                                   | [0,24 hours]                     |
|  | <i>Self-efficacy for PA</i>                              |                  |                                  |                                      |                                  |
|  | Walking score                                            | Continuous       | eff_walk_avg                     | Yes                                  | [0, 100]                         |
|  | Barrier score                                            | Continuous       | eff_barrier_avg                  | Yes                                  | [0, 100]                         |
|  | Task score                                               | Continuous       | eff_task_avg                     | Yes                                  | [0, 100]                         |
|  | <i>Brief Fatigue Inventory</i>                           | Continuous       | bfi_global                       | Yes                                  | [0, 10]                          |
|  | <i>Distress Thermometer</i>                              | Continuous       | q_distress_thermometer           | No                                   | [0, 10]                          |
|  | <i>Sleep Disturbance-short form 8b PROMIS</i>            | Continuous       | T_score_sleep                    | Yes                                  | [28.9, 76.5]                     |
|  | <i>COmprehensive Score for financial Toxicity (COST)</i> | Continuous       | finance_total                    | Yes                                  | [0, 44]                          |
|  | Return to usual activities                               | Continuous       | employment_5_weeks               | No                                   | [0, 52 weeks]                    |
|  | Return to work                                           | Continuous       | employment_8_weeks               | No                                   | [0, 52 weeks]                    |
|  | <i>Survival</i>                                          |                  |                                  |                                      |                                  |
|  | Survival status                                          | Binary           | alive_at_12mnth                  | No                                   | Coded as 1 – alive, 0 – deceased |
|  |                                                          |                  | surv_status                      | Yes                                  | Coded as 0 – alive, 1- deceased  |
|  | Follow-up time                                           | Continuous       | death_surgtodeath_days           | No                                   | [0, 365 days]                    |
|  |                                                          |                  | surv_time                        | Yes                                  |                                  |

2002

2003

2004

2005

2006

2007 **Table 10 Data mapping of safety outcomes**

|  | <b>Outcome</b>                                                                                                                                                                                                                                                                                                                                          | <b>Data type</b> | <b>Variable name in database</b>                                             | <b>Derived (outside of database)</b>                                                                      |
|--|---------------------------------------------------------------------------------------------------------------------------------------------------------------------------------------------------------------------------------------------------------------------------------------------------------------------------------------------------------|------------------|------------------------------------------------------------------------------|-----------------------------------------------------------------------------------------------------------|
|  | Safety outcome (Minor adverse event)                                                                                                                                                                                                                                                                                                                    |                  |                                                                              |                                                                                                           |
|  | Adverse event <ul style="list-style-type: none"> <li>- fall not resulting in injury</li> <li>- severe breathlessness</li> <li>- new or progressive pain</li> <li>- neurological deficits</li> <li>- altered mental status</li> <li>- palpitations</li> <li>- light headedness</li> <li>- progressive fatigue</li> <li>- progressive anorexia</li> </ul> | Binary           | ae_minor_type<br>ae1<br>ae2<br>ae3<br>ae4<br>ae5<br>ae6<br>ae7<br>ae8<br>ae9 | Yes, only ae1 to ae9 derived from ae_minor_type, for reporting purposes binary indicators will be created |
|  | Safety outcome (Serious adverse event)                                                                                                                                                                                                                                                                                                                  |                  |                                                                              |                                                                                                           |
|  | Date of Adverse Event                                                                                                                                                                                                                                                                                                                                   | Date             | ae_dtm                                                                       | No                                                                                                        |
|  | Serious adverse event type <ul style="list-style-type: none"> <li>- resulted in death</li> <li>- life threatening</li> <li>- required hospitalisation or prolonged existing hospitalisation</li> <li>- resulted in disability or incapacity</li> </ul>                                                                                                  | Categorical      | ae_serious_type                                                              | No                                                                                                        |
|  | Description of SAE                                                                                                                                                                                                                                                                                                                                      | String           | ae_description                                                               | No                                                                                                        |
|  | Action taken                                                                                                                                                                                                                                                                                                                                            | String           | ae_action                                                                    | No                                                                                                        |

2008

2009

2010
