# Supplementary material for: Home-Based Exercise and Self-Management After Lung Cancer Resection: A Randomized Clinical Trial
Source: PubMed Central journal article supplement (PMC11612835; doi:10.1001/jamanetworkopen.2024.47325), 2024-12-02
Supplement: jamanetwopen-e2447325-s003.pdf [file jamanetwopen-e2447325-s003.pdf]

## Data Sharing Statement

Granger. Home-Based Exercise and Self-Management After Lung Cancer Resection. *JAMA Netw Open*. Published December 02, 2024. doi:10.1001/jamanetworkopen.2024.47325

### Data

**Additional Information:** Australian and New Zealand Clinical Trials Registry ANZCTR <https://anzctr.org.au/> Identifier: ACTRN12617001283369.

**Data available:** Yes

**Data types:** Deidentified participant data, Data dictionary

**How to access data:** Available from corresponding author via email request to [catherine.granger@unimelb.edu.au](mailto:catherine.granger@unimelb.edu.au)

**When available:** With publication

### Supporting Documents

**Document types:** Statistical/analytic code, Informed consent form, Other (please specify)

**Additional Information:** Also available - patient educational material and data collection forms

**How to access documents:** Available from corresponding author via email request to [catherine.granger@unimelb.edu.au](mailto:catherine.granger@unimelb.edu.au)

**When available:** With publication

### Additional Information

**Who can access the data:** Researchers whose proposed use of the data has been approved.

**Types of analyses:** For specified research purpose.

**Mechanisms of data availability:** With investigator support, after approval of a proposal and appropriate ethical approval, with a signed data access agreement.

**Any additional restrictions:** Nil
